# Supplementary material for: Revealing Hidden Conformational Space of LOV Protein VIVID Through Rigid Residue Scan Simulations
Source: PubMed Central journal article supplement (PMC5397860; doi:10.1038/srep46626), 2017-04-20

# Revealing Hidden Conformational Space of LOV Protein

## VIVID Through Rigid Residue Scan Simulations

### **Supplementary Data**

*Hongyu Zhou, Brian D. Zoltowski, and Peng Tao\**

Department of Chemistry, Center for Drug Discovery, Design, and Delivery (CD4), Center for Scientific Computation, Southern Methodist University, Dallas, Texas 75275, United States of America

\* Corresponding authors

Peng Tao: Telephone: 1-214-768-8802, Fax: 1-214-768-4089, Email: [ptao@smu.edu](mailto:ptao@smu.edu)

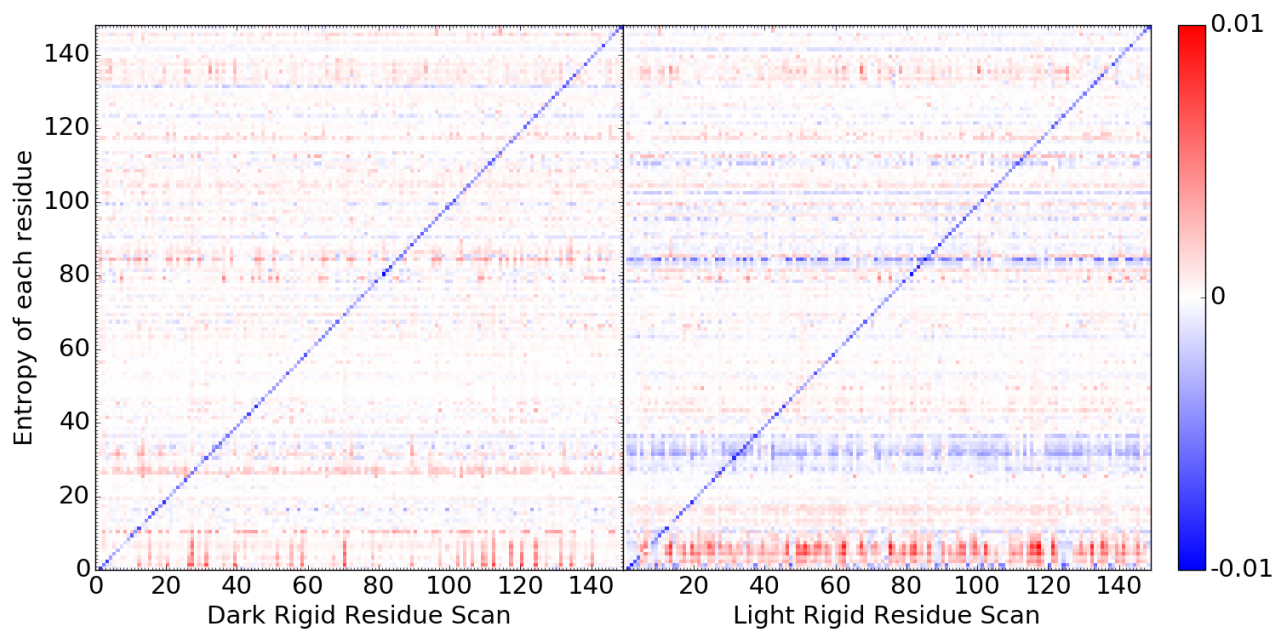

Fig. S1. Heat map of individual residue entropy contribution normalized based on the number of atoms in each residue under rigid residue perturbation for dark (left) and light (right) states. The horizontal axis corresponds to the RRS simulations and indices of residues being held as rigid body. The vertical axis corresponds to the residue index for entropy contributions. The entropy contribution from each residue in unperturbed simulation is set as reference.

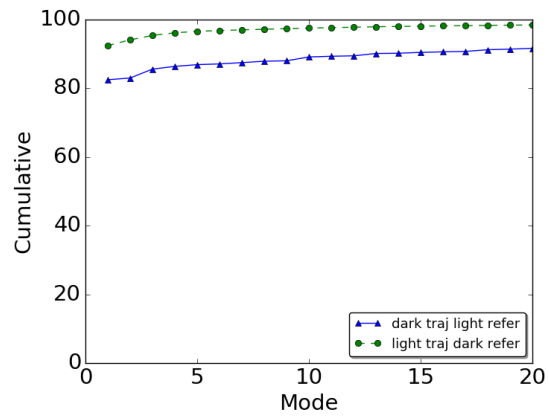

Fig. S2: Distribution from unperturbed Dark and Light state simulations to two 20 principal components (PCs) generated from the unperturbed Dark state simulation with optimized Light structure as reference.

Table S1: RMSD plots of VVD from rigid residue scan for both Dark and Light states. Each residue number represents a simulation in which that particular residue is subjected to rigid body constraints.

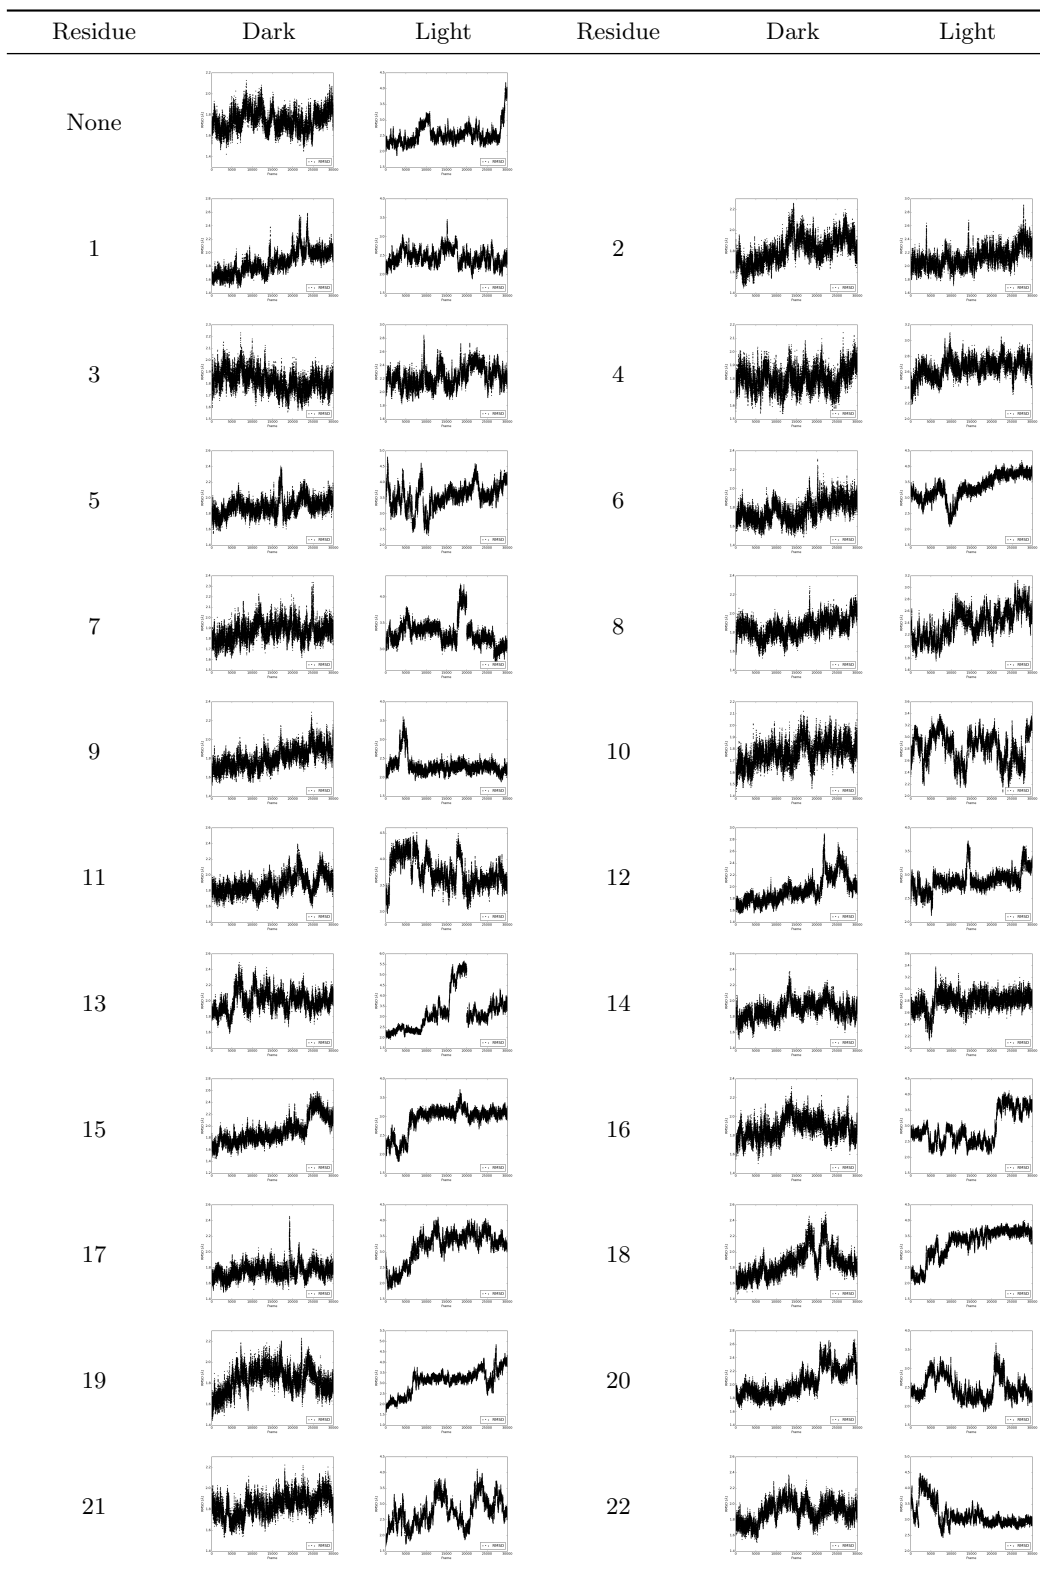

Table S1: RMSD plots of VVD from rigid residue scan for both Dark and Light states. Each residue number represents a simulation in which that particular residue is subjected to rigid body constraints.

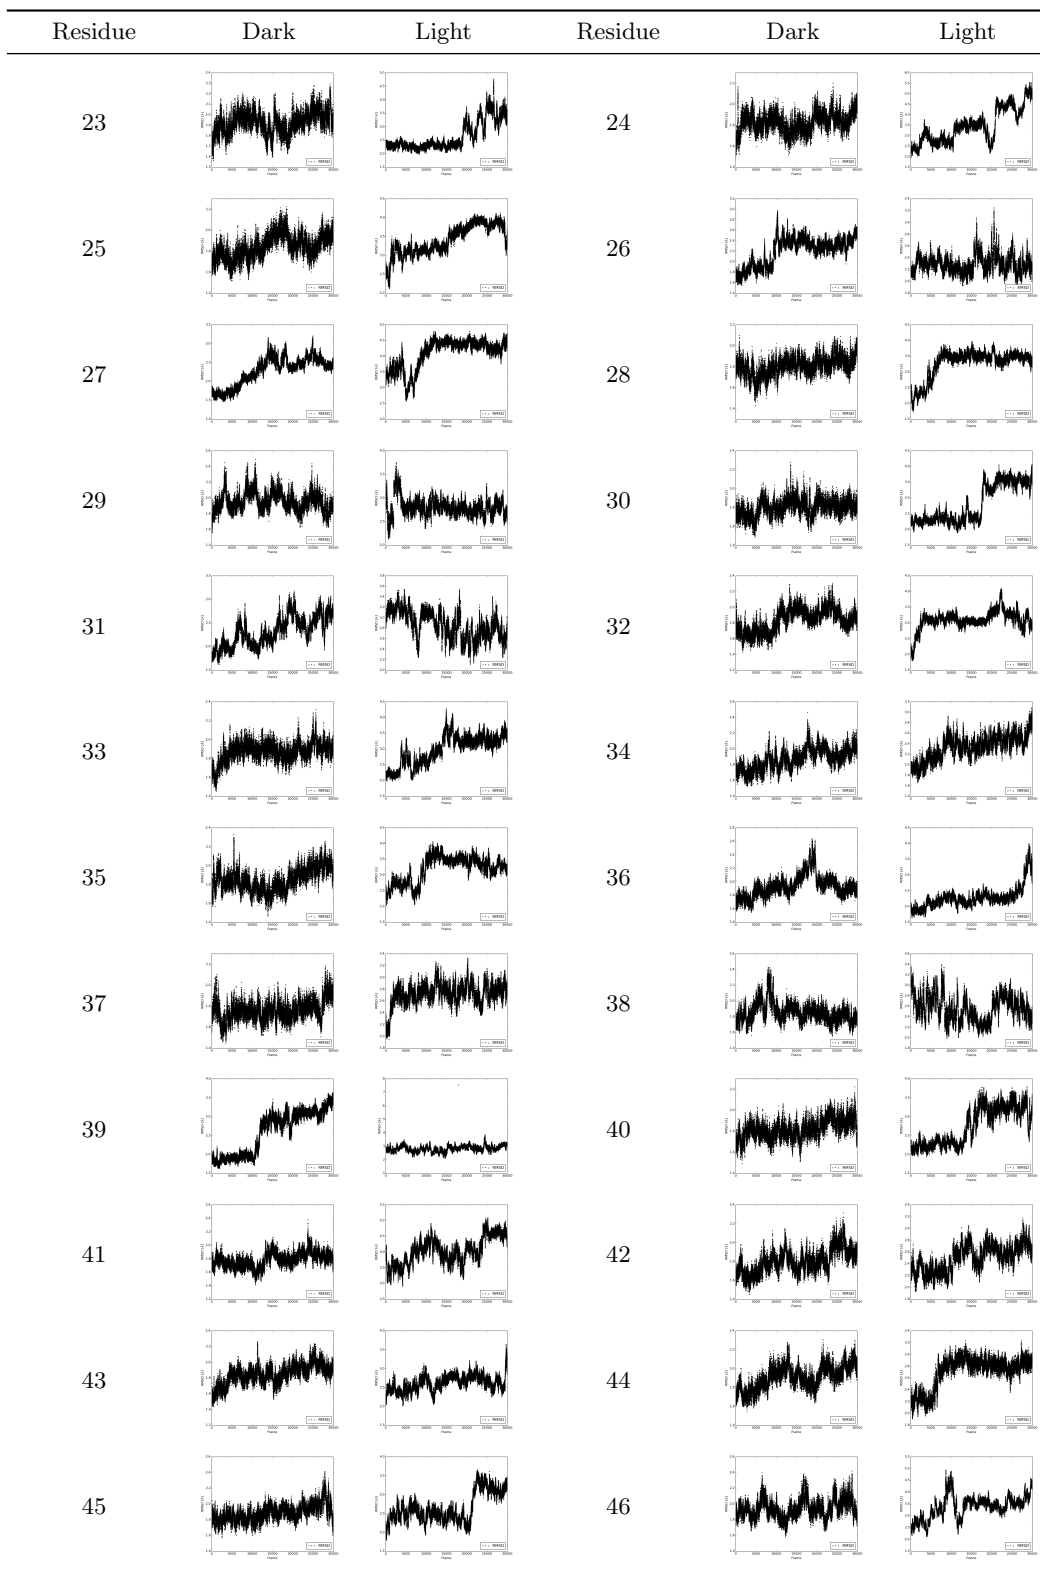

Table S1: RMSD plots of VVD from rigid residue scan for both Dark and Light states. Each residue number represents a simulation in which that particular residue is subjected to rigid body constraints.

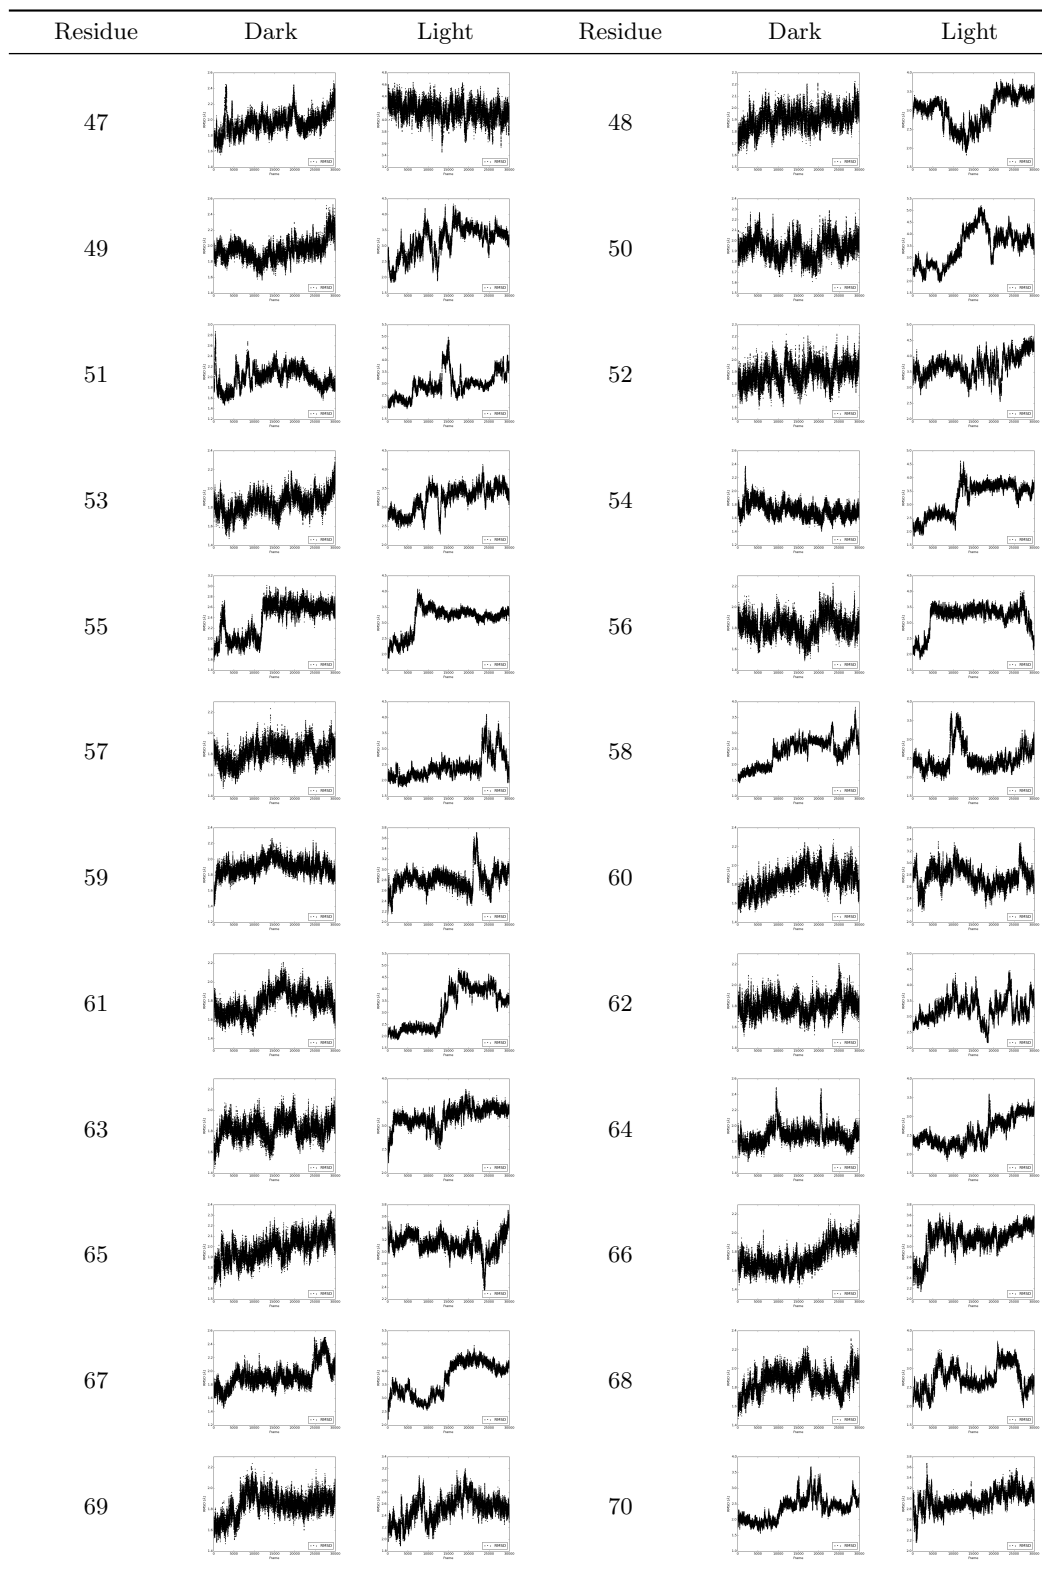

Table S1: RMSD plots of VVD from rigid residue scan for both Dark and Light states. Each residue number represents a simulation in which that particular residue is subjected to rigid body constraints.

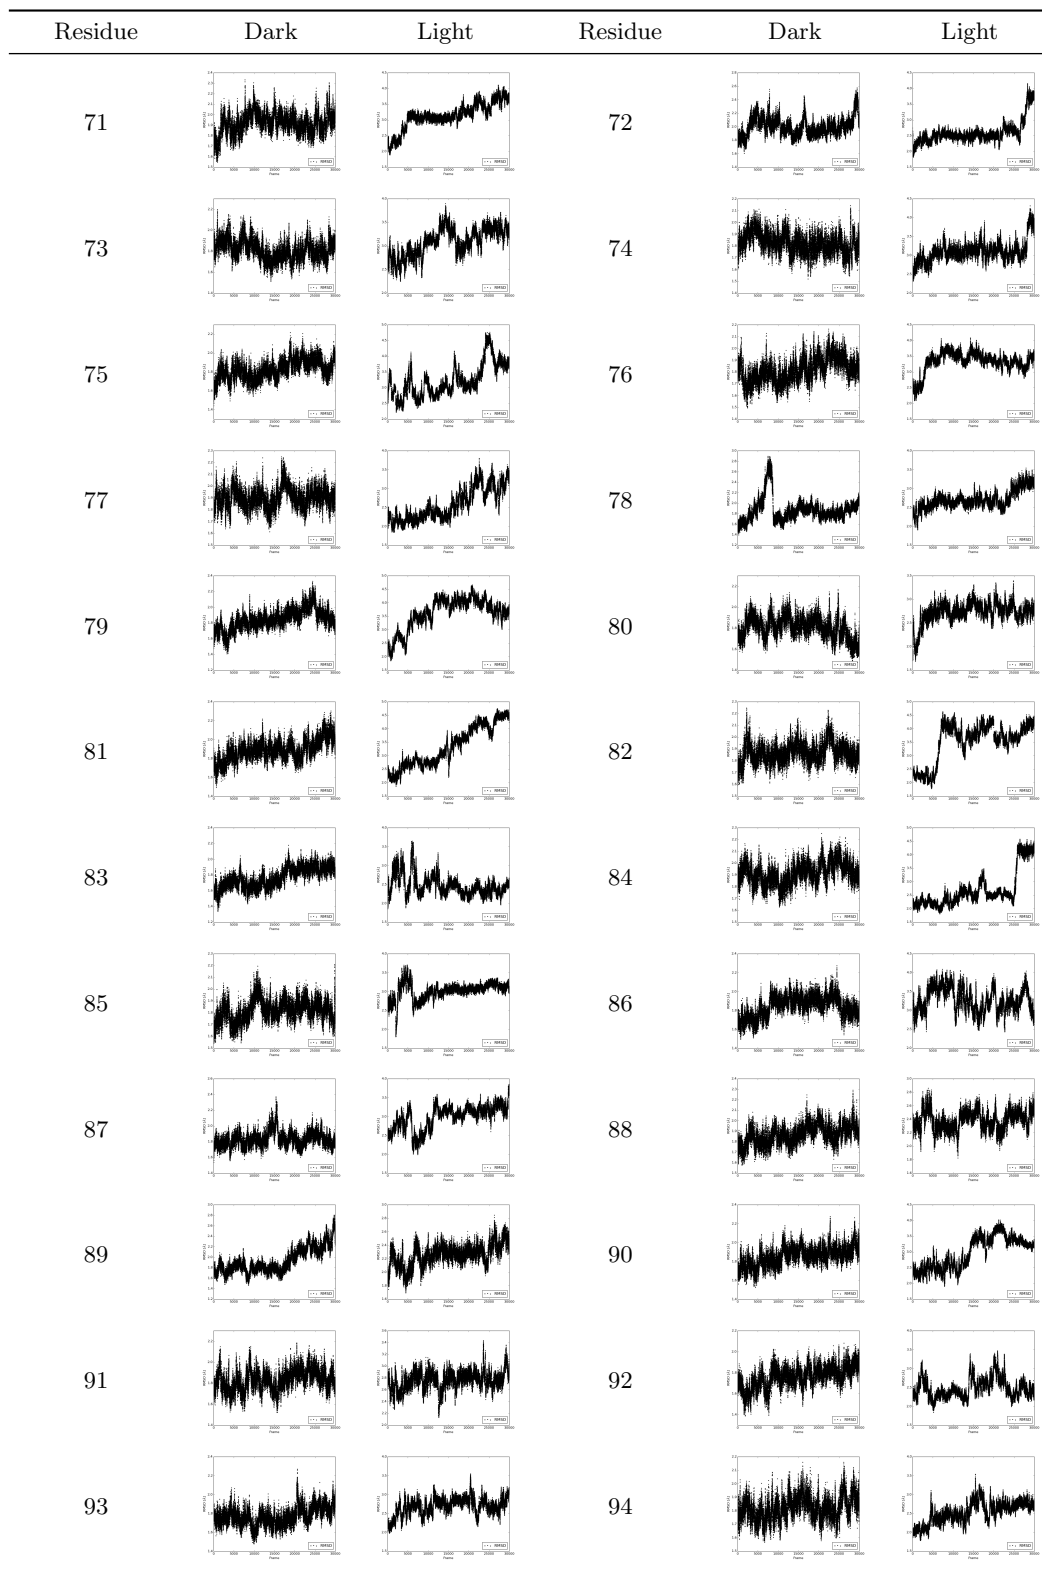

Table S1: RMSD plots of VVD from rigid residue scan for both Dark and Light states. Each residue number represents a simulation in which that particular residue is subjected to rigid body constraints.

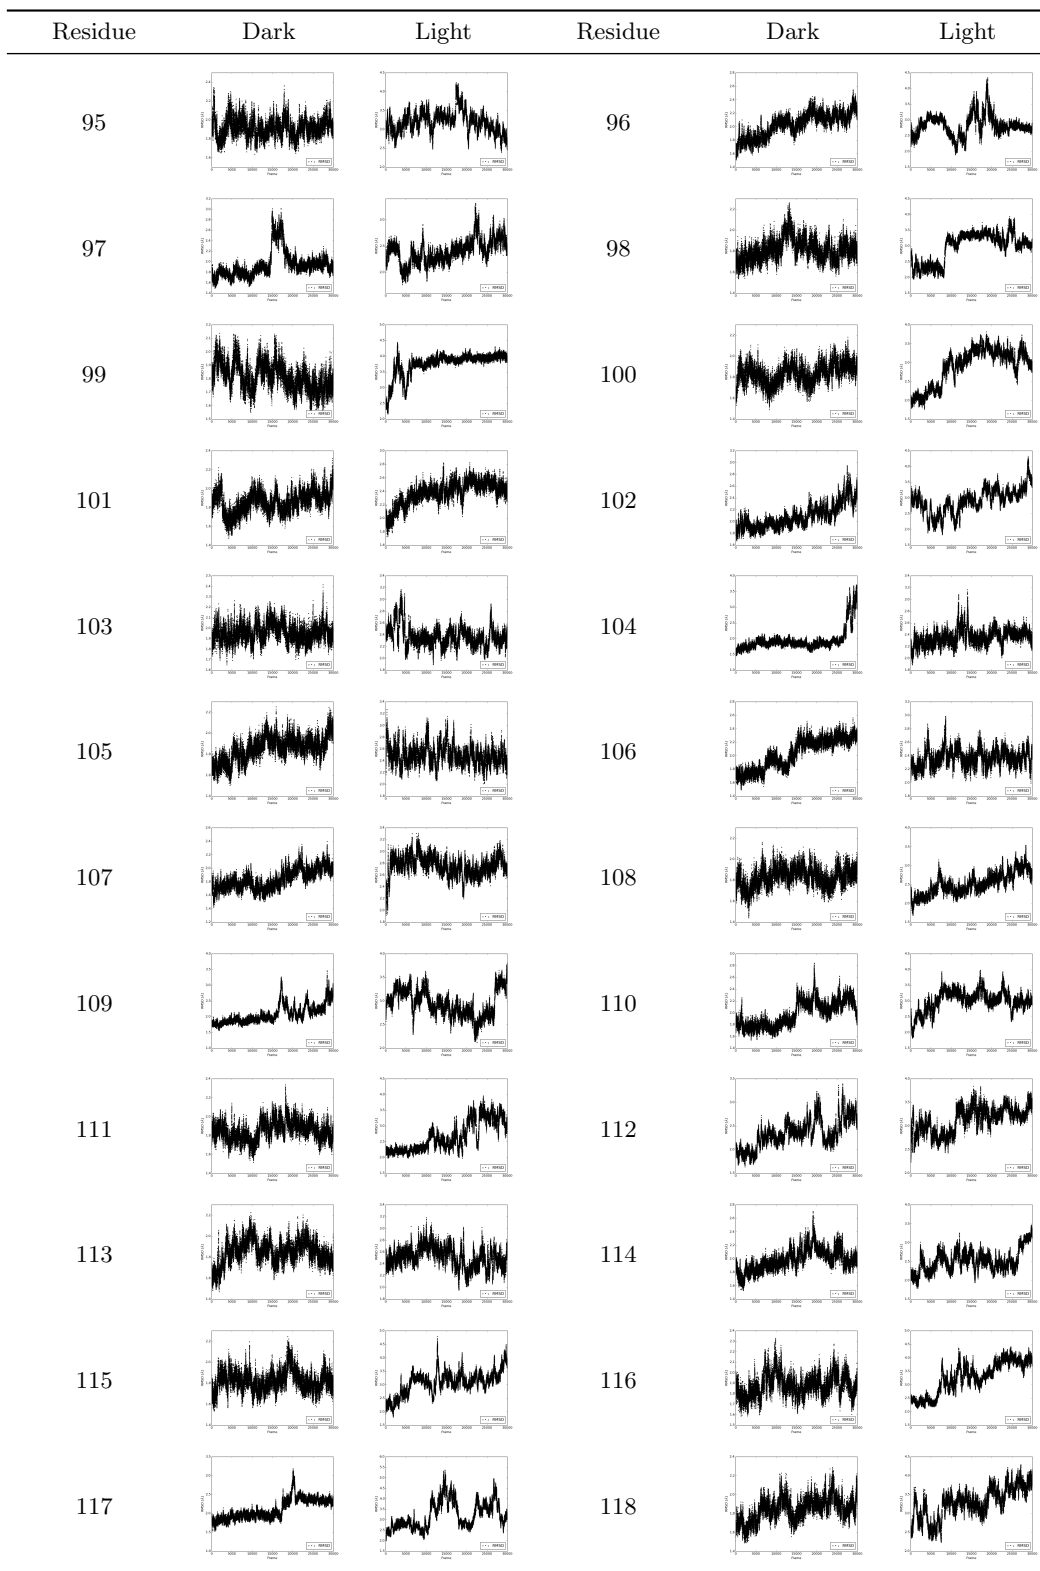



Table S1: RMSD plots of VVD from rigid residue scan for both Dark and Light states. Each residue number represents a simulation in which that particular residue is subjected to rigid body constraints.

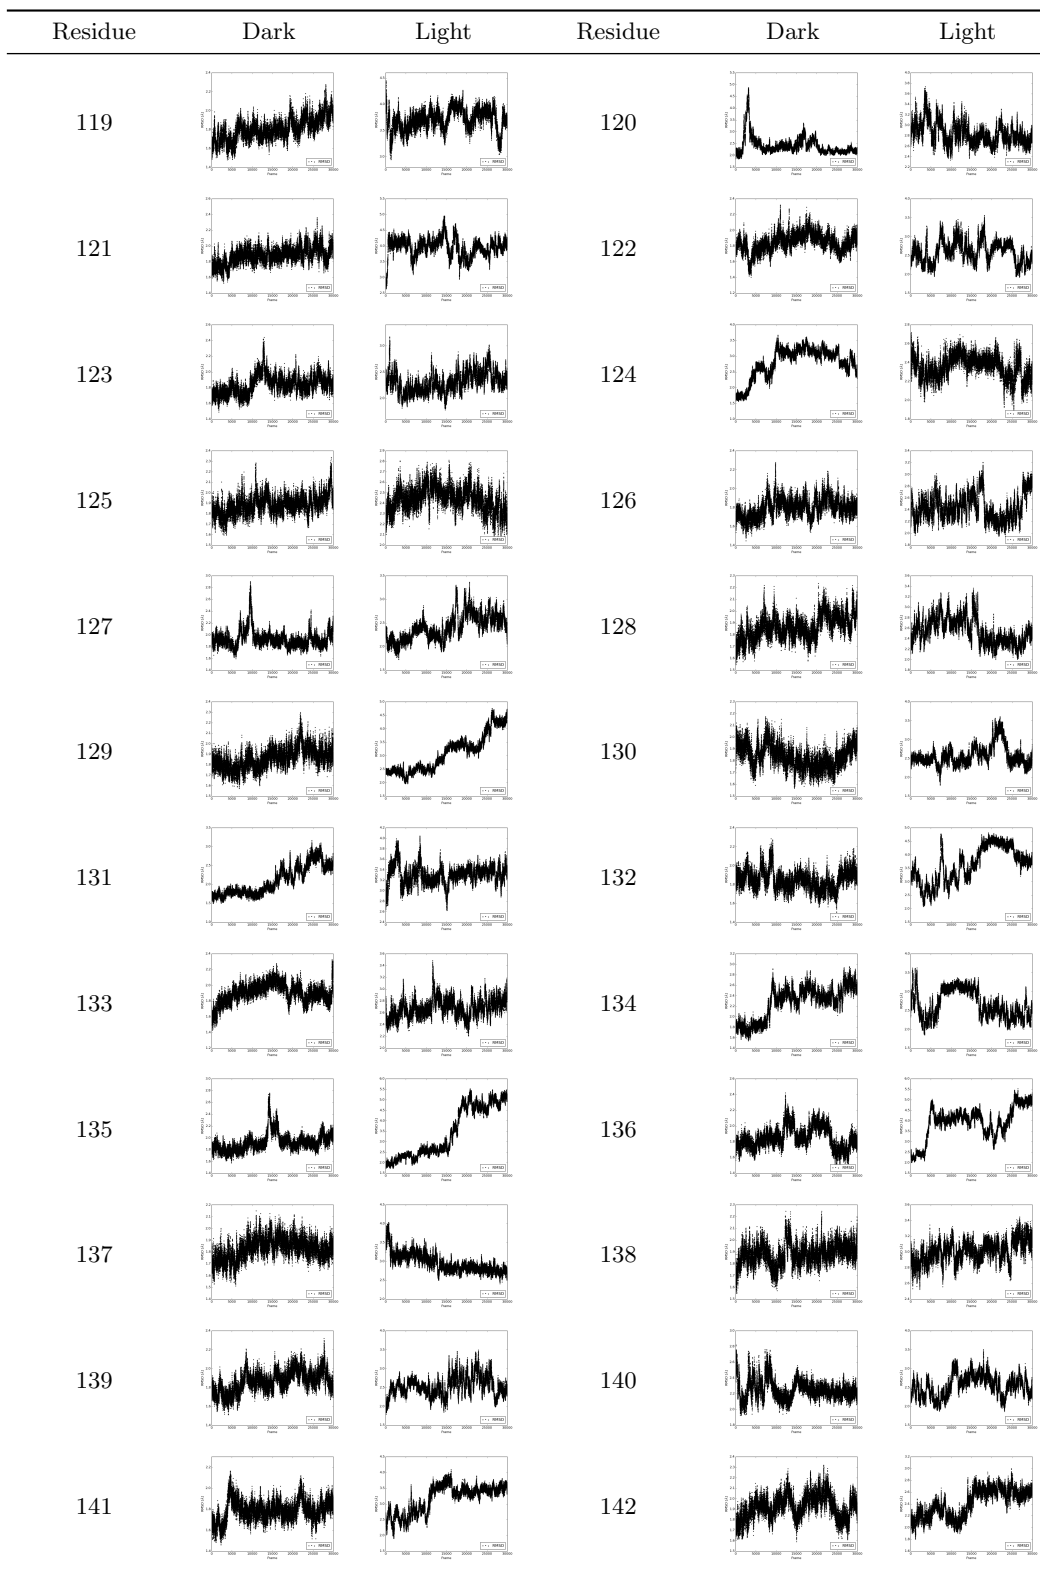

Table S1: RMSD plots of VVD from rigid residue scan for both Dark and Light states. Each residue number represents a simulation in which that particular residue is subjected to rigid body constraints.

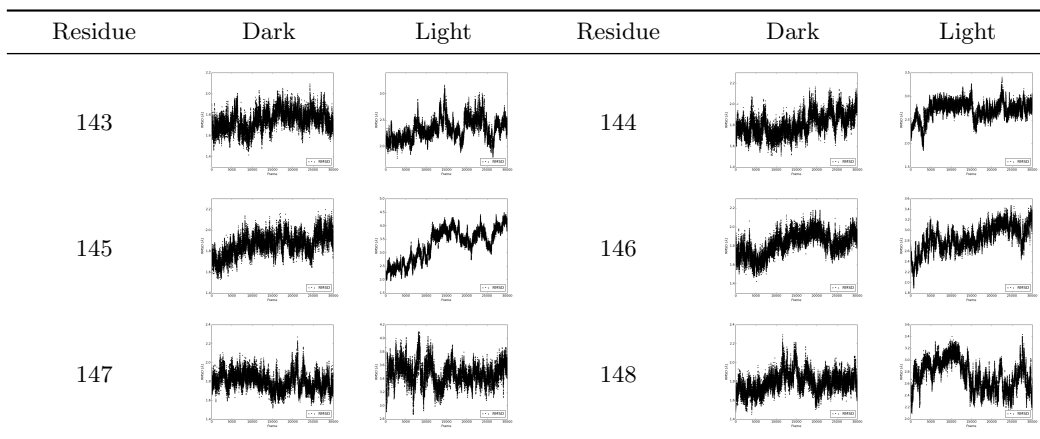

Table S2: Two dimensional (2D) RMSD contour plots of rigid residue scan (RRS) VVD Dark and Light MD simulations using RMSD values with references to both optimized Dark and Light states. Each residue number represents a simulation in which that particular residue is subjected to rigid body constraints. In each plot, Dark state attraction basin is illustrated mainly in green, and Light state attraction basin is illustrated mainly in brown.

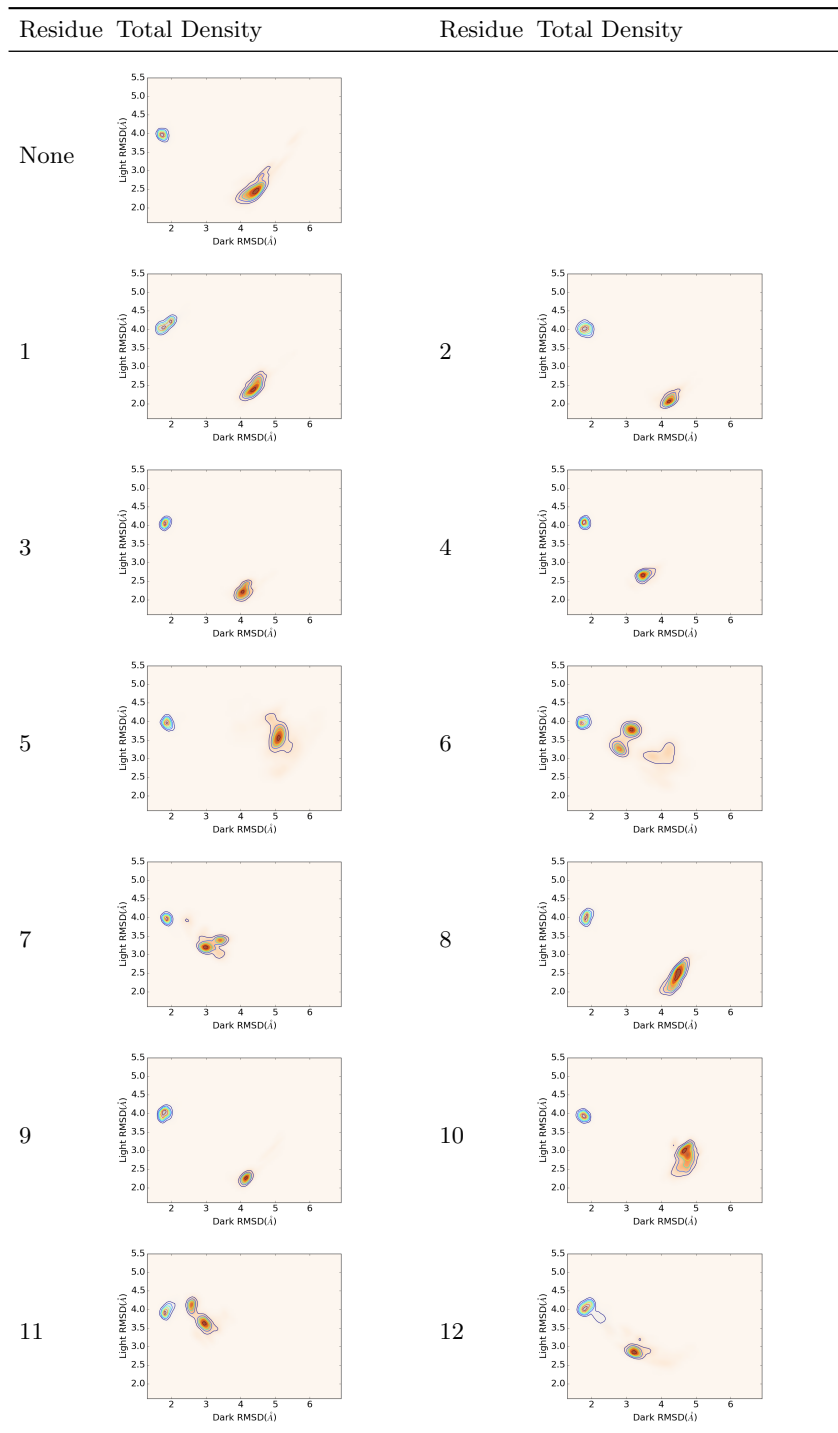

Table S2: Two dimensional (2D) RMSD contour plots of rigid residue scan (RRS) VVD Dark and Light MD simulations using RMSD values with references to both optimized Dark and Light states. Each residue number represents a simulation in which that particular residue is subjected to rigid body constraints. In each plot, Dark state attraction basin is illustrated mainly in green, and Light state attraction basin is illustrated mainly in brown.

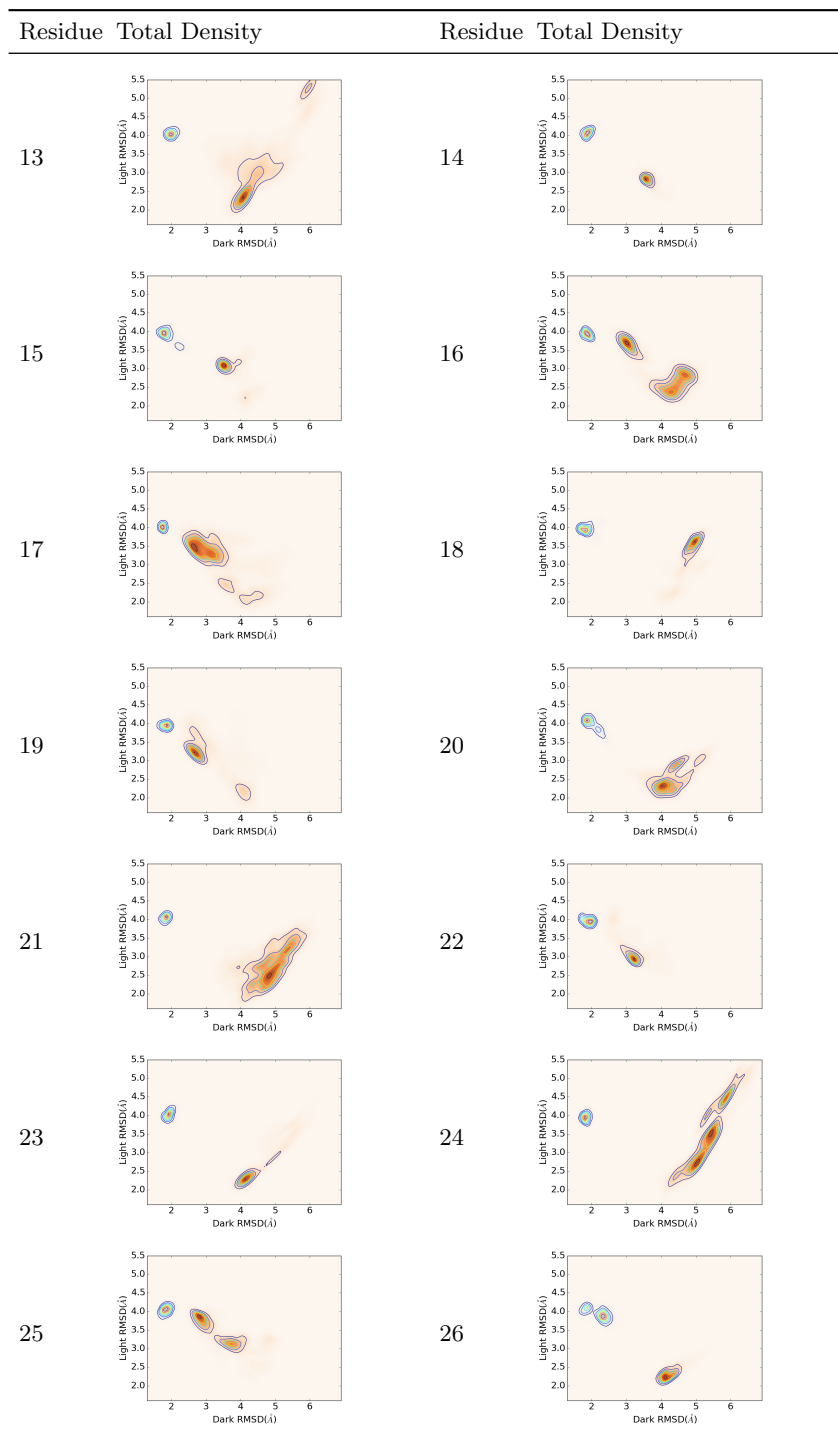

Table S2: Two dimensional (2D) RMSD contour plots of rigid residue scan (RRS) VVD Dark and Light MD simulations using RMSD values with references to both optimized Dark and Light states. Each residue number represents a simulation in which that particular residue is subjected to rigid body constraints. In each plot, Dark state attraction basin is illustrated mainly in green, and Light state attraction basin is illustrated mainly in brown.

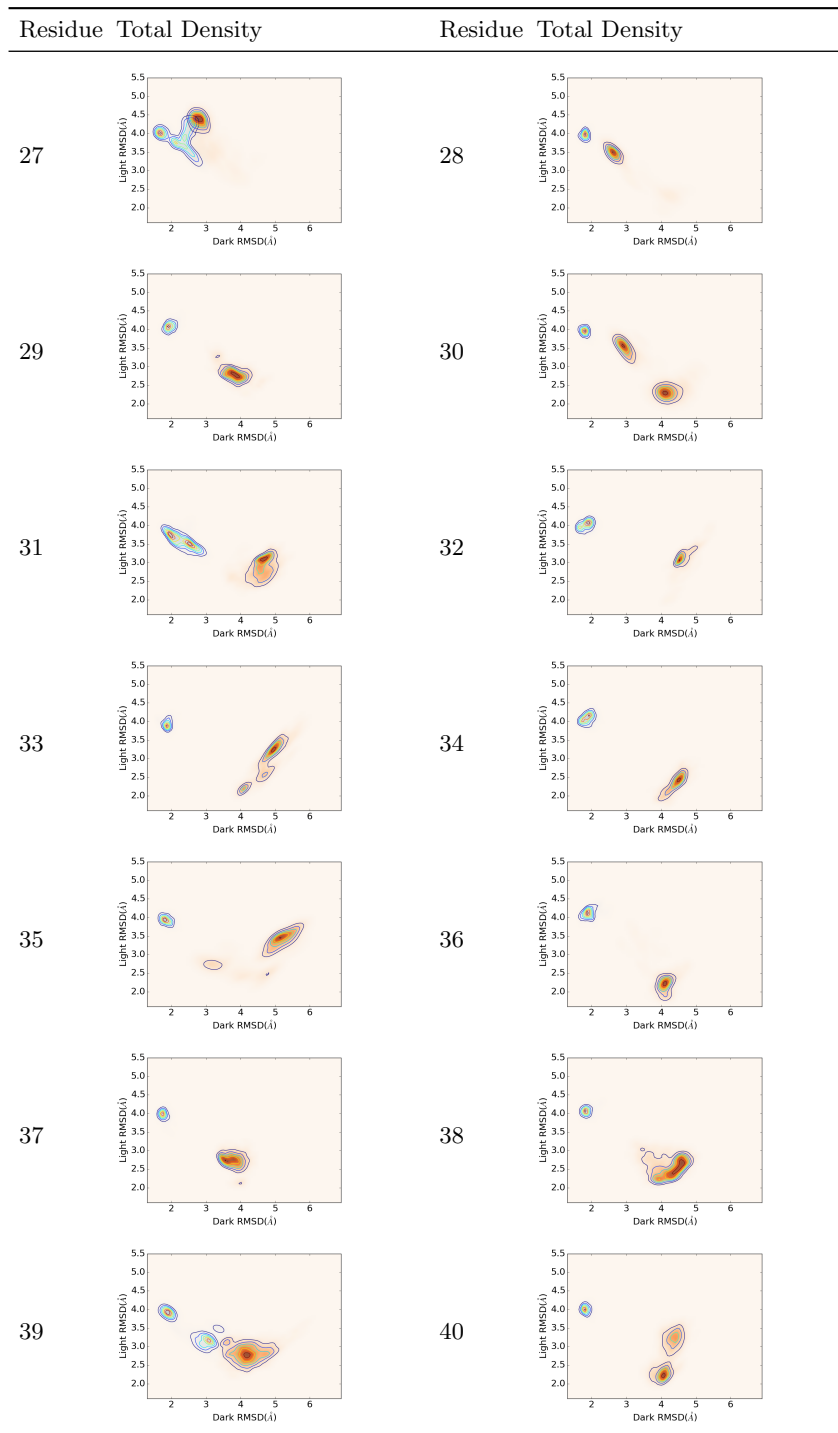

Table S2: Two dimensional (2D) RMSD contour plots of rigid residue scan (RRS) VVD Dark and Light MD simulations using RMSD values with references to both optimized Dark and Light states. Each residue number represents a simulation in which that particular residue is subjected to rigid body constraints. In each plot, Dark state attraction basin is illustrated mainly in green, and Light state attraction basin is illustrated mainly in brown.

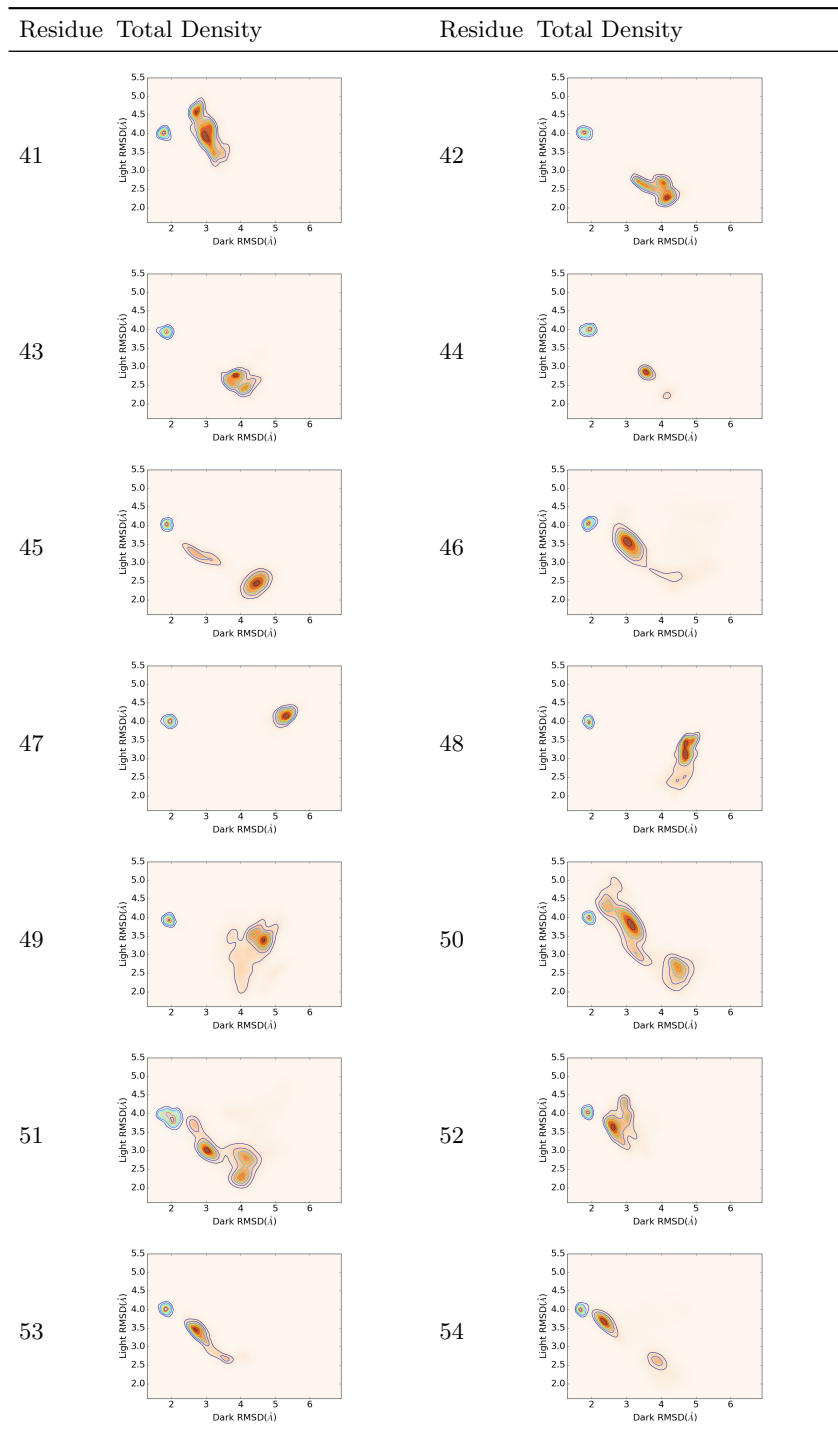

Table S2: Two dimensional (2D) RMSD contour plots of rigid residue scan (RRS) VVD Dark and Light MD simulations using RMSD values with references to both optimized Dark and Light states. Each residue number represents a simulation in which that particular residue is subjected to rigid body constraints. In each plot, Dark state attraction basin is illustrated mainly in green, and Light state attraction basin is illustrated mainly in brown.

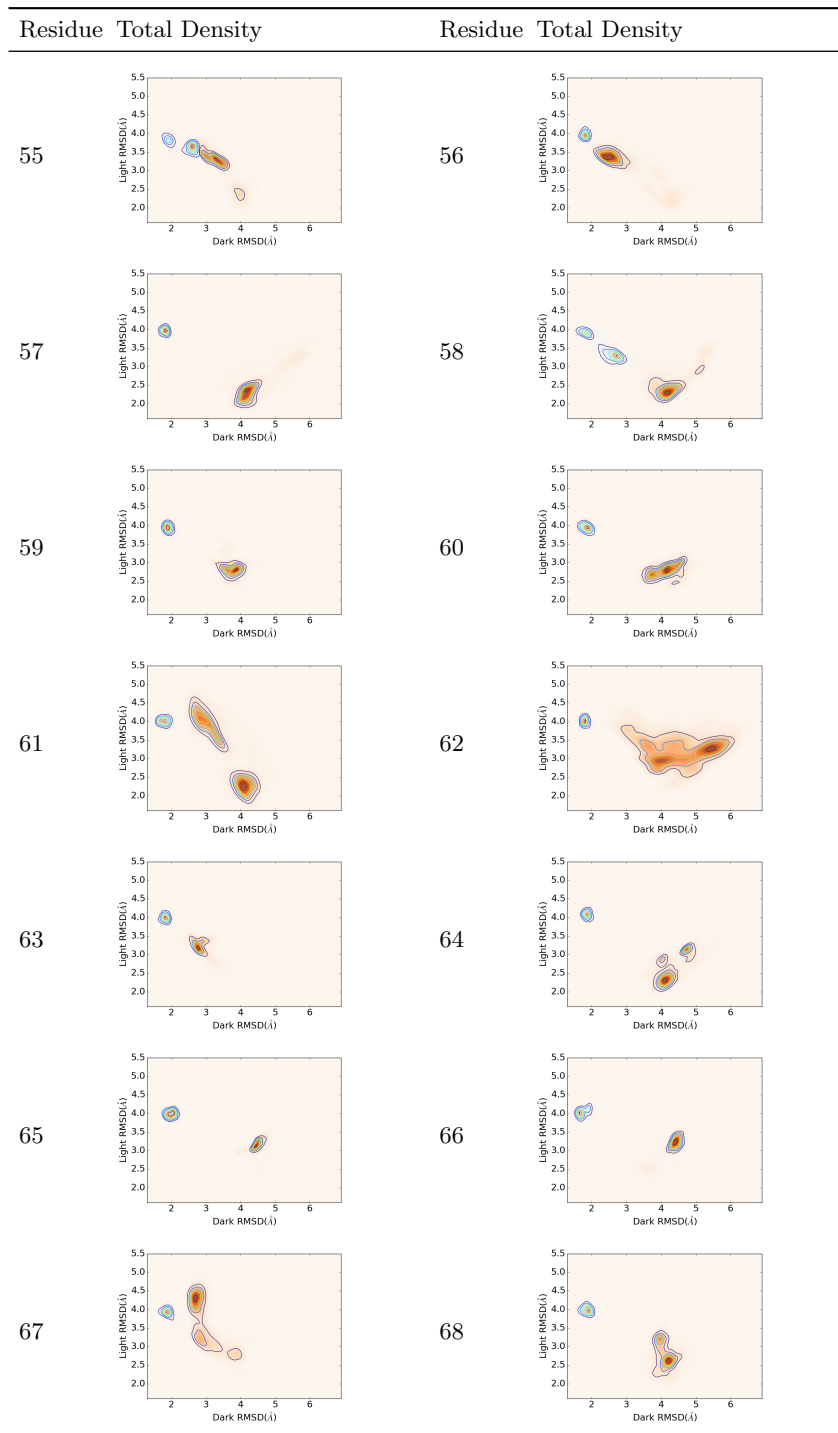

Table S2: Two dimensional (2D) RMSD contour plots of rigid residue scan (RRS) VVD Dark and Light MD simulations using RMSD values with references to both optimized Dark and Light states. Each residue number represents a simulation in which that particular residue is subjected to rigid body constraints. In each plot, Dark state attraction basin is illustrated mainly in green, and Light state attraction basin is illustrated mainly in brown.

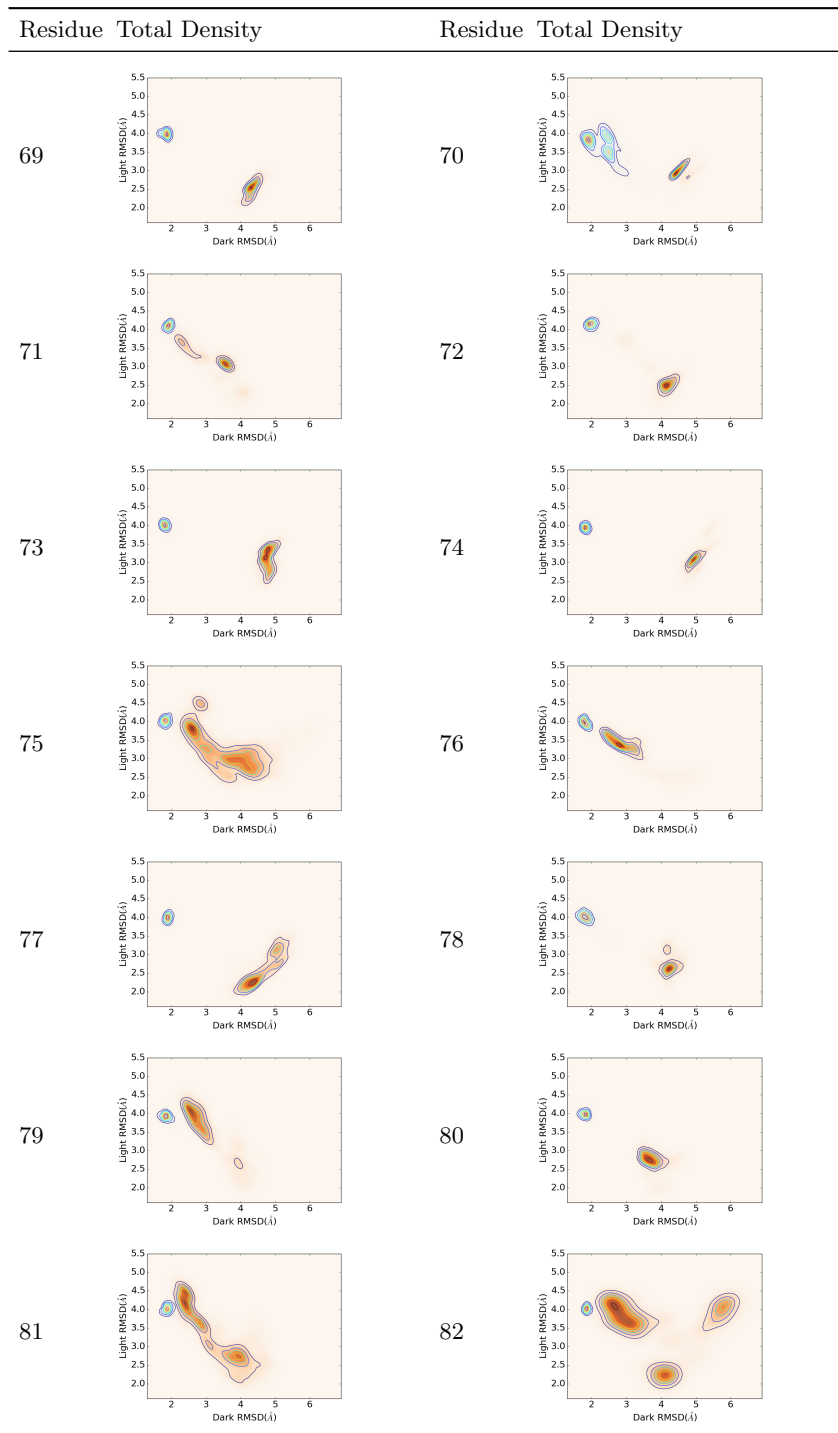



Table S2: Two dimensional (2D) RMSD contour plots of rigid residue scan (RRS) VVD Dark and Light MD simulations using RMSD values with references to both optimized Dark and Light states. Each residue number represents a simulation in which that particular residue is subjected to rigid body constraints. In each plot, Dark state attraction basin is illustrated mainly in green, and Light state attraction basin is illustrated mainly in brown.

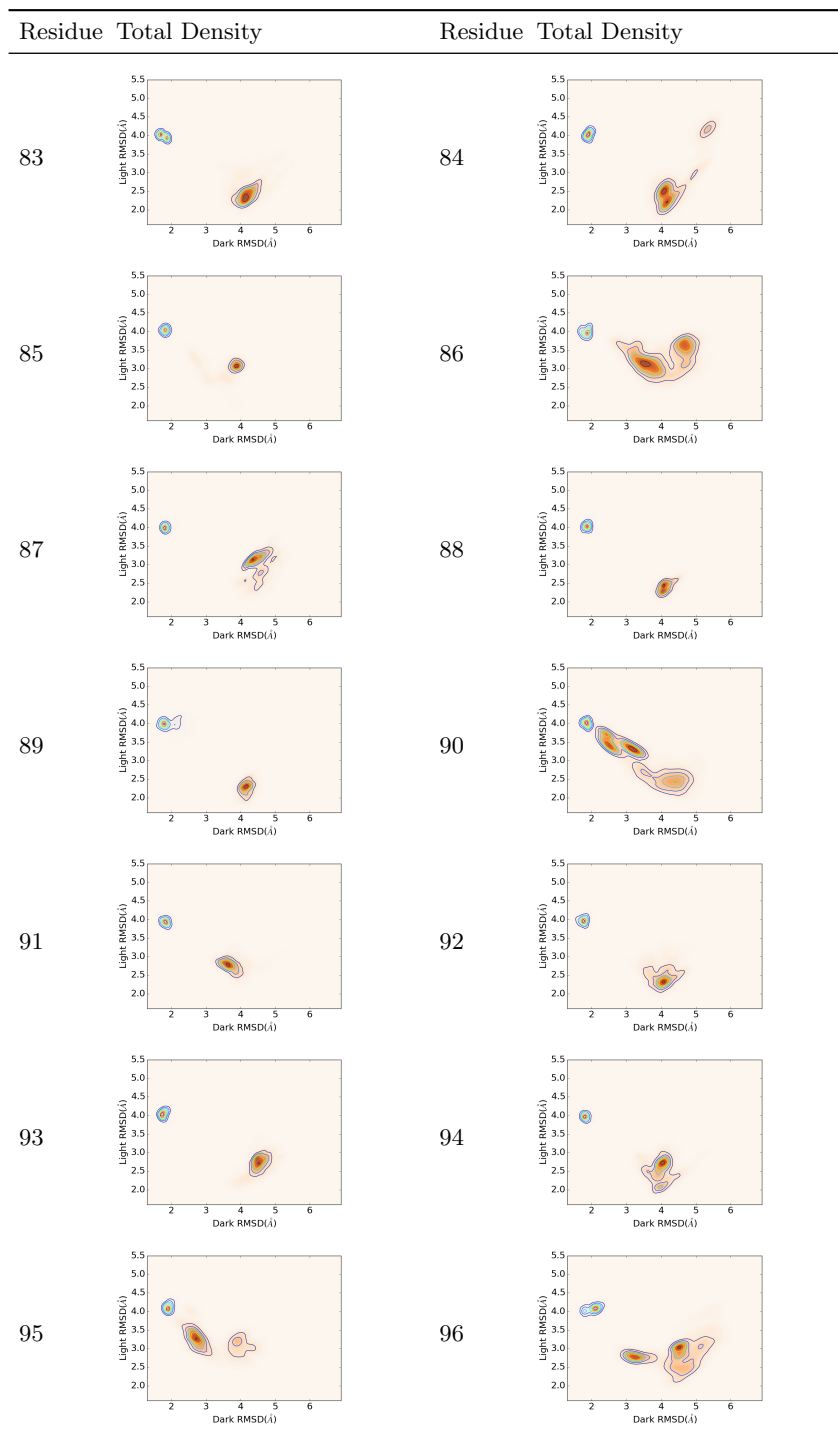

Table S2: Two dimensional (2D) RMSD contour plots of rigid residue scan (RRS) VVD Dark and Light MD simulations using RMSD values with references to both optimized Dark and Light states. Each residue number represents a simulation in which that particular residue is subjected to rigid body constraints. In each plot, Dark state attraction basin is illustrated mainly in green, and Light state attraction basin is illustrated mainly in brown.

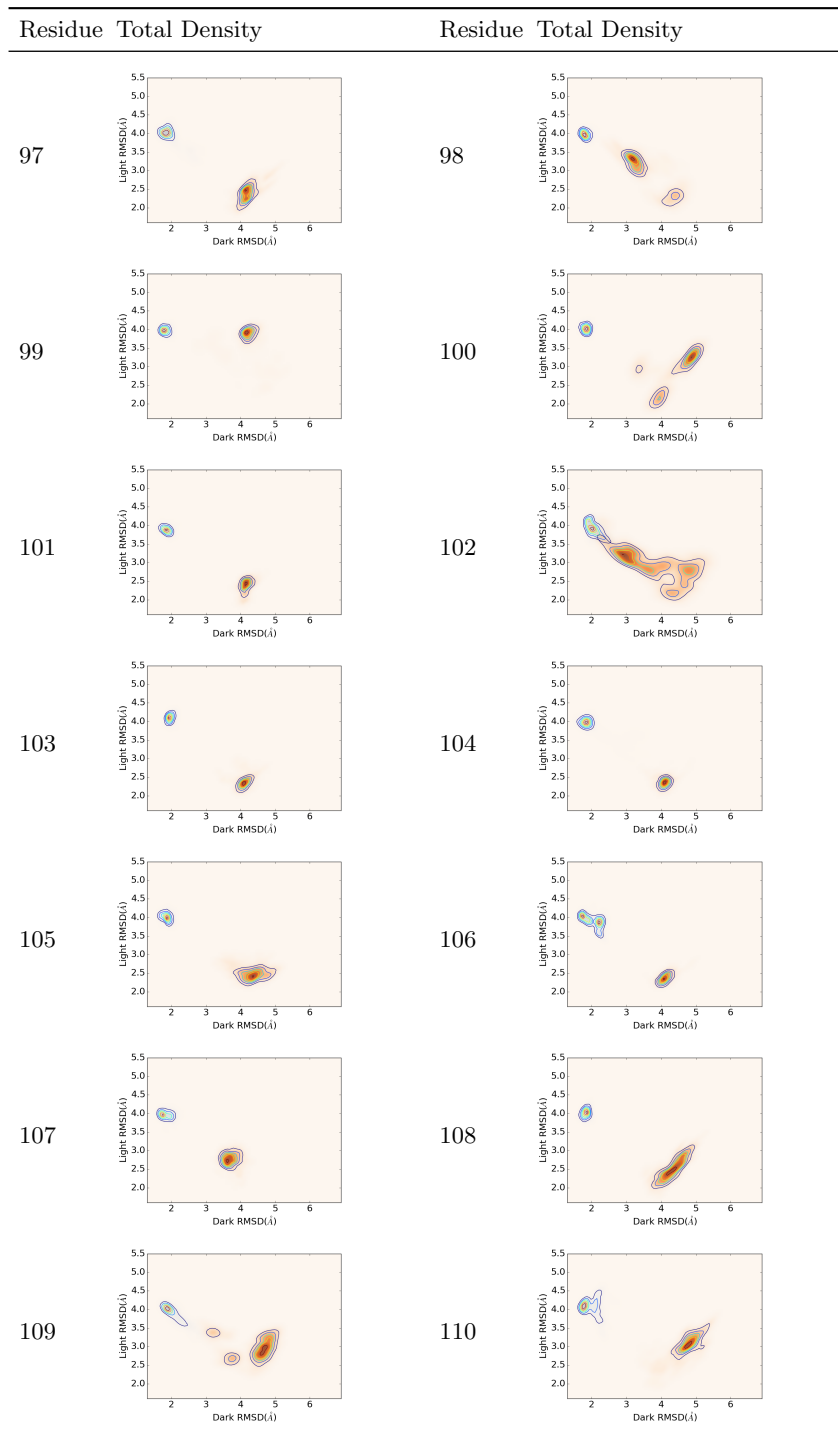

Table S2: Two dimensional (2D) RMSD contour plots of rigid residue scan (RRS) VVD Dark and Light MD simulations using RMSD values with references to both optimized Dark and Light states. Each residue number represents a simulation in which that particular residue is subjected to rigid body constraints. In each plot, Dark state attraction basin is illustrated mainly in green, and Light state attraction basin is illustrated mainly in brown.

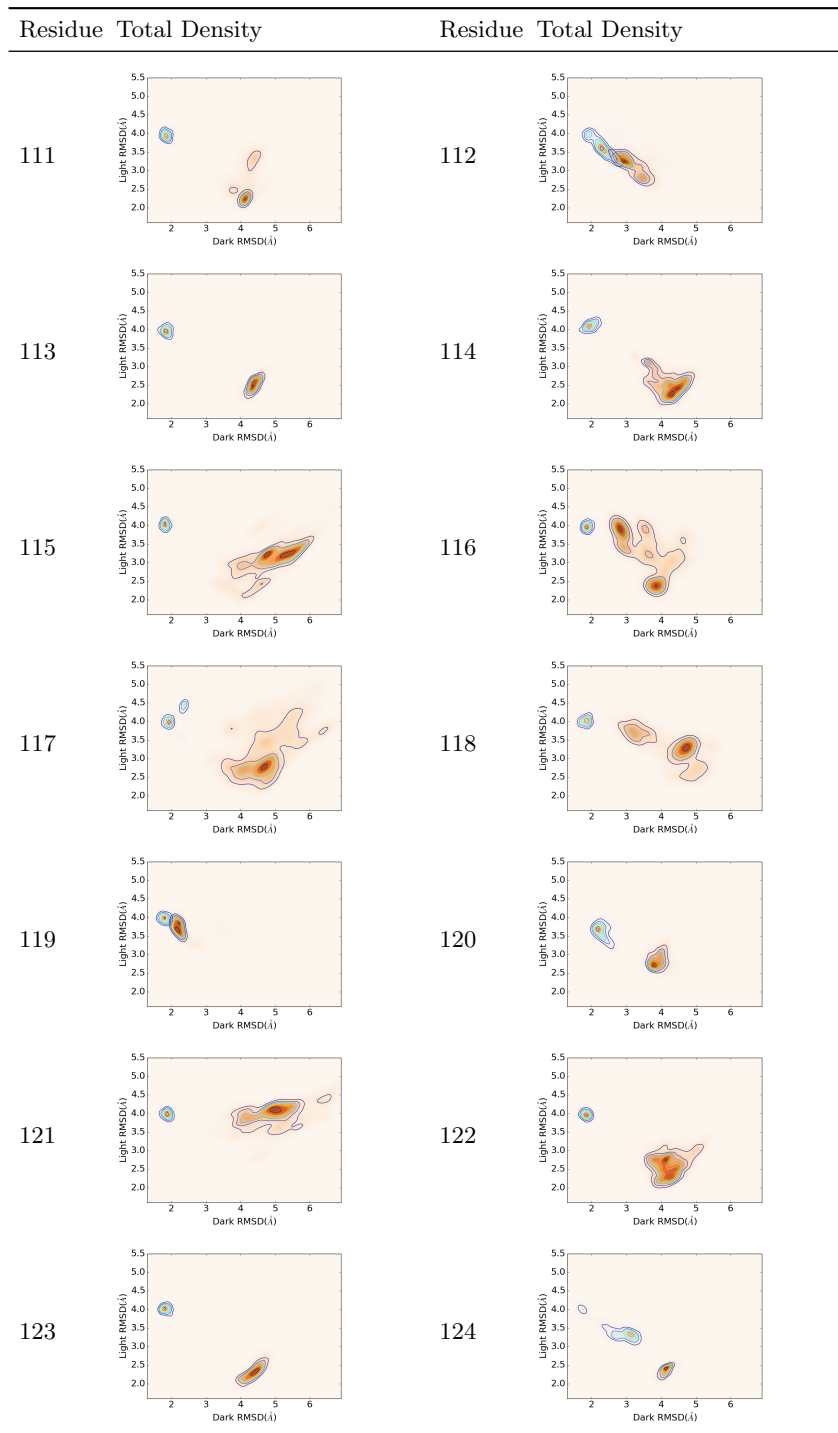

Table S2: Two dimensional (2D) RMSD contour plots of rigid residue scan (RRS) VVD Dark and Light MD simulations using RMSD values with references to both optimized Dark and Light states. Each residue number represents a simulation in which that particular residue is subjected to rigid body constraints. In each plot, Dark state attraction basin is illustrated mainly in green, and Light state attraction basin is illustrated mainly in brown.

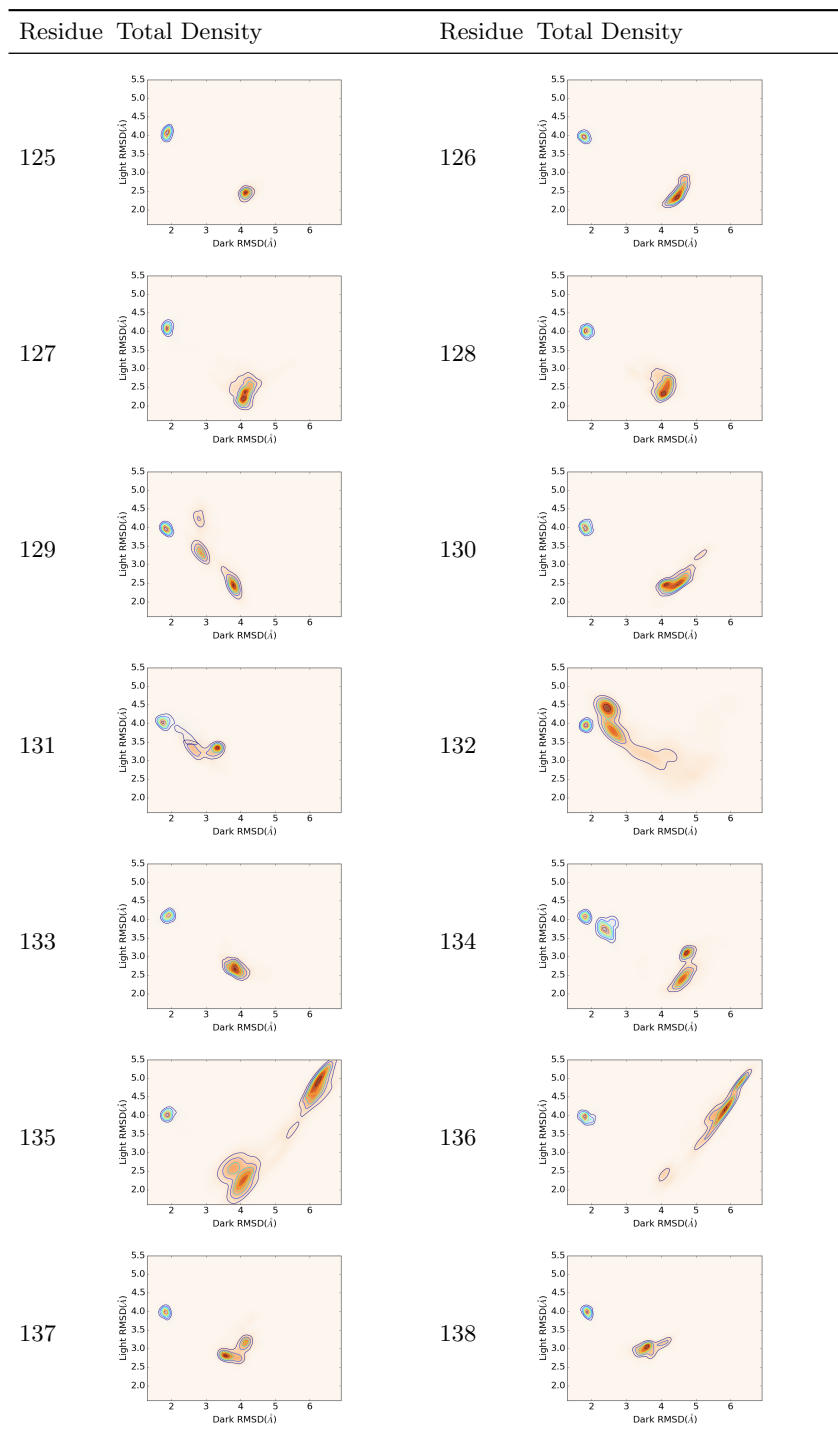

Table S2: Two dimensional (2D) RMSD contour plots of rigid residue scan (RRS) VVD Dark and Light MD simulations using RMSD values with references to both optimized Dark and Light states. Each residue number represents a simulation in which that particular residue is subjected to rigid body constraints. In each plot, Dark state attraction basin is illustrated mainly in green, and Light state attraction basin is illustrated mainly in brown.

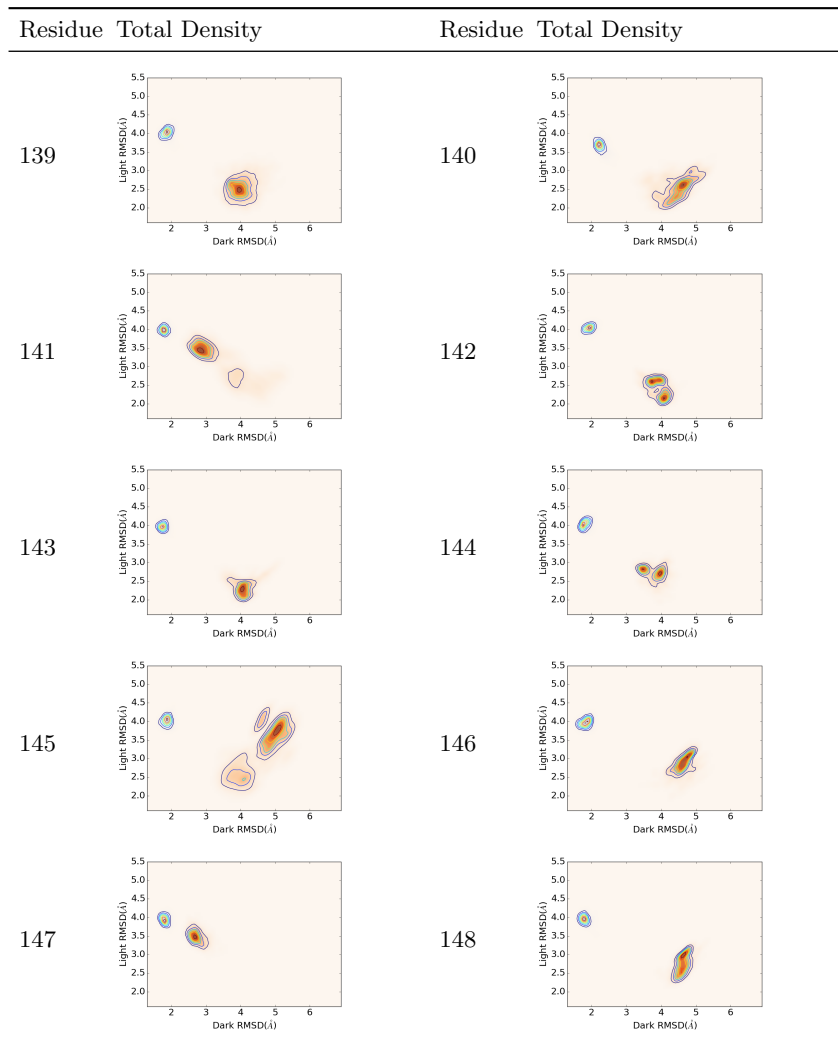

Table S3: Distributions (%) of the unperturbed and RRS simulations of VVD Dark and Light states among 15 clusters.

| Type | Res | Cluster |      |      |      |      |      |     |     |     |     |     |     |     |     |     |
|------|-----|---------|------|------|------|------|------|-----|-----|-----|-----|-----|-----|-----|-----|-----|
|      |     | 1       | 2    | 3    | 4    | 5    | 6    | 7   | 8   | 9   | 10  | 11  | 12  | 13  | 14  | 15  |
| Dark | 0   | 18.9    | 10.3 | 18.3 | 18.2 | 15.7 | 0.2  | 3.9 | 3.2 | 9.1 | 1.4 | 0.1 | 0.6 | 0.0 | 0.0 | 0.0 |
| Dark | 1   | 97.7    | 0.0  | 0.0  | 0.0  | 0.0  | 2.3  | 0.0 | 0.0 | 0.0 | 0.0 | 0.0 | 0.0 | 0.0 | 0.0 | 0.0 |
| Dark | 2   | 99.9    | 0.1  | 0.0  | 0.0  | 0.0  | 0.0  | 0.0 | 0.0 | 0.0 | 0.0 | 0.0 | 0.0 | 0.0 | 0.0 | 0.0 |
| Dark | 3   | 100.0   | 0.0  | 0.0  | 0.0  | 0.0  | 0.0  | 0.0 | 0.0 | 0.0 | 0.0 | 0.0 | 0.0 | 0.0 | 0.0 | 0.0 |
| Dark | 4   | 100.0   | 0.0  | 0.0  | 0.0  | 0.0  | 0.0  | 0.0 | 0.0 | 0.0 | 0.0 | 0.0 | 0.0 | 0.0 | 0.0 | 0.0 |
| Dark | 5   | 98.4    | 1.1  | 0.0  | 0.0  | 0.0  | 0.5  | 0.0 | 0.0 | 0.0 | 0.0 | 0.0 | 0.0 | 0.0 | 0.0 | 0.0 |
| Dark | 6   | 99.9    | 0.1  | 0.0  | 0.0  | 0.0  | 0.0  | 0.0 | 0.0 | 0.0 | 0.0 | 0.0 | 0.0 | 0.0 | 0.0 | 0.0 |
| Dark | 7   | 98.4    | 1.6  | 0.0  | 0.0  | 0.0  | 0.0  | 0.0 | 0.0 | 0.0 | 0.0 | 0.0 | 0.0 | 0.0 | 0.0 | 0.0 |
| Dark | 8   | 99.7    | 0.3  | 0.0  | 0.0  | 0.0  | 0.0  | 0.0 | 0.0 | 0.0 | 0.0 | 0.0 | 0.0 | 0.0 | 0.0 | 0.0 |
| Dark | 9   | 100.0   | 0.0  | 0.0  | 0.0  | 0.0  | 0.0  | 0.0 | 0.0 | 0.0 | 0.0 | 0.0 | 0.0 | 0.0 | 0.0 | 0.0 |
| Dark | 10  | 100.0   | 0.0  | 0.0  | 0.0  | 0.0  | 0.0  | 0.0 | 0.0 | 0.0 | 0.0 | 0.0 | 0.0 | 0.0 | 0.0 | 0.0 |
| Dark | 11  | 99.6    | 0.2  | 0.0  | 0.0  | 0.0  | 0.2  | 0.0 | 0.0 | 0.0 | 0.0 | 0.0 | 0.0 | 0.0 | 0.0 | 0.0 |
| Dark | 12  | 82.3    | 16.6 | 0.5  | 0.0  | 0.0  | 0.6  | 0.0 | 0.0 | 0.0 | 0.0 | 0.0 | 0.0 | 0.0 | 0.0 | 0.0 |
| Dark | 13  | 96.1    | 1.3  | 0.0  | 0.0  | 0.0  | 2.7  | 0.0 | 0.0 | 0.0 | 0.0 | 0.0 | 0.0 | 0.0 | 0.0 | 0.0 |
| Dark | 14  | 99.6    | 0.1  | 0.0  | 0.0  | 0.0  | 0.3  | 0.0 | 0.0 | 0.0 | 0.0 | 0.0 | 0.0 | 0.0 | 0.0 | 0.0 |
| Dark | 15  | 79.1    | 20.8 | 0.0  | 0.0  | 0.0  | 0.0  | 0.0 | 0.0 | 0.0 | 0.0 | 0.0 | 0.0 | 0.0 | 0.0 | 0.0 |
| Dark | 16  | 98.3    | 1.7  | 0.0  | 0.0  | 0.0  | 0.0  | 0.0 | 0.0 | 0.0 | 0.0 | 0.0 | 0.0 | 0.0 | 0.0 | 0.0 |
| Dark | 17  | 99.3    | 0.7  | 0.0  | 0.0  | 0.0  | 0.0  | 0.0 | 0.0 | 0.0 | 0.0 | 0.0 | 0.0 | 0.0 | 0.0 | 0.0 |
| Dark | 18  | 92.1    | 5.7  | 0.0  | 0.0  | 0.0  | 2.2  | 0.0 | 0.0 | 0.0 | 0.0 | 0.0 | 0.0 | 0.0 | 0.0 | 0.0 |
| Dark | 19  | 99.6    | 0.4  | 0.0  | 0.0  | 0.0  | 0.0  | 0.0 | 0.0 | 0.0 | 0.0 | 0.0 | 0.0 | 0.0 | 0.0 | 0.0 |
| Dark | 20  | 73.1    | 26.7 | 0.0  | 0.0  | 0.0  | 0.2  | 0.0 | 0.0 | 0.0 | 0.0 | 0.0 | 0.0 | 0.0 | 0.0 | 0.0 |
| Dark | 21  | 100.0   | 0.0  | 0.0  | 0.0  | 0.0  | 0.0  | 0.0 | 0.0 | 0.0 | 0.0 | 0.0 | 0.0 | 0.0 | 0.0 | 0.0 |
| Dark | 22  | 98.8    | 1.2  | 0.0  | 0.0  | 0.0  | 0.1  | 0.0 | 0.0 | 0.0 | 0.0 | 0.0 | 0.0 | 0.0 | 0.0 | 0.0 |
| Dark | 23  | 99.7    | 0.3  | 0.0  | 0.0  | 0.0  | 0.1  | 0.0 | 0.0 | 0.0 | 0.0 | 0.0 | 0.0 | 0.0 | 0.0 | 0.0 |
| Dark | 24  | 99.8    | 0.2  | 0.0  | 0.0  | 0.0  | 0.0  | 0.0 | 0.0 | 0.0 | 0.0 | 0.0 | 0.0 | 0.0 | 0.0 | 0.0 |
| Dark | 25  | 100.0   | 0.0  | 0.0  | 0.0  | 0.0  | 0.0  | 0.0 | 0.0 | 0.0 | 0.0 | 0.0 | 0.0 | 0.0 | 0.0 | 0.0 |
| Dark | 26  | 37.5    | 50.7 | 0.0  | 0.0  | 0.0  | 11.8 | 0.0 | 0.0 | 0.0 | 0.0 | 0.0 | 0.0 | 0.0 | 0.0 | 0.0 |
| Dark | 27  | 30.5    | 34.8 | 8.2  | 0.0  | 0.0  | 26.5 | 0.0 | 0.0 | 0.0 | 0.0 | 0.0 | 0.0 | 0.0 | 0.0 | 0.0 |
| Dark | 28  | 100.0   | 0.0  | 0.0  | 0.0  | 0.0  | 0.0  | 0.0 | 0.0 | 0.0 | 0.0 | 0.0 | 0.0 | 0.0 | 0.0 | 0.0 |
| Dark | 29  | 98.1    | 0.1  | 0.0  | 0.0  | 0.0  | 1.8  | 0.0 | 0.0 | 0.0 | 0.0 | 0.0 | 0.0 | 0.0 | 0.0 | 0.0 |
| Dark | 30  | 99.7    | 0.3  | 0.0  | 0.0  | 0.0  | 0.0  | 0.0 | 0.0 | 0.0 | 0.0 | 0.0 | 0.0 | 0.0 | 0.0 | 0.0 |
| Dark | 31  | 25.4    | 58.9 | 14.5 | 0.0  | 0.0  | 1.2  | 0.0 | 0.0 | 0.0 | 0.0 | 0.0 | 0.0 | 0.0 | 0.0 | 0.0 |
| Dark | 32  | 99.8    | 0.1  | 0.0  | 0.0  | 0.0  | 0.0  | 0.0 | 0.0 | 0.0 | 0.0 | 0.0 | 0.0 | 0.0 | 0.0 | 0.0 |
| Dark | 33  | 99.7    | 0.3  | 0.0  | 0.0  | 0.0  | 0.0  | 0.0 | 0.0 | 0.0 | 0.0 | 0.0 | 0.0 | 0.0 | 0.0 | 0.0 |
| Dark | 34  | 99.8    | 0.2  | 0.0  | 0.0  | 0.0  | 0.1  | 0.0 | 0.0 | 0.0 | 0.0 | 0.0 | 0.0 | 0.0 | 0.0 | 0.0 |
| Dark | 35  | 98.8    | 1.2  | 0.0  | 0.0  | 0.0  | 0.0  | 0.0 | 0.0 | 0.0 | 0.0 | 0.0 | 0.0 | 0.0 | 0.0 | 0.0 |
| Dark | 36  | 93.9    | 0.2  | 0.0  | 0.0  | 0.0  | 5.9  | 0.0 | 0.0 | 0.0 | 0.0 | 0.0 | 0.0 | 0.0 | 0.0 | 0.0 |
| Dark | 37  | 99.3    | 0.7  | 0.0  | 0.0  | 0.0  | 0.0  | 0.0 | 0.0 | 0.0 | 0.0 | 0.0 | 0.0 | 0.0 | 0.0 | 0.0 |
| Dark | 38  | 98.3    | 0.1  | 0.0  | 0.0  | 0.0  | 1.6  | 0.0 | 0.0 | 0.0 | 0.0 | 0.0 | 0.0 | 0.0 | 0.0 | 0.0 |
| Dark | 39  | 35.4    | 5.9  | 57.6 | 1.0  | 0.0  | 0.0  | 0.0 | 0.0 | 0.0 | 0.0 | 0.0 | 0.0 | 0.0 | 0.0 | 0.0 |
| Dark | 40  | 99.9    | 0.1  | 0.0  | 0.0  | 0.0  | 0.0  | 0.0 | 0.0 | 0.0 | 0.0 | 0.0 | 0.0 | 0.0 | 0.0 | 0.0 |
| Dark | 41  | 99.8    | 0.2  | 0.0  | 0.0  | 0.0  | 0.0  | 0.0 | 0.0 | 0.0 | 0.0 | 0.0 | 0.0 | 0.0 | 0.0 | 0.0 |
| Dark | 42  | 99.7    | 0.3  | 0.0  | 0.0  | 0.0  | 0.0  | 0.0 | 0.0 | 0.0 | 0.0 | 0.0 | 0.0 | 0.0 | 0.0 | 0.0 |
| Dark | 43  | 99.5    | 0.5  | 0.0  | 0.0  | 0.0  | 0.0  | 0.0 | 0.0 | 0.0 | 0.0 | 0.0 | 0.0 | 0.0 | 0.0 | 0.0 |
| Dark | 44  | 99.6    | 0.4  | 0.0  | 0.0  | 0.0  | 0.0  | 0.0 | 0.0 | 0.0 | 0.0 | 0.0 | 0.0 | 0.0 | 0.0 | 0.0 |
| Dark | 45  | 99.4    | 0.0  | 0.0  | 0.0  | 0.0  | 0.6  | 0.0 | 0.0 | 0.0 | 0.0 | 0.0 | 0.0 | 0.0 | 0.0 | 0.0 |
| Dark | 46  | 98.3    | 0.8  | 0.0  | 0.0  | 0.0  | 0.9  | 0.0 | 0.0 | 0.0 | 0.0 | 0.0 | 0.0 | 0.0 | 0.0 | 0.0 |
| Dark | 47  | 94.4    | 4.7  | 0.0  | 0.0  | 0.0  | 0.9  | 0.0 | 0.0 | 0.0 | 0.0 | 0.0 | 0.0 | 0.0 | 0.0 | 0.0 |

Table S3: Distributions (%) of the unperturbed and RRS simulations of VVD Dark and Light states among 15 clusters.

| Type | Res | Cluster |      |      |     |     |      |     |     |     |     |     |     |     |     |     |
|------|-----|---------|------|------|-----|-----|------|-----|-----|-----|-----|-----|-----|-----|-----|-----|
|      |     | 1       | 2    | 3    | 4   | 5   | 6    | 7   | 8   | 9   | 10  | 11  | 12  | 13  | 14  | 15  |
| Dark | 48  | 99.8    | 0.2  | 0.0  | 0.0 | 0.0 | 0.0  | 0.0 | 0.0 | 0.0 | 0.0 | 0.0 | 0.0 | 0.0 | 0.0 | 0.0 |
| Dark | 49  | 93.5    | 6.4  | 0.0  | 0.0 | 0.0 | 0.1  | 0.0 | 0.0 | 0.0 | 0.0 | 0.0 | 0.0 | 0.0 | 0.0 | 0.0 |
| Dark | 50  | 98.7    | 1.3  | 0.0  | 0.0 | 0.0 | 0.0  | 0.0 | 0.0 | 0.0 | 0.0 | 0.0 | 0.0 | 0.0 | 0.0 | 0.0 |
| Dark | 51  | 78.1    | 20.9 | 0.3  | 0.0 | 0.0 | 0.8  | 0.0 | 0.0 | 0.0 | 0.0 | 0.0 | 0.0 | 0.0 | 0.0 | 0.0 |
| Dark | 52  | 99.8    | 0.1  | 0.0  | 0.0 | 0.0 | 0.0  | 0.0 | 0.0 | 0.0 | 0.0 | 0.0 | 0.0 | 0.0 | 0.0 | 0.0 |
| Dark | 53  | 99.9    | 0.1  | 0.0  | 0.0 | 0.0 | 0.0  | 0.0 | 0.0 | 0.0 | 0.0 | 0.0 | 0.0 | 0.0 | 0.0 | 0.0 |
| Dark | 54  | 99.1    | 0.9  | 0.0  | 0.0 | 0.0 | 0.0  | 0.0 | 0.0 | 0.0 | 0.0 | 0.0 | 0.0 | 0.0 | 0.0 | 0.0 |
| Dark | 55  | 27.8    | 65.0 | 6.6  | 0.0 | 0.0 | 0.6  | 0.0 | 0.0 | 0.0 | 0.0 | 0.0 | 0.0 | 0.0 | 0.0 | 0.0 |
| Dark | 56  | 99.9    | 0.1  | 0.0  | 0.0 | 0.0 | 0.0  | 0.0 | 0.0 | 0.0 | 0.0 | 0.0 | 0.0 | 0.0 | 0.0 | 0.0 |
| Dark | 57  | 100.0   | 0.0  | 0.0  | 0.0 | 0.0 | 0.0  | 0.0 | 0.0 | 0.0 | 0.0 | 0.0 | 0.0 | 0.0 | 0.0 | 0.0 |
| Dark | 58  | 28.5    | 33.8 | 37.2 | 0.5 | 0.0 | 0.0  | 0.0 | 0.0 | 0.0 | 0.0 | 0.0 | 0.0 | 0.0 | 0.0 | 0.0 |
| Dark | 59  | 98.8    | 1.2  | 0.0  | 0.0 | 0.0 | 0.0  | 0.0 | 0.0 | 0.0 | 0.0 | 0.0 | 0.0 | 0.0 | 0.0 | 0.0 |
| Dark | 60  | 98.9    | 1.1  | 0.0  | 0.0 | 0.0 | 0.0  | 0.0 | 0.0 | 0.0 | 0.0 | 0.0 | 0.0 | 0.0 | 0.0 | 0.0 |
| Dark | 61  | 100.0   | 0.0  | 0.0  | 0.0 | 0.0 | 0.0  | 0.0 | 0.0 | 0.0 | 0.0 | 0.0 | 0.0 | 0.0 | 0.0 | 0.0 |
| Dark | 62  | 99.9    | 0.1  | 0.0  | 0.0 | 0.0 | 0.0  | 0.0 | 0.0 | 0.0 | 0.0 | 0.0 | 0.0 | 0.0 | 0.0 | 0.0 |
| Dark | 63  | 100.0   | 0.0  | 0.0  | 0.0 | 0.0 | 0.0  | 0.0 | 0.0 | 0.0 | 0.0 | 0.0 | 0.0 | 0.0 | 0.0 | 0.0 |
| Dark | 64  | 98.0    | 1.2  | 0.0  | 0.0 | 0.0 | 0.9  | 0.0 | 0.0 | 0.0 | 0.0 | 0.0 | 0.0 | 0.0 | 0.0 | 0.0 |
| Dark | 65  | 98.1    | 1.8  | 0.0  | 0.0 | 0.0 | 0.1  | 0.0 | 0.0 | 0.0 | 0.0 | 0.0 | 0.0 | 0.0 | 0.0 | 0.0 |
| Dark | 66  | 99.9    | 0.1  | 0.0  | 0.0 | 0.0 | 0.0  | 0.0 | 0.0 | 0.0 | 0.0 | 0.0 | 0.0 | 0.0 | 0.0 | 0.0 |
| Dark | 67  | 85.1    | 14.9 | 0.0  | 0.0 | 0.0 | 0.0  | 0.0 | 0.0 | 0.0 | 0.0 | 0.0 | 0.0 | 0.0 | 0.0 | 0.0 |
| Dark | 68  | 99.1    | 0.9  | 0.0  | 0.0 | 0.0 | 0.0  | 0.0 | 0.0 | 0.0 | 0.0 | 0.0 | 0.0 | 0.0 | 0.0 | 0.0 |
| Dark | 69  | 99.9    | 0.1  | 0.0  | 0.0 | 0.0 | 0.0  | 0.0 | 0.0 | 0.0 | 0.0 | 0.0 | 0.0 | 0.0 | 0.0 | 0.0 |
| Dark | 70  | 29.6    | 42.6 | 14.9 | 2.1 | 0.0 | 10.8 | 0.0 | 0.0 | 0.0 | 0.0 | 0.0 | 0.0 | 0.0 | 0.0 | 0.0 |
| Dark | 71  | 99.9    | 0.0  | 0.0  | 0.0 | 0.0 | 0.1  | 0.0 | 0.0 | 0.0 | 0.0 | 0.0 | 0.0 | 0.0 | 0.0 | 0.0 |
| Dark | 72  | 94.1    | 0.8  | 0.0  | 0.0 | 0.0 | 5.1  | 0.0 | 0.0 | 0.0 | 0.0 | 0.0 | 0.0 | 0.0 | 0.0 | 0.0 |
| Dark | 73  | 99.9    | 0.1  | 0.0  | 0.0 | 0.0 | 0.0  | 0.0 | 0.0 | 0.0 | 0.0 | 0.0 | 0.0 | 0.0 | 0.0 | 0.0 |
| Dark | 74  | 100.0   | 0.0  | 0.0  | 0.0 | 0.0 | 0.0  | 0.0 | 0.0 | 0.0 | 0.0 | 0.0 | 0.0 | 0.0 | 0.0 | 0.0 |
| Dark | 75  | 100.0   | 0.0  | 0.0  | 0.0 | 0.0 | 0.0  | 0.0 | 0.0 | 0.0 | 0.0 | 0.0 | 0.0 | 0.0 | 0.0 | 0.0 |
| Dark | 76  | 99.7    | 0.3  | 0.0  | 0.0 | 0.0 | 0.0  | 0.0 | 0.0 | 0.0 | 0.0 | 0.0 | 0.0 | 0.0 | 0.0 | 0.0 |
| Dark | 77  | 99.9    | 0.1  | 0.0  | 0.0 | 0.0 | 0.0  | 0.0 | 0.0 | 0.0 | 0.0 | 0.0 | 0.0 | 0.0 | 0.0 | 0.0 |
| Dark | 78  | 92.2    | 6.7  | 1.1  | 0.0 | 0.0 | 0.0  | 0.0 | 0.0 | 0.0 | 0.0 | 0.0 | 0.0 | 0.0 | 0.0 | 0.0 |
| Dark | 79  | 98.0    | 2.0  | 0.0  | 0.0 | 0.0 | 0.0  | 0.0 | 0.0 | 0.0 | 0.0 | 0.0 | 0.0 | 0.0 | 0.0 | 0.0 |
| Dark | 80  | 99.8    | 0.2  | 0.0  | 0.0 | 0.0 | 0.0  | 0.0 | 0.0 | 0.0 | 0.0 | 0.0 | 0.0 | 0.0 | 0.0 | 0.0 |
| Dark | 81  | 99.5    | 0.4  | 0.0  | 0.0 | 0.0 | 0.0  | 0.0 | 0.0 | 0.0 | 0.0 | 0.0 | 0.0 | 0.0 | 0.0 | 0.0 |
| Dark | 82  | 100.0   | 0.0  | 0.0  | 0.0 | 0.0 | 0.0  | 0.0 | 0.0 | 0.0 | 0.0 | 0.0 | 0.0 | 0.0 | 0.0 | 0.0 |
| Dark | 83  | 100.0   | 0.0  | 0.0  | 0.0 | 0.0 | 0.0  | 0.0 | 0.0 | 0.0 | 0.0 | 0.0 | 0.0 | 0.0 | 0.0 | 0.0 |
| Dark | 84  | 99.9    | 0.1  | 0.0  | 0.0 | 0.0 | 0.0  | 0.0 | 0.0 | 0.0 | 0.0 | 0.0 | 0.0 | 0.0 | 0.0 | 0.0 |
| Dark | 85  | 99.9    | 0.1  | 0.0  | 0.0 | 0.0 | 0.0  | 0.0 | 0.0 | 0.0 | 0.0 | 0.0 | 0.0 | 0.0 | 0.0 | 0.0 |
| Dark | 86  | 100.0   | 0.0  | 0.0  | 0.0 | 0.0 | 0.0  | 0.0 | 0.0 | 0.0 | 0.0 | 0.0 | 0.0 | 0.0 | 0.0 | 0.0 |
| Dark | 87  | 99.8    | 0.1  | 0.0  | 0.0 | 0.0 | 0.2  | 0.0 | 0.0 | 0.0 | 0.0 | 0.0 | 0.0 | 0.0 | 0.0 | 0.0 |
| Dark | 88  | 99.7    | 0.3  | 0.0  | 0.0 | 0.0 | 0.0  | 0.0 | 0.0 | 0.0 | 0.0 | 0.0 | 0.0 | 0.0 | 0.0 | 0.0 |
| Dark | 89  | 85.5    | 8.5  | 0.0  | 0.0 | 0.0 | 6.0  | 0.0 | 0.0 | 0.0 | 0.0 | 0.0 | 0.0 | 0.0 | 0.0 | 0.0 |
| Dark | 90  | 99.8    | 0.2  | 0.0  | 0.0 | 0.0 | 0.0  | 0.0 | 0.0 | 0.0 | 0.0 | 0.0 | 0.0 | 0.0 | 0.0 | 0.0 |
| Dark | 91  | 99.4    | 0.6  | 0.0  | 0.0 | 0.0 | 0.0  | 0.0 | 0.0 | 0.0 | 0.0 | 0.0 | 0.0 | 0.0 | 0.0 | 0.0 |
| Dark | 92  | 100.0   | 0.0  | 0.0  | 0.0 | 0.0 | 0.0  | 0.0 | 0.0 | 0.0 | 0.0 | 0.0 | 0.0 | 0.0 | 0.0 | 0.0 |
| Dark | 93  | 99.9    | 0.1  | 0.0  | 0.0 | 0.0 | 0.0  | 0.0 | 0.0 | 0.0 | 0.0 | 0.0 | 0.0 | 0.0 | 0.0 | 0.0 |
| Dark | 94  | 100.0   | 0.0  | 0.0  | 0.0 | 0.0 | 0.0  | 0.0 | 0.0 | 0.0 | 0.0 | 0.0 | 0.0 | 0.0 | 0.0 | 0.0 |
| Dark | 95  | 99.4    | 0.0  | 0.0  | 0.0 | 0.0 | 0.5  | 0.0 | 0.0 | 0.0 | 0.0 | 0.0 | 0.0 | 0.0 | 0.0 | 0.0 |

Table S3: Distributions (%) of the unperturbed and RRS simulations of VVD Dark and Light states among 15 clusters.

| Type | Res | Cluster |      |      |     |     |      |     |     |     |     |     |     |     |     |     |
|------|-----|---------|------|------|-----|-----|------|-----|-----|-----|-----|-----|-----|-----|-----|-----|
|      |     | 1       | 2    | 3    | 4   | 5   | 6    | 7   | 8   | 9   | 10  | 11  | 12  | 13  | 14  | 15  |
| Dark | 96  | 91.2    | 1.4  | 0.0  | 0.0 | 0.0 | 7.4  | 0.0 | 0.0 | 0.0 | 0.0 | 0.0 | 0.0 | 0.0 | 0.0 | 0.0 |
| Dark | 97  | 86.1    | 11.4 | 2.4  | 0.0 | 0.0 | 0.0  | 0.0 | 0.0 | 0.0 | 0.0 | 0.0 | 0.0 | 0.0 | 0.0 | 0.0 |
| Dark | 98  | 99.9    | 0.1  | 0.0  | 0.0 | 0.0 | 0.0  | 0.0 | 0.0 | 0.0 | 0.0 | 0.0 | 0.0 | 0.0 | 0.0 | 0.0 |
| Dark | 99  | 100.0   | 0.0  | 0.0  | 0.0 | 0.0 | 0.0  | 0.0 | 0.0 | 0.0 | 0.0 | 0.0 | 0.0 | 0.0 | 0.0 | 0.0 |
| Dark | 100 | 100.0   | 0.0  | 0.0  | 0.0 | 0.0 | 0.0  | 0.0 | 0.0 | 0.0 | 0.0 | 0.0 | 0.0 | 0.0 | 0.0 | 0.0 |
| Dark | 101 | 99.0    | 1.0  | 0.0  | 0.0 | 0.0 | 0.0  | 0.0 | 0.0 | 0.0 | 0.0 | 0.0 | 0.0 | 0.0 | 0.0 | 0.0 |
| Dark | 102 | 67.8    | 31.2 | 0.6  | 0.0 | 0.0 | 0.4  | 0.0 | 0.0 | 0.0 | 0.0 | 0.0 | 0.0 | 0.0 | 0.0 | 0.0 |
| Dark | 103 | 99.7    | 0.2  | 0.0  | 0.0 | 0.0 | 0.1  | 0.0 | 0.0 | 0.0 | 0.0 | 0.0 | 0.0 | 0.0 | 0.0 | 0.0 |
| Dark | 104 | 89.0    | 3.9  | 6.3  | 0.5 | 0.0 | 0.0  | 0.0 | 0.0 | 0.0 | 0.0 | 0.3 | 0.0 | 0.0 | 0.0 | 0.0 |
| Dark | 105 | 99.7    | 0.3  | 0.0  | 0.0 | 0.0 | 0.0  | 0.0 | 0.0 | 0.0 | 0.0 | 0.0 | 0.0 | 0.0 | 0.0 | 0.0 |
| Dark | 106 | 59.8    | 38.2 | 0.0  | 0.0 | 0.0 | 1.9  | 0.0 | 0.0 | 0.0 | 0.0 | 0.0 | 0.0 | 0.0 | 0.0 | 0.0 |
| Dark | 107 | 98.8    | 1.1  | 0.0  | 0.0 | 0.0 | 0.1  | 0.0 | 0.0 | 0.0 | 0.0 | 0.0 | 0.0 | 0.0 | 0.0 | 0.0 |
| Dark | 108 | 100.0   | 0.0  | 0.0  | 0.0 | 0.0 | 0.0  | 0.0 | 0.0 | 0.0 | 0.0 | 0.0 | 0.0 | 0.0 | 0.0 | 0.0 |
| Dark | 109 | 66.1    | 29.4 | 4.4  | 0.0 | 0.0 | 0.1  | 0.0 | 0.0 | 0.0 | 0.0 | 0.0 | 0.0 | 0.0 | 0.0 | 0.0 |
| Dark | 110 | 79.1    | 12.7 | 0.0  | 0.0 | 0.0 | 8.1  | 0.0 | 0.0 | 0.0 | 0.0 | 0.0 | 0.0 | 0.0 | 0.0 | 0.0 |
| Dark | 111 | 99.8    | 0.2  | 0.0  | 0.0 | 0.0 | 0.0  | 0.0 | 0.0 | 0.0 | 0.0 | 0.0 | 0.0 | 0.0 | 0.0 | 0.0 |
| Dark | 112 | 22.3    | 58.0 | 12.4 | 0.1 | 0.0 | 7.3  | 0.0 | 0.0 | 0.0 | 0.0 | 0.0 | 0.0 | 0.0 | 0.0 | 0.0 |
| Dark | 113 | 99.7    | 0.3  | 0.0  | 0.0 | 0.0 | 0.0  | 0.0 | 0.0 | 0.0 | 0.0 | 0.0 | 0.0 | 0.0 | 0.0 | 0.0 |
| Dark | 114 | 93.8    | 0.8  | 0.0  | 0.0 | 0.0 | 5.4  | 0.0 | 0.0 | 0.0 | 0.0 | 0.0 | 0.0 | 0.0 | 0.0 | 0.0 |
| Dark | 115 | 100.0   | 0.0  | 0.0  | 0.0 | 0.0 | 0.0  | 0.0 | 0.0 | 0.0 | 0.0 | 0.0 | 0.0 | 0.0 | 0.0 | 0.0 |
| Dark | 116 | 99.7    | 0.2  | 0.0  | 0.0 | 0.0 | 0.1  | 0.0 | 0.0 | 0.0 | 0.0 | 0.0 | 0.0 | 0.0 | 0.0 | 0.0 |
| Dark | 117 | 58.2    | 8.4  | 0.2  | 0.0 | 0.0 | 33.2 | 0.0 | 0.0 | 0.0 | 0.0 | 0.0 | 0.0 | 0.0 | 0.0 | 0.0 |
| Dark | 118 | 99.9    | 0.1  | 0.0  | 0.0 | 0.0 | 0.0  | 0.0 | 0.0 | 0.0 | 0.0 | 0.0 | 0.0 | 0.0 | 0.0 | 0.0 |
| Dark | 119 | 99.8    | 0.2  | 0.0  | 0.0 | 0.0 | 0.0  | 0.0 | 0.0 | 0.0 | 0.0 | 0.0 | 0.0 | 0.0 | 0.0 | 0.0 |
| Dark | 120 | 3.8     | 78.2 | 10.3 | 1.7 | 0.3 | 4.1  | 0.7 | 0.3 | 0.3 | 0.0 | 0.3 | 0.0 | 0.0 | 0.0 | 0.0 |
| Dark | 121 | 99.2    | 0.8  | 0.0  | 0.0 | 0.0 | 0.0  | 0.0 | 0.0 | 0.0 | 0.0 | 0.0 | 0.0 | 0.0 | 0.0 | 0.0 |
| Dark | 122 | 99.5    | 0.5  | 0.0  | 0.0 | 0.0 | 0.0  | 0.0 | 0.0 | 0.0 | 0.0 | 0.0 | 0.0 | 0.0 | 0.0 | 0.0 |
| Dark | 123 | 99.3    | 0.6  | 0.0  | 0.0 | 0.0 | 0.1  | 0.0 | 0.0 | 0.0 | 0.0 | 0.0 | 0.0 | 0.0 | 0.0 | 0.0 |
| Dark | 124 | 11.4    | 18.6 | 68.1 | 1.9 | 0.0 | 0.0  | 0.0 | 0.0 | 0.0 | 0.0 | 0.0 | 0.0 | 0.0 | 0.0 | 0.0 |
| Dark | 125 | 99.0    | 1.0  | 0.0  | 0.0 | 0.0 | 0.0  | 0.0 | 0.0 | 0.0 | 0.0 | 0.0 | 0.0 | 0.0 | 0.0 | 0.0 |
| Dark | 126 | 99.7    | 0.3  | 0.0  | 0.0 | 0.0 | 0.0  | 0.0 | 0.0 | 0.0 | 0.0 | 0.0 | 0.0 | 0.0 | 0.0 | 0.0 |
| Dark | 127 | 92.6    | 6.7  | 0.2  | 0.0 | 0.0 | 0.6  | 0.0 | 0.0 | 0.0 | 0.0 | 0.0 | 0.0 | 0.0 | 0.0 | 0.0 |
| Dark | 128 | 99.9    | 0.1  | 0.0  | 0.0 | 0.0 | 0.0  | 0.0 | 0.0 | 0.0 | 0.0 | 0.0 | 0.0 | 0.0 | 0.0 | 0.0 |
| Dark | 129 | 99.3    | 0.7  | 0.0  | 0.0 | 0.0 | 0.0  | 0.0 | 0.0 | 0.0 | 0.0 | 0.0 | 0.0 | 0.0 | 0.0 | 0.0 |
| Dark | 130 | 99.8    | 0.2  | 0.0  | 0.0 | 0.0 | 0.0  | 0.0 | 0.0 | 0.0 | 0.0 | 0.0 | 0.0 | 0.0 | 0.0 | 0.0 |
| Dark | 131 | 60.2    | 28.7 | 7.1  | 0.0 | 0.0 | 4.0  | 0.0 | 0.0 | 0.0 | 0.0 | 0.0 | 0.0 | 0.0 | 0.0 | 0.0 |
| Dark | 132 | 99.9    | 0.1  | 0.0  | 0.0 | 0.0 | 0.0  | 0.0 | 0.0 | 0.0 | 0.0 | 0.0 | 0.0 | 0.0 | 0.0 | 0.0 |
| Dark | 133 | 99.7    | 0.1  | 0.0  | 0.0 | 0.0 | 0.2  | 0.0 | 0.0 | 0.0 | 0.0 | 0.0 | 0.0 | 0.0 | 0.0 | 0.0 |
| Dark | 134 | 28.8    | 59.7 | 0.8  | 0.0 | 0.0 | 10.7 | 0.0 | 0.0 | 0.0 | 0.0 | 0.0 | 0.0 | 0.0 | 0.0 | 0.0 |
| Dark | 135 | 95.4    | 3.4  | 0.0  | 0.0 | 0.0 | 1.2  | 0.0 | 0.0 | 0.0 | 0.0 | 0.0 | 0.0 | 0.0 | 0.0 | 0.0 |
| Dark | 136 | 99.1    | 0.8  | 0.0  | 0.0 | 0.0 | 0.2  | 0.0 | 0.0 | 0.0 | 0.0 | 0.0 | 0.0 | 0.0 | 0.0 | 0.0 |
| Dark | 137 | 100.0   | 0.0  | 0.0  | 0.0 | 0.0 | 0.0  | 0.0 | 0.0 | 0.0 | 0.0 | 0.0 | 0.0 | 0.0 | 0.0 | 0.0 |
| Dark | 138 | 99.5    | 0.5  | 0.0  | 0.0 | 0.0 | 0.0  | 0.0 | 0.0 | 0.0 | 0.0 | 0.0 | 0.0 | 0.0 | 0.0 | 0.0 |
| Dark | 139 | 99.0    | 1.0  | 0.0  | 0.0 | 0.0 | 0.0  | 0.0 | 0.0 | 0.0 | 0.0 | 0.0 | 0.0 | 0.0 | 0.0 | 0.0 |
| Dark | 140 | 8.2     | 90.9 | 0.8  | 0.0 | 0.0 | 0.1  | 0.0 | 0.0 | 0.0 | 0.0 | 0.0 | 0.0 | 0.0 | 0.0 | 0.0 |
| Dark | 141 | 100.0   | 0.0  | 0.0  | 0.0 | 0.0 | 0.0  | 0.0 | 0.0 | 0.0 | 0.0 | 0.0 | 0.0 | 0.0 | 0.0 | 0.0 |
| Dark | 142 | 99.9    | 0.1  | 0.0  | 0.0 | 0.0 | 0.1  | 0.0 | 0.0 | 0.0 | 0.0 | 0.0 | 0.0 | 0.0 | 0.0 | 0.0 |
| Dark | 143 | 100.0   | 0.0  | 0.0  | 0.0 | 0.0 | 0.0  | 0.0 | 0.0 | 0.0 | 0.0 | 0.0 | 0.0 | 0.0 | 0.0 | 0.0 |



Table S3: Distributions (%) of the unperturbed and RRS simulations of VVD Dark and Light states among 15 clusters.

| Type  | Res | Cluster |      |      |      |      |      |      |      |      |      |     |      |      |      |     |
|-------|-----|---------|------|------|------|------|------|------|------|------|------|-----|------|------|------|-----|
|       |     | 1       | 2    | 3    | 4    | 5    | 6    | 7    | 8    | 9    | 10   | 11  | 12   | 13   | 14   | 15  |
| Dark  | 144 | 100.0   | 0.0  | 0.0  | 0.0  | 0.0  | 0.0  | 0.0  | 0.0  | 0.0  | 0.0  | 0.0 | 0.0  | 0.0  | 0.0  | 0.0 |
| Dark  | 145 | 100.0   | 0.0  | 0.0  | 0.0  | 0.0  | 0.0  | 0.0  | 0.0  | 0.0  | 0.0  | 0.0 | 0.0  | 0.0  | 0.0  | 0.0 |
| Dark  | 146 | 100.0   | 0.0  | 0.0  | 0.0  | 0.0  | 0.0  | 0.0  | 0.0  | 0.0  | 0.0  | 0.0 | 0.0  | 0.0  | 0.0  | 0.0 |
| Dark  | 147 | 99.8    | 0.2  | 0.0  | 0.0  | 0.0  | 0.0  | 0.0  | 0.0  | 0.0  | 0.0  | 0.0 | 0.0  | 0.0  | 0.0  | 0.0 |
| Dark  | 148 | 99.2    | 0.8  | 0.0  | 0.0  | 0.0  | 0.0  | 0.0  | 0.0  | 0.0  | 0.0  | 0.0 | 0.0  | 0.0  | 0.0  | 0.0 |
| Light | 0   | 0.0     | 0.0  | 0.0  | 0.0  | 0.2  | 0.0  | 5.0  | 6.1  | 20.8 | 49.6 | 0.0 | 0.7  | 14.5 | 1.8  | 1.2 |
| Light | 1   | 0.0     | 0.0  | 0.0  | 0.0  | 1.2  | 0.0  | 45.2 | 52.3 | 1.1  | 0.3  | 0.0 | 0.0  | 0.0  | 0.0  | 0.0 |
| Light | 2   | 0.0     | 0.0  | 0.0  | 0.1  | 0.0  | 0.0  | 88.9 | 10.9 | 0.1  | 0.0  | 0.0 | 0.0  | 0.0  | 0.0  | 0.0 |
| Light | 3   | 0.0     | 0.0  | 0.0  | 0.1  | 0.0  | 0.0  | 95.9 | 4.0  | 0.1  | 0.0  | 0.0 | 0.0  | 0.0  | 0.0  | 0.0 |
| Light | 4   | 0.0     | 0.0  | 0.0  | 99.1 | 0.5  | 0.0  | 0.4  | 0.0  | 0.0  | 0.0  | 0.0 | 0.0  | 0.0  | 0.0  | 0.0 |
| Light | 5   | 0.0     | 0.0  | 0.0  | 0.0  | 0.2  | 0.0  | 0.0  | 2.7  | 19.4 | 44.9 | 5.1 | 23.9 | 3.3  | 0.4  | 0.0 |
| Light | 6   | 0.0     | 3.5  | 52.7 | 14.7 | 16.6 | 5.2  | 4.1  | 1.2  | 0.2  | 0.0  | 1.8 | 0.0  | 0.0  | 0.0  | 0.0 |
| Light | 7   | 0.0     | 5.6  | 79.8 | 10.9 | 0.0  | 2.5  | 0.0  | 0.0  | 0.0  | 0.0  | 1.2 | 0.0  | 0.0  | 0.0  | 0.0 |
| Light | 8   | 0.0     | 0.0  | 0.0  | 0.0  | 0.1  | 0.0  | 41.5 | 56.5 | 2.0  | 0.0  | 0.0 | 0.0  | 0.0  | 0.0  | 0.0 |
| Light | 9   | 0.0     | 0.0  | 0.0  | 0.1  | 0.0  | 0.0  | 90.3 | 4.2  | 4.7  | 0.7  | 0.0 | 0.0  | 0.0  | 0.0  | 0.0 |
| Light | 10  | 0.0     | 0.0  | 0.0  | 0.0  | 12.2 | 0.0  | 3.3  | 45.9 | 38.6 | 0.0  | 0.0 | 0.0  | 0.0  | 0.0  | 0.0 |
| Light | 11  | 0.0     | 7.3  | 55.8 | 0.0  | 0.0  | 35.0 | 0.0  | 0.0  | 0.0  | 0.0  | 1.9 | 0.0  | 0.0  | 0.0  | 0.0 |
| Light | 12  | 0.0     | 2.7  | 29.8 | 55.2 | 1.7  | 0.0  | 6.3  | 3.7  | 0.7  | 0.0  | 0.0 | 0.0  | 0.0  | 0.0  | 0.0 |
| Light | 13  | 0.0     | 0.0  | 2.9  | 6.2  | 17.3 | 0.1  | 29.9 | 4.0  | 14.0 | 4.0  | 5.7 | 1.6  | 1.1  | 3.8  | 9.5 |
| Light | 14  | 0.0     | 0.0  | 0.5  | 94.8 | 0.1  | 0.0  | 4.4  | 0.2  | 0.0  | 0.0  | 0.0 | 0.0  | 0.0  | 0.0  | 0.0 |
| Light | 15  | 0.0     | 0.0  | 4.4  | 65.7 | 9.1  | 0.0  | 15.6 | 3.4  | 0.0  | 0.0  | 1.8 | 0.0  | 0.0  | 0.0  | 0.0 |
| Light | 16  | 0.0     | 0.3  | 24.9 | 4.8  | 4.3  | 3.9  | 22.2 | 31.5 | 8.0  | 0.0  | 0.0 | 0.0  | 0.0  | 0.0  | 0.0 |
| Light | 17  | 0.0     | 19.1 | 46.1 | 11.9 | 2.2  | 2.1  | 9.4  | 5.1  | 1.6  | 0.3  | 2.2 | 0.0  | 0.0  | 0.0  | 0.0 |
| Light | 18  | 0.0     | 0.0  | 0.0  | 0.1  | 2.2  | 0.0  | 9.3  | 9.0  | 38.5 | 28.2 | 0.0 | 12.7 | 0.0  | 0.0  | 0.0 |
| Light | 19  | 0.0     | 18.3 | 45.2 | 6.8  | 2.2  | 5.3  | 19.6 | 0.5  | 0.1  | 0.0  | 1.7 | 0.3  | 0.0  | 0.0  | 0.0 |
| Light | 20  | 0.0     | 0.0  | 0.1  | 6.8  | 11.9 | 0.0  | 53.0 | 17.3 | 9.5  | 1.5  | 0.0 | 0.0  | 0.0  | 0.0  | 0.0 |
| Light | 21  | 0.0     | 0.0  | 0.0  | 3.8  | 3.4  | 0.0  | 14.0 | 36.9 | 21.9 | 18.0 | 0.0 | 0.0  | 2.0  | 0.0  | 0.0 |
| Light | 22  | 0.0     | 6.5  | 46.1 | 35.1 | 2.7  | 8.1  | 0.7  | 0.2  | 0.0  | 0.0  | 0.5 | 0.0  | 0.0  | 0.0  | 0.0 |
| Light | 23  | 0.0     | 0.0  | 0.0  | 0.0  | 0.2  | 0.0  | 59.3 | 9.7  | 12.8 | 12.5 | 0.0 | 0.3  | 4.9  | 0.3  | 0.0 |
| Light | 24  | 0.0     | 0.0  | 0.0  | 0.0  | 0.0  | 0.0  | 4.0  | 18.7 | 16.4 | 29.0 | 0.0 | 3.3  | 11.3 | 11.3 | 6.0 |
| Light | 25  | 0.0     | 6.1  | 23.9 | 26.3 | 11.0 | 22.1 | 1.4  | 3.3  | 5.2  | 0.0  | 0.7 | 0.0  | 0.0  | 0.0  | 0.0 |
| Light | 26  | 0.0     | 0.0  | 0.0  | 0.0  | 0.0  | 0.0  | 81.5 | 17.4 | 1.0  | 0.1  | 0.0 | 0.0  | 0.0  | 0.0  | 0.0 |
| Light | 27  | 0.0     | 3.6  | 15.4 | 4.8  | 1.6  | 72.7 | 0.1  | 0.0  | 0.1  | 0.0  | 1.6 | 0.0  | 0.0  | 0.0  | 0.0 |
| Light | 28  | 0.0     | 60.3 | 22.2 | 3.7  | 0.0  | 0.1  | 11.2 | 2.6  | 0.0  | 0.0  | 0.0 | 0.0  | 0.0  | 0.0  | 0.0 |
| Light | 29  | 0.0     | 0.0  | 6.0  | 67.3 | 12.2 | 0.0  | 11.2 | 3.3  | 0.0  | 0.0  | 0.0 | 0.0  | 0.0  | 0.0  | 0.0 |
| Light | 30  | 0.0     | 2.8  | 36.6 | 1.1  | 0.2  | 1.0  | 46.1 | 10.8 | 1.2  | 0.0  | 0.0 | 0.0  | 0.0  | 0.0  | 0.0 |
| Light | 31  | 0.0     | 0.0  | 0.0  | 4.0  | 18.4 | 0.0  | 6.4  | 33.9 | 36.4 | 0.7  | 0.1 | 0.0  | 0.0  | 0.0  | 0.0 |
| Light | 32  | 0.0     | 0.0  | 0.0  | 0.0  | 41.4 | 0.0  | 3.7  | 7.8  | 40.3 | 5.5  | 0.0 | 0.6  | 0.8  | 0.0  | 0.0 |
| Light | 33  | 0.0     | 0.0  | 0.0  | 0.0  | 1.9  | 0.0  | 15.1 | 21.9 | 40.0 | 18.8 | 0.0 | 0.0  | 2.2  | 0.0  | 0.0 |
| Light | 34  | 0.0     | 0.0  | 0.0  | 0.0  | 0.2  | 0.0  | 42.5 | 56.5 | 0.8  | 0.0  | 0.0 | 0.0  | 0.0  | 0.0  | 0.0 |
| Light | 35  | 0.0     | 0.0  | 4.7  | 11.8 | 0.6  | 0.0  | 4.8  | 7.3  | 22.3 | 43.9 | 0.0 | 0.0  | 4.6  | 0.0  | 0.0 |
| Light | 36  | 0.0     | 0.0  | 3.7  | 3.5  | 0.6  | 0.1  | 85.0 | 6.5  | 0.0  | 0.0  | 0.5 | 0.0  | 0.0  | 0.0  | 0.0 |
| Light | 37  | 0.0     | 0.0  | 0.0  | 74.3 | 8.7  | 0.0  | 15.9 | 1.0  | 0.0  | 0.0  | 0.0 | 0.0  | 0.0  | 0.0  | 0.0 |
| Light | 38  | 0.0     | 0.0  | 0.8  | 15.1 | 5.8  | 0.0  | 36.4 | 40.0 | 1.9  | 0.0  | 0.0 | 0.0  | 0.0  | 0.0  | 0.0 |
| Light | 39  | 0.0     | 0.0  | 0.0  | 24.8 | 32.5 | 0.0  | 13.2 | 18.9 | 9.1  | 1.2  | 0.0 | 0.0  | 0.2  | 0.0  | 0.0 |
| Light | 40  | 0.0     | 0.0  | 0.0  | 2.8  | 36.4 | 0.0  | 45.3 | 3.4  | 5.8  | 0.0  | 6.1 | 0.1  | 0.0  | 0.0  | 0.0 |
| Light | 41  | 0.0     | 0.4  | 30.2 | 1.2  | 0.0  | 65.9 | 0.0  | 0.0  | 0.0  | 0.0  | 2.4 | 0.0  | 0.0  | 0.0  | 0.0 |
| Light | 42  | 0.0     | 0.0  | 0.7  | 37.1 | 5.5  | 0.0  | 51.9 | 4.9  | 0.0  | 0.0  | 0.0 | 0.0  | 0.0  | 0.0  | 0.0 |

Table S3: Distributions (%) of the unperturbed and RRS simulations of VVD Dark and Light states among 15 clusters.

| Type  | Res | Cluster |      |      |      |      |      |      |      |      |      |      |      |      |     |     |
|-------|-----|---------|------|------|------|------|------|------|------|------|------|------|------|------|-----|-----|
|       |     | 1       | 2    | 3    | 4    | 5    | 6    | 7    | 8    | 9    | 10   | 11   | 12   | 13   | 14  | 15  |
| Light | 43  | 0.0     | 0.0  | 0.0  | 46.1 | 9.1  | 0.0  | 34.5 | 10.0 | 0.3  | 0.0  | 0.0  | 0.0  | 0.0  | 0.0 | 0.0 |
| Light | 44  | 0.0     | 0.0  | 0.2  | 77.7 | 0.1  | 0.0  | 20.9 | 1.2  | 0.0  | 0.0  | 0.0  | 0.0  | 0.0  | 0.0 | 0.0 |
| Light | 45  | 0.0     | 6.8  | 19.1 | 2.8  | 0.2  | 0.0  | 26.3 | 44.2 | 0.7  | 0.0  | 0.0  | 0.0  | 0.0  | 0.0 | 0.0 |
| Light | 46  | 0.0     | 1.9  | 55.1 | 7.4  | 1.7  | 7.6  | 3.7  | 8.0  | 5.5  | 1.8  | 1.5  | 4.0  | 1.4  | 0.4 | 0.0 |
| Light | 47  | 0.0     | 0.0  | 0.0  | 0.0  | 0.0  | 0.0  | 0.0  | 0.0  | 0.1  | 0.9  | 0.0  | 72.3 | 26.4 | 0.3 | 0.0 |
| Light | 48  | 0.0     | 0.0  | 0.0  | 0.2  | 9.7  | 0.0  | 8.6  | 23.0 | 53.1 | 5.0  | 0.0  | 0.4  | 0.0  | 0.0 | 0.0 |
| Light | 49  | 0.0     | 0.0  | 1.6  | 10.1 | 18.1 | 0.0  | 12.5 | 6.7  | 23.8 | 2.0  | 20.7 | 4.6  | 0.0  | 0.0 | 0.0 |
| Light | 50  | 0.3     | 1.1  | 27.1 | 6.3  | 2.5  | 35.2 | 6.8  | 18.5 | 1.9  | 0.0  | 0.3  | 0.0  | 0.0  | 0.0 | 0.0 |
| Light | 51  | 0.0     | 6.7  | 24.8 | 14.8 | 13.9 | 1.2  | 23.0 | 5.3  | 2.7  | 0.1  | 5.0  | 2.6  | 0.0  | 0.1 | 0.0 |
| Light | 52  | 0.0     | 31.4 | 33.9 | 2.9  | 0.0  | 30.6 | 0.0  | 0.0  | 0.0  | 0.0  | 1.2  | 0.0  | 0.0  | 0.0 | 0.0 |
| Light | 53  | 0.0     | 26.6 | 49.6 | 19.9 | 2.2  | 0.2  | 1.3  | 0.3  | 0.0  | 0.0  | 0.0  | 0.0  | 0.0  | 0.0 | 0.0 |
| Light | 54  | 0.7     | 49.4 | 7.8  | 17.4 | 1.6  | 0.4  | 16.8 | 1.2  | 0.0  | 0.0  | 3.8  | 0.8  | 0.0  | 0.0 | 0.0 |
| Light | 55  | 0.0     | 0.3  | 58.7 | 20.7 | 0.2  | 1.4  | 17.9 | 0.7  | 0.0  | 0.0  | 0.0  | 0.0  | 0.0  | 0.0 | 0.0 |
| Light | 56  | 0.0     | 52.9 | 25.3 | 5.9  | 1.4  | 0.1  | 11.6 | 2.7  | 0.0  | 0.0  | 0.1  | 0.0  | 0.0  | 0.0 | 0.0 |
| Light | 57  | 0.0     | 0.0  | 0.0  | 2.6  | 1.4  | 0.0  | 67.0 | 14.3 | 5.1  | 8.3  | 0.0  | 0.0  | 1.3  | 0.0 | 0.0 |
| Light | 58  | 0.0     | 0.0  | 0.0  | 10.8 | 1.9  | 0.0  | 58.6 | 15.3 | 7.6  | 5.8  | 0.0  | 0.0  | 0.0  | 0.0 | 0.0 |
| Light | 59  | 0.0     | 0.0  | 3.4  | 80.4 | 9.4  | 0.0  | 5.0  | 0.3  | 0.2  | 0.0  | 1.4  | 0.0  | 0.0  | 0.0 | 0.0 |
| Light | 60  | 0.0     | 0.0  | 0.0  | 33.8 | 40.5 | 0.0  | 9.0  | 12.0 | 4.6  | 0.0  | 0.0  | 0.0  | 0.0  | 0.0 | 0.0 |
| Light | 61  | 0.0     | 0.9  | 14.3 | 3.0  | 2.1  | 33.2 | 39.0 | 4.2  | 0.2  | 0.0  | 3.1  | 0.0  | 0.0  | 0.0 | 0.0 |
| Light | 62  | 0.0     | 0.1  | 7.5  | 15.0 | 16.9 | 3.1  | 1.0  | 5.8  | 16.5 | 20.7 | 9.0  | 1.2  | 3.1  | 0.1 | 0.0 |
| Light | 63  | 0.0     | 12.5 | 79.7 | 7.7  | 0.0  | 0.0  | 0.1  | 0.0  | 0.0  | 0.0  | 0.0  | 0.0  | 0.0  | 0.0 | 0.0 |
| Light | 64  | 0.0     | 0.0  | 0.0  | 6.3  | 7.8  | 0.0  | 54.0 | 9.2  | 22.0 | 0.8  | 0.0  | 0.0  | 0.1  | 0.0 | 0.0 |
| Light | 65  | 0.0     | 0.0  | 0.0  | 2.0  | 72.7 | 0.0  | 0.0  | 2.4  | 22.7 | 0.1  | 0.0  | 0.1  | 0.0  | 0.0 | 0.0 |
| Light | 66  | 0.0     | 0.0  | 0.0  | 9.8  | 75.4 | 0.0  | 2.2  | 0.6  | 8.9  | 0.0  | 3.2  | 0.0  | 0.0  | 0.0 | 0.0 |
| Light | 67  | 0.0     | 3.2  | 28.2 | 15.8 | 1.7  | 50.6 | 0.5  | 0.0  | 0.0  | 0.0  | 0.0  | 0.0  | 0.0  | 0.0 | 0.0 |
| Light | 68  | 0.0     | 0.0  | 0.0  | 14.8 | 29.8 | 0.0  | 35.0 | 17.4 | 0.7  | 0.0  | 2.4  | 0.0  | 0.0  | 0.0 | 0.0 |
| Light | 69  | 0.0     | 0.0  | 0.0  | 0.0  | 5.7  | 0.0  | 47.4 | 45.8 | 1.2  | 0.0  | 0.0  | 0.0  | 0.0  | 0.0 | 0.0 |
| Light | 70  | 0.0     | 0.0  | 0.0  | 0.0  | 55.6 | 0.0  | 0.5  | 12.5 | 30.4 | 1.0  | 0.0  | 0.0  | 0.0  | 0.0 | 0.0 |
| Light | 71  | 0.7     | 26.9 | 13.3 | 48.0 | 0.1  | 0.1  | 10.9 | 0.1  | 0.0  | 0.0  | 0.0  | 0.0  | 0.0  | 0.0 | 0.0 |
| Light | 72  | 0.0     | 0.7  | 5.4  | 3.5  | 2.0  | 1.3  | 64.5 | 21.9 | 0.7  | 0.0  | 0.0  | 0.0  | 0.0  | 0.0 | 0.0 |
| Light | 73  | 0.0     | 0.0  | 0.0  | 0.0  | 6.4  | 0.0  | 0.0  | 20.6 | 67.3 | 5.6  | 0.0  | 0.1  | 0.0  | 0.0 | 0.0 |
| Light | 74  | 0.0     | 0.0  | 0.0  | 0.0  | 0.4  | 0.0  | 0.0  | 9.9  | 73.3 | 12.6 | 0.0  | 1.0  | 2.9  | 0.0 | 0.0 |
| Light | 75  | 0.0     | 13.2 | 16.6 | 22.4 | 18.2 | 11.2 | 3.3  | 8.4  | 4.3  | 1.2  | 0.7  | 0.0  | 0.6  | 0.0 | 0.0 |
| Light | 76  | 0.0     | 31.9 | 55.6 | 5.1  | 0.0  | 0.1  | 2.8  | 4.4  | 0.2  | 0.0  | 0.0  | 0.0  | 0.0  | 0.0 | 0.0 |
| Light | 77  | 0.0     | 0.0  | 0.0  | 0.1  | 0.3  | 0.0  | 40.4 | 25.1 | 27.1 | 7.0  | 0.0  | 0.0  | 0.0  | 0.0 | 0.0 |
| Light | 78  | 0.0     | 0.0  | 0.0  | 6.7  | 28.0 | 0.0  | 34.1 | 29.8 | 1.2  | 0.0  | 0.2  | 0.0  | 0.0  | 0.0 | 0.0 |
| Light | 79  | 0.0     | 13.8 | 22.5 | 8.3  | 2.3  | 43.2 | 8.6  | 0.7  | 0.0  | 0.0  | 0.7  | 0.0  | 0.0  | 0.0 | 0.0 |
| Light | 80  | 0.0     | 0.0  | 0.3  | 79.7 | 4.5  | 0.0  | 12.2 | 3.2  | 0.1  | 0.0  | 0.0  | 0.0  | 0.0  | 0.0 | 0.0 |
| Light | 81  | 0.8     | 8.6  | 16.6 | 21.2 | 6.8  | 27.6 | 11.6 | 5.4  | 0.6  | 0.0  | 0.8  | 0.0  | 0.0  | 0.0 | 0.0 |
| Light | 82  | 0.0     | 6.3  | 19.3 | 0.8  | 1.9  | 26.7 | 18.4 | 1.5  | 1.7  | 4.0  | 3.9  | 0.0  | 13.8 | 1.8 | 0.0 |
| Light | 83  | 0.0     | 0.0  | 0.1  | 6.1  | 5.4  | 0.0  | 63.3 | 21.0 | 3.4  | 0.7  | 0.1  | 0.0  | 0.0  | 0.0 | 0.0 |
| Light | 84  | 0.0     | 0.0  | 0.0  | 3.3  | 2.2  | 0.0  | 61.8 | 11.8 | 4.9  | 1.9  | 0.0  | 9.2  | 4.9  | 0.0 | 0.0 |
| Light | 85  | 0.0     | 3.6  | 11.5 | 64.3 | 19.3 | 0.0  | 1.2  | 0.0  | 0.0  | 0.0  | 0.1  | 0.0  | 0.0  | 0.0 | 0.0 |
| Light | 86  | 0.0     | 1.2  | 18.7 | 30.4 | 11.8 | 0.3  | 0.8  | 2.1  | 16.2 | 1.7  | 10.2 | 6.6  | 0.0  | 0.0 | 0.0 |
| Light | 87  | 0.0     | 0.0  | 0.0  | 0.4  | 43.6 | 0.0  | 8.9  | 19.2 | 26.0 | 1.4  | 0.0  | 0.5  | 0.0  | 0.0 | 0.0 |
| Light | 88  | 0.0     | 0.0  | 0.0  | 0.1  | 0.2  | 0.0  | 88.7 | 11.1 | 0.0  | 0.0  | 0.0  | 0.0  | 0.0  | 0.0 | 0.0 |
| Light | 89  | 0.0     | 0.0  | 0.0  | 0.0  | 0.0  | 0.0  | 93.9 | 6.1  | 0.0  | 0.0  | 0.0  | 0.0  | 0.0  | 0.0 | 0.0 |
| Light | 90  | 0.0     | 24.3 | 27.7 | 10.3 | 1.6  | 0.0  | 17.7 | 17.5 | 1.0  | 0.0  | 0.0  | 0.0  | 0.0  | 0.0 | 0.0 |

Table S3: Distributions (%) of the unperturbed and RRS simulations of VVD Dark and Light states among 15 clusters.

| Type  | Res | Cluster |      |      |      |      |      |      |      |      |      |      |      |      |      |      |
|-------|-----|---------|------|------|------|------|------|------|------|------|------|------|------|------|------|------|
|       |     | 1       | 2    | 3    | 4    | 5    | 6    | 7    | 8    | 9    | 10   | 11   | 12   | 13   | 14   | 15   |
| Light | 91  | 0.0     | 0.0  | 0.4  | 81.3 | 4.9  | 0.0  | 10.8 | 2.0  | 0.4  | 0.0  | 0.1  | 0.0  | 0.0  | 0.0  | 0.0  |
| Light | 92  | 0.0     | 0.0  | 0.1  | 19.0 | 8.0  | 0.0  | 59.6 | 12.8 | 0.4  | 0.0  | 0.1  | 0.0  | 0.0  | 0.0  | 0.0  |
| Light | 93  | 0.0     | 0.0  | 0.0  | 0.1  | 13.9 | 0.0  | 12.0 | 61.7 | 12.2 | 0.1  | 0.0  | 0.0  | 0.0  | 0.0  | 0.0  |
| Light | 94  | 0.0     | 0.0  | 0.0  | 27.9 | 18.0 | 0.0  | 47.4 | 6.2  | 0.4  | 0.0  | 0.0  | 0.0  | 0.0  | 0.0  | 0.0  |
| Light | 95  | 0.0     | 21.5 | 41.3 | 16.1 | 15.2 | 1.7  | 0.9  | 0.2  | 0.2  | 0.0  | 3.0  | 0.0  | 0.0  | 0.0  | 0.0  |
| Light | 96  | 0.0     | 0.0  | 6.6  | 19.5 | 15.8 | 0.0  | 6.1  | 26.5 | 16.2 | 7.6  | 0.1  | 0.8  | 0.9  | 0.0  | 0.0  |
| Light | 97  | 0.0     | 0.0  | 0.0  | 0.2  | 2.9  | 0.0  | 76.9 | 17.4 | 2.6  | 0.1  | 0.0  | 0.0  | 0.0  | 0.0  | 0.0  |
| Light | 98  | 0.0     | 3.0  | 51.7 | 14.2 | 2.7  | 0.1  | 16.7 | 10.8 | 0.2  | 0.0  | 0.5  | 0.0  | 0.0  | 0.0  | 0.0  |
| Light | 99  | 0.0     | 0.4  | 5.0  | 2.2  | 1.9  | 0.4  | 0.4  | 3.2  | 3.8  | 0.3  | 81.3 | 1.1  | 0.0  | 0.0  | 0.0  |
| Light | 100 | 0.0     | 0.0  | 2.0  | 9.2  | 8.6  | 0.0  | 27.4 | 1.9  | 44.3 | 6.5  | 0.0  | 0.1  | 0.0  | 0.0  | 0.0  |
| Light | 101 | 0.0     | 0.0  | 0.0  | 0.1  | 0.1  | 0.0  | 89.2 | 10.6 | 0.0  | 0.0  | 0.0  | 0.0  | 0.0  | 0.0  | 0.0  |
| Light | 102 | 0.1     | 5.8  | 29.9 | 16.9 | 9.1  | 0.6  | 9.6  | 18.1 | 9.5  | 0.5  | 0.0  | 0.0  | 0.0  | 0.0  | 0.0  |
| Light | 103 | 0.0     | 0.0  | 0.0  | 4.7  | 2.6  | 0.0  | 84.5 | 8.0  | 0.1  | 0.0  | 0.0  | 0.0  | 0.0  | 0.0  | 0.0  |
| Light | 104 | 0.0     | 0.0  | 0.0  | 3.3  | 0.5  | 0.0  | 92.5 | 3.4  | 0.3  | 0.0  | 0.0  | 0.0  | 0.0  | 0.0  | 0.0  |
| Light | 105 | 0.0     | 0.0  | 0.0  | 9.5  | 1.9  | 0.0  | 41.3 | 46.4 | 0.9  | 0.0  | 0.0  | 0.0  | 0.0  | 0.0  | 0.0  |
| Light | 106 | 0.0     | 0.0  | 0.0  | 0.2  | 0.2  | 0.0  | 91.3 | 7.9  | 0.3  | 0.0  | 0.0  | 0.0  | 0.0  | 0.0  | 0.0  |
| Light | 107 | 0.0     | 0.0  | 0.0  | 88.6 | 4.6  | 0.0  | 6.4  | 0.3  | 0.0  | 0.0  | 0.0  | 0.0  | 0.0  | 0.0  | 0.0  |
| Light | 108 | 0.0     | 0.0  | 0.0  | 0.9  | 4.1  | 0.0  | 46.9 | 38.3 | 9.7  | 0.2  | 0.0  | 0.0  | 0.0  | 0.0  | 0.0  |
| Light | 109 | 0.0     | 0.1  | 8.9  | 14.0 | 9.5  | 0.0  | 2.2  | 27.6 | 36.5 | 1.0  | 0.2  | 0.0  | 0.0  | 0.0  | 0.0  |
| Light | 110 | 0.0     | 0.0  | 0.0  | 3.1  | 9.9  | 0.0  | 8.7  | 12.1 | 56.9 | 9.0  | 0.0  | 0.0  | 0.3  | 0.0  | 0.0  |
| Light | 111 | 0.0     | 0.0  | 0.0  | 11.2 | 25.6 | 0.0  | 48.3 | 5.8  | 3.0  | 0.0  | 5.8  | 0.1  | 0.0  | 0.0  | 0.0  |
| Light | 112 | 0.0     | 5.4  | 55.4 | 35.1 | 1.5  | 0.0  | 0.9  | 0.2  | 0.0  | 0.0  | 1.5  | 0.0  | 0.0  | 0.0  | 0.0  |
| Light | 113 | 0.0     | 0.0  | 0.0  | 0.2  | 1.4  | 0.0  | 36.7 | 60.9 | 0.9  | 0.0  | 0.0  | 0.0  | 0.0  | 0.0  | 0.0  |
| Light | 114 | 0.0     | 0.0  | 1.4  | 20.3 | 3.5  | 0.0  | 41.8 | 31.7 | 1.3  | 0.0  | 0.0  | 0.0  | 0.0  | 0.0  | 0.0  |
| Light | 115 | 0.0     | 0.0  | 0.2  | 9.5  | 11.2 | 0.0  | 7.7  | 7.7  | 29.0 | 26.2 | 1.3  | 2.1  | 4.6  | 0.5  | 0.0  |
| Light | 116 | 0.0     | 2.9  | 18.1 | 12.6 | 11.2 | 18.2 | 19.2 | 0.7  | 3.7  | 0.3  | 11.9 | 1.0  | 0.0  | 0.0  | 0.0  |
| Light | 117 | 0.0     | 0.0  | 0.8  | 9.1  | 8.4  | 0.1  | 6.8  | 21.6 | 15.0 | 9.1  | 8.3  | 8.0  | 9.1  | 3.0  | 0.7  |
| Light | 118 | 0.0     | 0.1  | 17.7 | 1.1  | 14.7 | 6.2  | 1.0  | 10.6 | 34.7 | 4.5  | 9.3  | 0.1  | 0.0  | 0.0  | 0.0  |
| Light | 119 | 25.1    | 67.0 | 5.7  | 0.2  | 0.0  | 1.0  | 0.0  | 0.0  | 0.0  | 0.0  | 1.1  | 0.0  | 0.0  | 0.0  | 0.0  |
| Light | 120 | 0.0     | 0.0  | 0.0  | 63.0 | 26.3 | 0.0  | 7.1  | 1.9  | 0.1  | 0.0  | 1.7  | 0.0  | 0.0  | 0.0  | 0.0  |
| Light | 121 | 0.0     | 0.0  | 0.7  | 0.4  | 1.4  | 0.0  | 0.0  | 0.6  | 2.4  | 7.3  | 26.5 | 38.8 | 14.5 | 7.0  | 0.5  |
| Light | 122 | 0.0     | 0.0  | 0.0  | 16.8 | 15.7 | 0.0  | 38.3 | 21.6 | 6.7  | 0.8  | 0.0  | 0.0  | 0.0  | 0.0  | 0.0  |
| Light | 123 | 0.0     | 0.0  | 0.0  | 0.0  | 0.0  | 0.0  | 57.0 | 42.0 | 0.8  | 0.2  | 0.0  | 0.0  | 0.0  | 0.0  | 0.0  |
| Light | 124 | 0.0     | 0.0  | 0.0  | 0.0  | 0.0  | 0.0  | 93.5 | 6.5  | 0.0  | 0.0  | 0.0  | 0.0  | 0.0  | 0.0  | 0.0  |
| Light | 125 | 0.0     | 0.0  | 0.0  | 0.3  | 0.6  | 0.0  | 87.8 | 11.2 | 0.0  | 0.0  | 0.0  | 0.0  | 0.0  | 0.0  | 0.0  |
| Light | 126 | 0.0     | 0.0  | 0.0  | 0.0  | 0.9  | 0.0  | 34.6 | 61.3 | 3.2  | 0.0  | 0.0  | 0.0  | 0.0  | 0.0  | 0.0  |
| Light | 127 | 0.0     | 0.0  | 0.4  | 10.1 | 7.0  | 0.0  | 67.2 | 14.2 | 0.8  | 0.3  | 0.0  | 0.0  | 0.0  | 0.0  | 0.0  |
| Light | 128 | 0.0     | 0.0  | 1.9  | 20.0 | 11.0 | 0.0  | 58.7 | 8.5  | 0.0  | 0.0  | 0.0  | 0.0  | 0.0  | 0.0  | 0.0  |
| Light | 129 | 0.0     | 4.1  | 29.7 | 22.1 | 0.0  | 17.7 | 26.4 | 0.0  | 0.0  | 0.0  | 0.0  | 0.0  | 0.0  | 0.0  | 0.0  |
| Light | 130 | 0.0     | 0.0  | 0.0  | 0.7  | 0.5  | 0.0  | 41.7 | 44.0 | 9.8  | 3.3  | 0.0  | 0.0  | 0.0  | 0.0  | 0.0  |
| Light | 131 | 0.0     | 19.8 | 75.3 | 4.7  | 0.0  | 0.2  | 0.0  | 0.0  | 0.0  | 0.0  | 0.0  | 0.0  | 0.0  | 0.0  | 0.0  |
| Light | 132 | 0.0     | 14.2 | 10.6 | 9.7  | 8.5  | 35.7 | 2.2  | 7.0  | 5.4  | 2.0  | 2.5  | 0.8  | 0.8  | 0.6  | 0.0  |
| Light | 133 | 0.0     | 0.0  | 0.2  | 66.8 | 3.9  | 0.0  | 25.4 | 3.6  | 0.0  | 0.0  | 0.0  | 0.0  | 0.0  | 0.0  | 0.0  |
| Light | 134 | 0.0     | 0.0  | 0.0  | 0.7  | 2.4  | 0.0  | 12.5 | 49.2 | 33.5 | 1.8  | 0.0  | 0.0  | 0.0  | 0.0  | 0.0  |
| Light | 135 | 0.0     | 0.0  | 0.0  | 14.0 | 1.7  | 0.0  | 34.0 | 2.4  | 1.6  | 5.0  | 0.0  | 0.0  | 1.6  | 21.4 | 18.2 |
| Light | 136 | 0.0     | 0.0  | 0.0  | 0.0  | 0.0  | 0.0  | 10.9 | 2.0  | 5.9  | 12.4 | 0.0  | 3.1  | 37.1 | 16.9 | 11.6 |
| Light | 137 | 0.0     | 0.0  | 0.1  | 56.6 | 35.7 | 0.0  | 2.3  | 0.0  | 0.1  | 0.0  | 5.2  | 0.0  | 0.0  | 0.0  | 0.0  |
| Light | 138 | 0.0     | 0.0  | 6.2  | 76.8 | 17.0 | 0.0  | 0.0  | 0.0  | 0.0  | 0.0  | 0.0  | 0.0  | 0.0  | 0.0  | 0.0  |

Table S3: Distributions (%) of the unperturbed and RRS simulations of VVD Dark and Light states among 15 clusters.

| Type  | Res | Cluster |      |      |      |      |     |      |      |      |      |     |      |     |     |     |
|-------|-----|---------|------|------|------|------|-----|------|------|------|------|-----|------|-----|-----|-----|
|       |     | 1       | 2    | 3    | 4    | 5    | 6   | 7    | 8    | 9    | 10   | 11  | 12   | 13  | 14  | 15  |
| Light | 139 | 0.0     | 0.0  | 0.1  | 26.7 | 11.0 | 0.0 | 51.7 | 8.6  | 1.9  | 0.0  | 0.0 | 0.0  | 0.0 | 0.0 | 0.0 |
| Light | 140 | 0.0     | 0.0  | 0.0  | 6.6  | 5.0  | 0.0 | 29.4 | 45.4 | 13.2 | 0.4  | 0.0 | 0.0  | 0.0 | 0.0 | 0.0 |
| Light | 141 | 0.0     | 10.9 | 49.5 | 14.8 | 3.1  | 1.4 | 7.5  | 9.9  | 2.3  | 0.0  | 0.6 | 0.0  | 0.0 | 0.0 | 0.0 |
| Light | 142 | 0.0     | 0.0  | 0.0  | 39.0 | 1.1  | 0.0 | 59.1 | 0.7  | 0.0  | 0.0  | 0.0 | 0.0  | 0.0 | 0.0 | 0.0 |
| Light | 143 | 0.0     | 0.0  | 0.0  | 9.3  | 0.4  | 0.0 | 80.7 | 8.4  | 1.1  | 0.0  | 0.0 | 0.0  | 0.0 | 0.0 | 0.0 |
| Light | 144 | 0.0     | 0.0  | 0.1  | 68.3 | 11.9 | 0.0 | 18.6 | 1.1  | 0.0  | 0.0  | 0.0 | 0.0  | 0.0 | 0.0 | 0.0 |
| Light | 145 | 0.0     | 0.0  | 0.0  | 11.6 | 5.8  | 0.0 | 14.6 | 2.8  | 19.4 | 15.2 | 3.0 | 26.1 | 1.6 | 0.0 | 0.0 |
| Light | 146 | 0.0     | 0.0  | 0.0  | 0.4  | 12.7 | 0.0 | 5.0  | 43.5 | 38.3 | 0.2  | 0.0 | 0.0  | 0.0 | 0.0 | 0.0 |
| Light | 147 | 0.0     | 52.4 | 45.9 | 0.3  | 0.0  | 1.3 | 0.0  | 0.0  | 0.0  | 0.0  | 0.0 | 0.0  | 0.0 | 0.0 | 0.0 |
| Light | 148 | 0.0     | 0.0  | 0.0  | 0.0  | 9.9  | 0.0 | 4.7  | 59.6 | 25.6 | 0.2  | 0.0 | 0.0  | 0.0 | 0.0 | 0.0 |

Table S4: Heat maps, histograms of  $C_{\alpha}$  cross-correlation matrices for all residues in VVD from RRS for both Dark and Light states. Each residue number represents a simulation in which that particular residue is subjected to rigid body constraints.

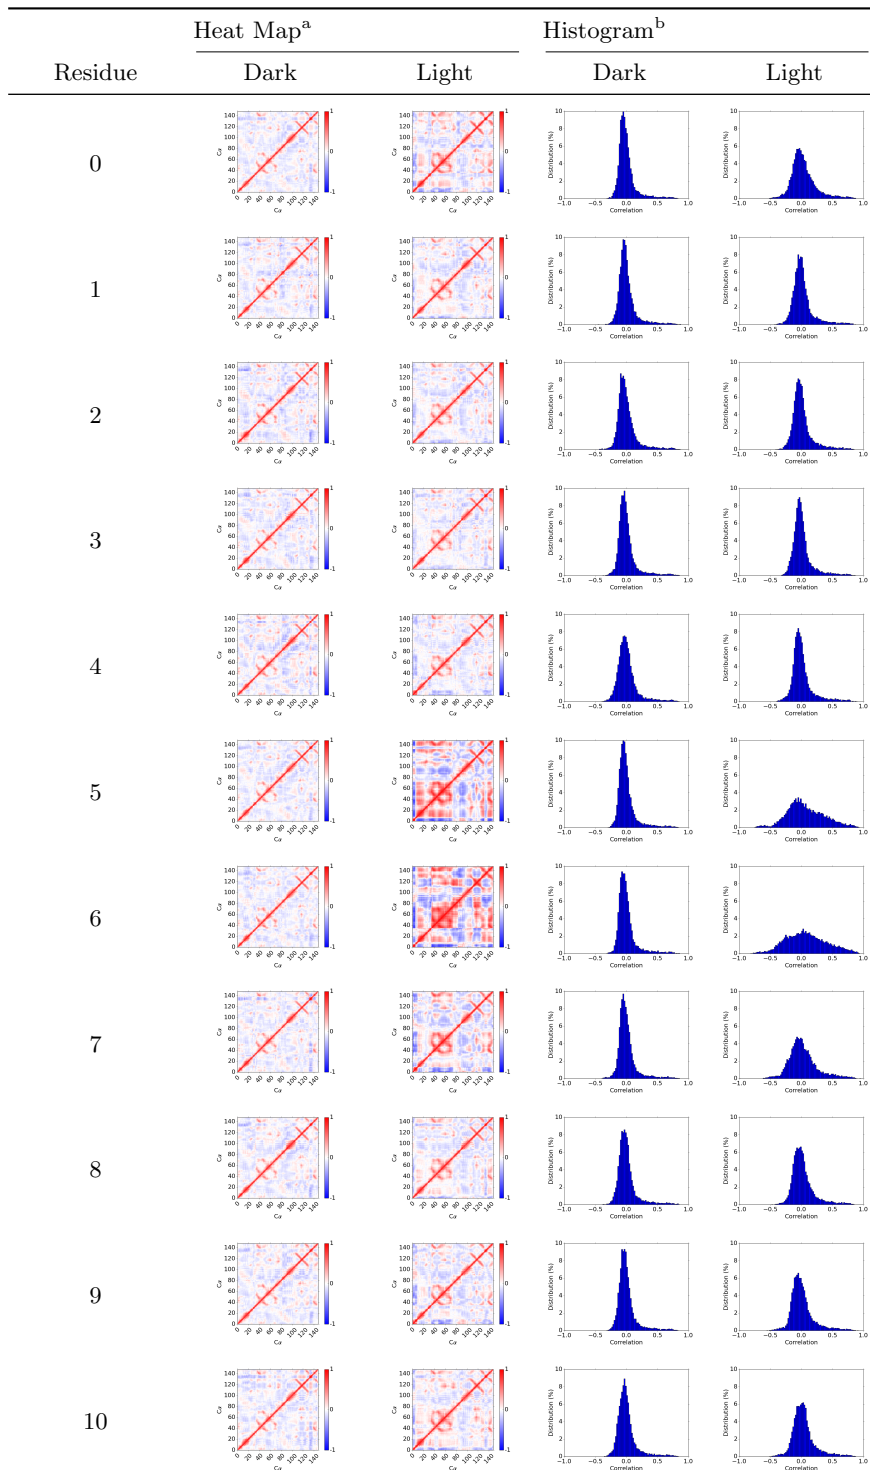

<sup>a</sup> In these heat maps, red means positive correlation, blue means negative correlation, white means no correlation.

<sup>b</sup> In the histogram plots, normalized distribution is plotted using 0.2 as bin width.

Table S4: Heat maps, histograms of  $C_{\alpha}$  cross-correlation matrices for all residues in VVD from RRS for both Dark and Light states. Each residue number represents a simulation in which that particular residue is subjected to rigid body constraints.

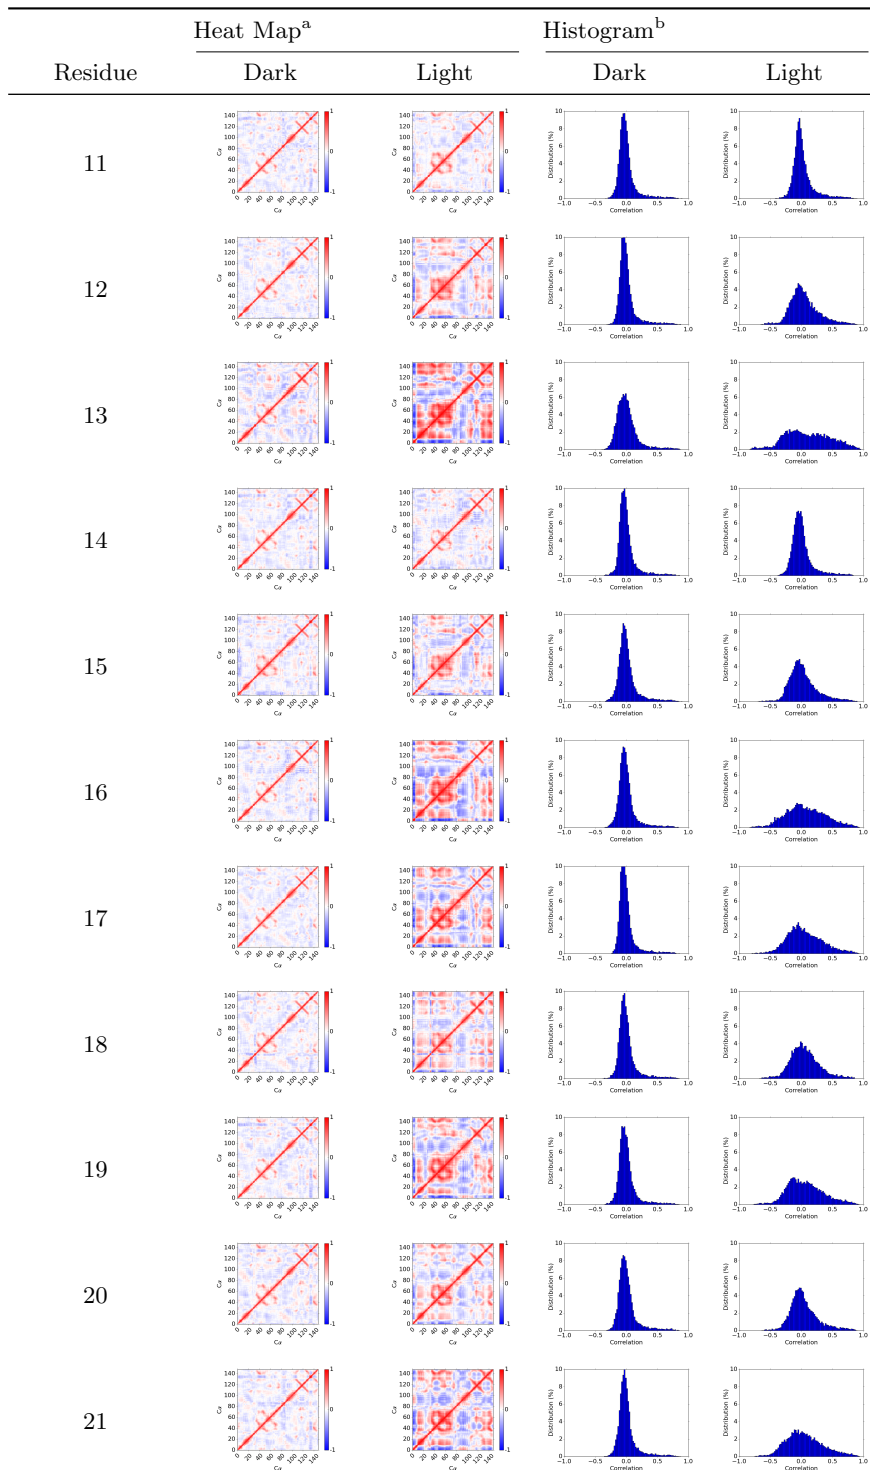

<sup>a</sup> In these heat maps, red means positive correlation, blue means negative correlation, white means no correlation.

<sup>b</sup> In the histogram plots, normalized distribution is plotted using 0.2 as bin width.

Table S4: Heat maps, histograms of  $C_{\alpha}$  cross-correlation matrices for all residues in VVD from RRS for both Dark and Light states. Each residue number represents a simulation in which that particular residue is subjected to rigid body constraints.

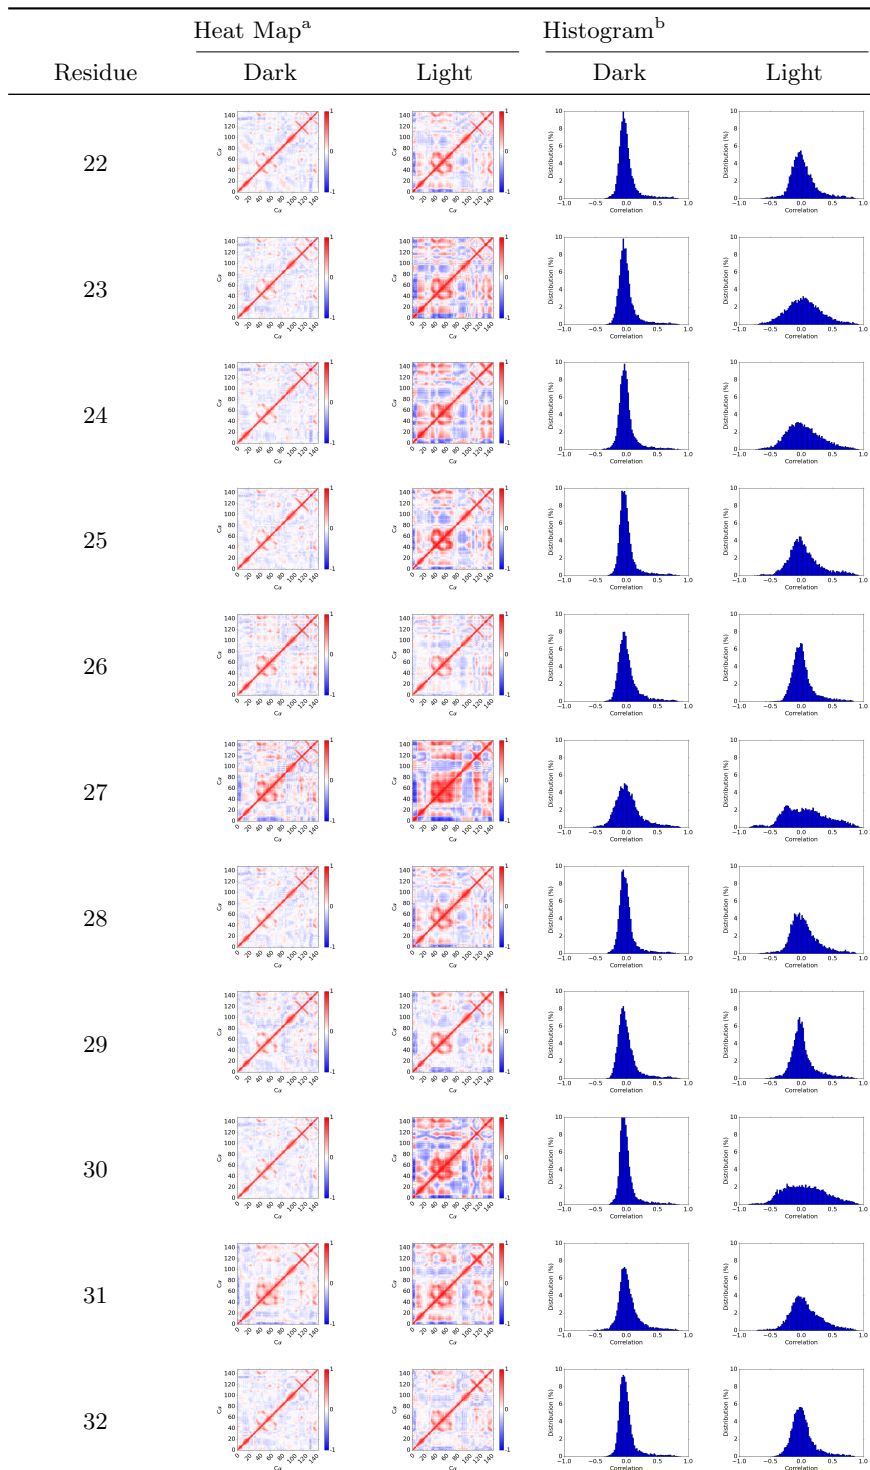

<sup>a</sup> In these heat maps, red means positive correlation, blue means negative correlation, white means no correlation.

<sup>b</sup> In the histogram plots, normalized distribution is plotted using 0.2 as bin width.

Table S4: Heat maps, histograms of  $C_{\alpha}$  cross-correlation matrices for all residues in VVD from RRS for both Dark and Light states. Each residue number represents a simulation in which that particular residue is subjected to rigid body constraints.

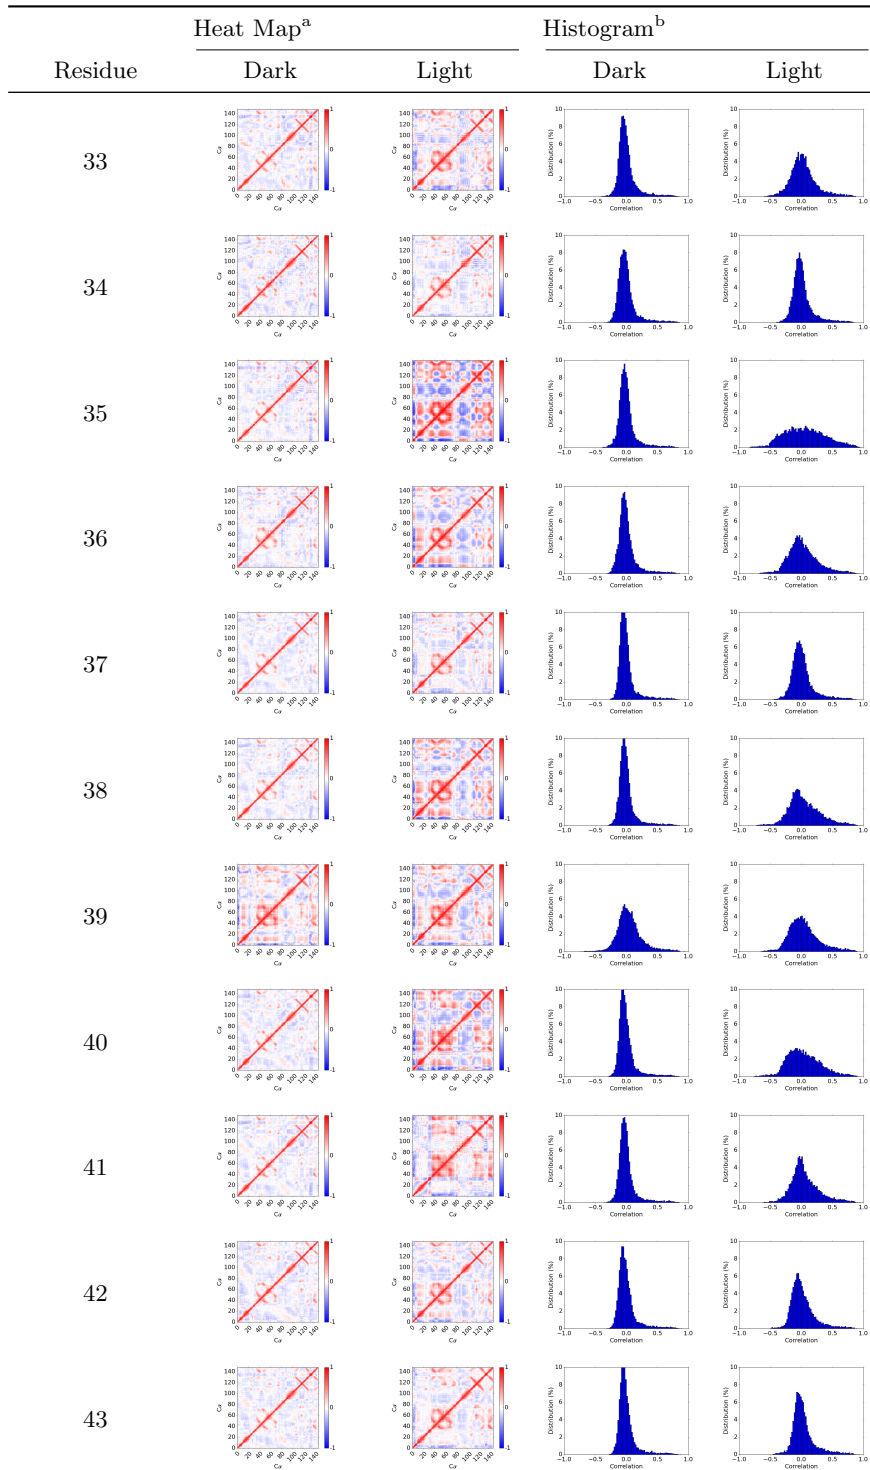

<sup>a</sup> In these heat maps, red means positive correlation, blue means negative correlation, white means no correlation.

<sup>b</sup> In the histogram plots, normalized distribution is plotted using 0.2 as bin width.



Table S4: Heat maps, histograms of  $C_{\alpha}$  cross-correlation matrices for all residues in VVD from RRS for both Dark and Light states. Each residue number represents a simulation in which that particular residue is subjected to rigid body constraints.

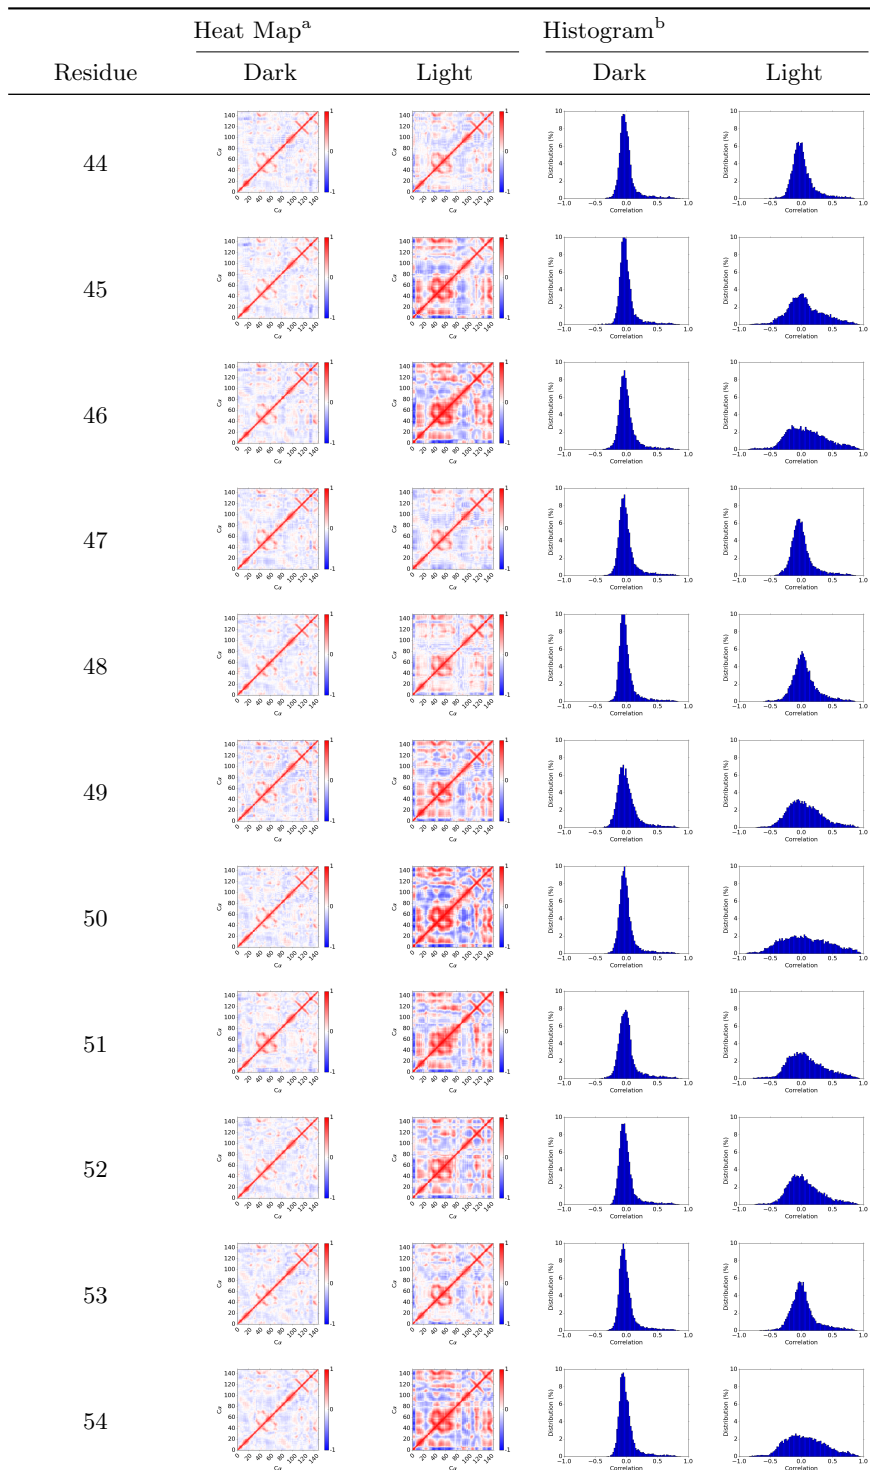

<sup>a</sup> In these heat maps, red means positive correlation, blue means negative correlation, white means no correlation.

<sup>b</sup> In the histogram plots, normalized distribution is plotted using 0.2 as bin width.

Table S4: Heat maps, histograms of  $C\alpha$  cross-correlation matrices for all residues in VVD from RRS for both Dark and Light states. Each residue number represents a simulation in which that particular residue is subjected to rigid body constraints.

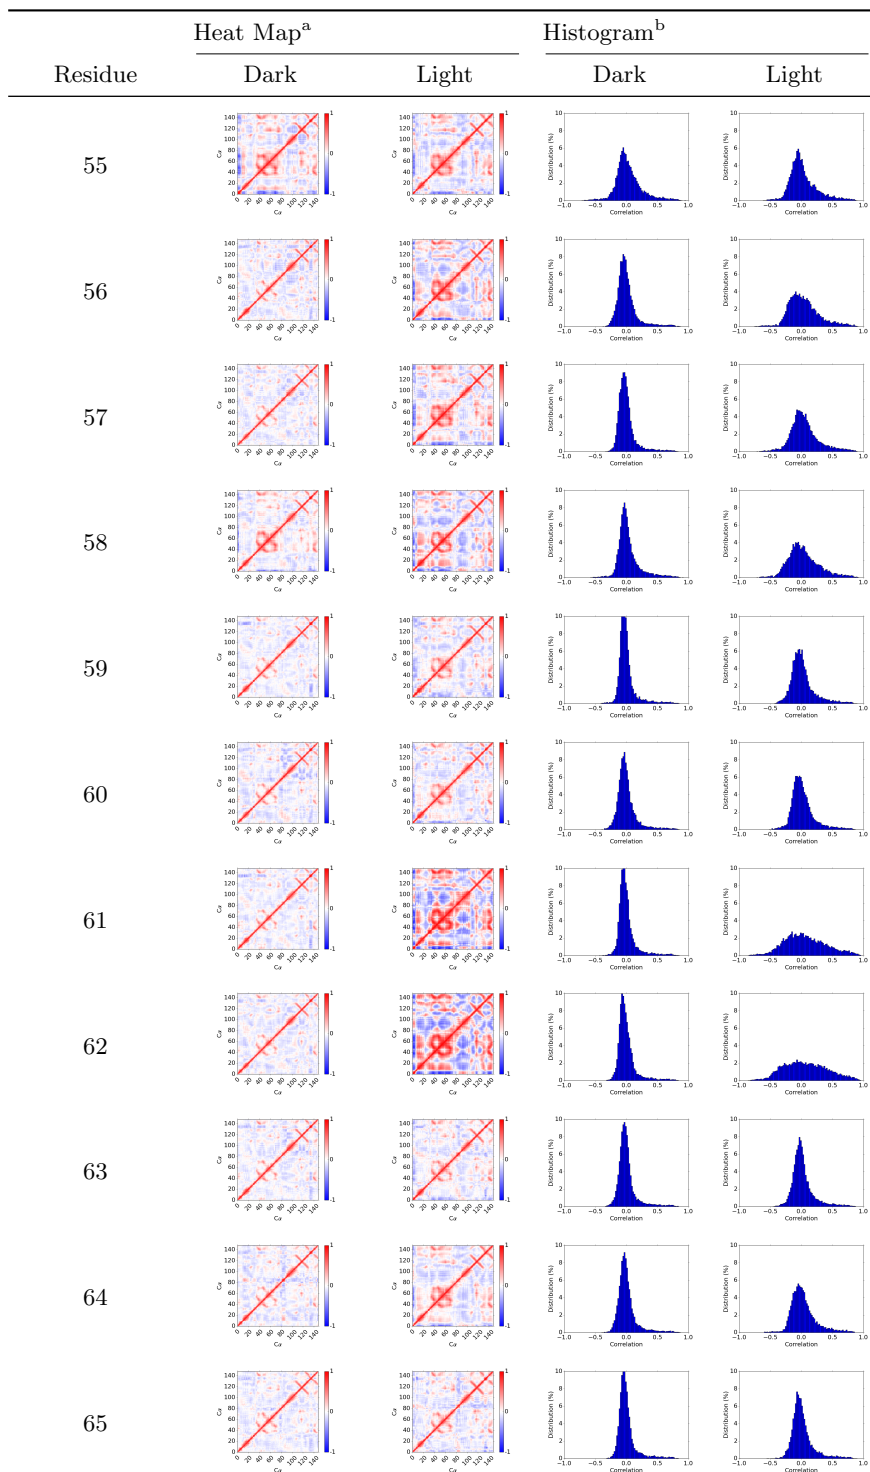

<sup>a</sup> In these heat maps, red means positive correlation, blue means negative correlation, white means no correlation.

<sup>b</sup> In the histogram plots, normalized distribution is plotted using 0.2 as bin width.

Table S4: Heat maps, histograms of  $C\alpha$  cross-correlation matrices for all residues in VVD from RRS for both Dark and Light states. Each residue number represents a simulation in which that particular residue is subjected to rigid body constraints.

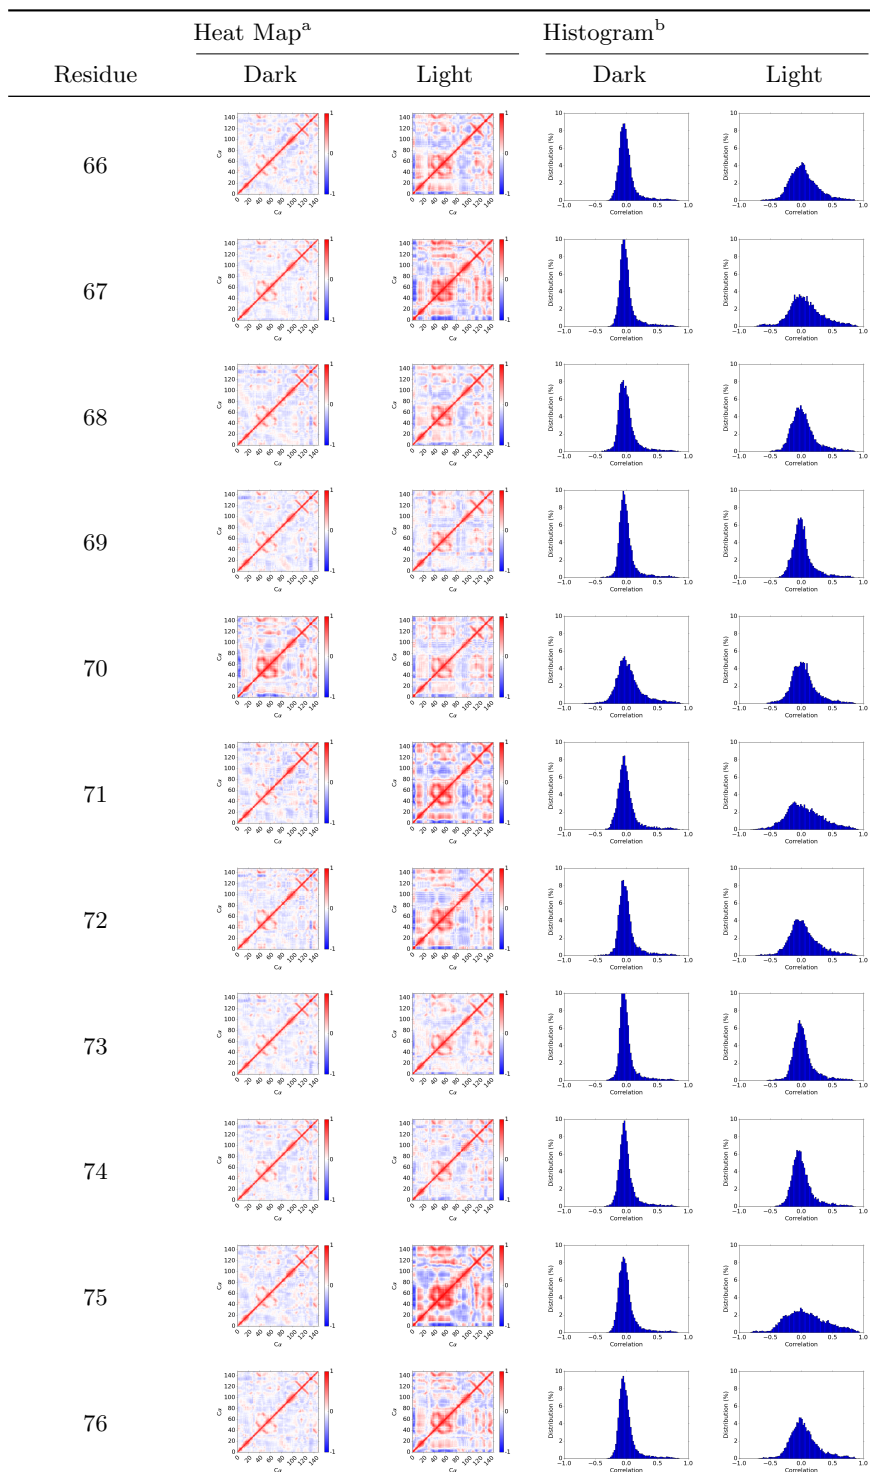

<sup>a</sup> In these heat maps, red means positive correlation, blue means negative correlation, white means no correlation.

<sup>b</sup> In the histogram plots, normalized distribution is plotted using 0.2 as bin width.

Table S4: Heat maps, histograms of  $C_{\alpha}$  cross-correlation matrices for all residues in VVD from RRS for both Dark and Light states. Each residue number represents a simulation in which that particular residue is subjected to rigid body constraints.

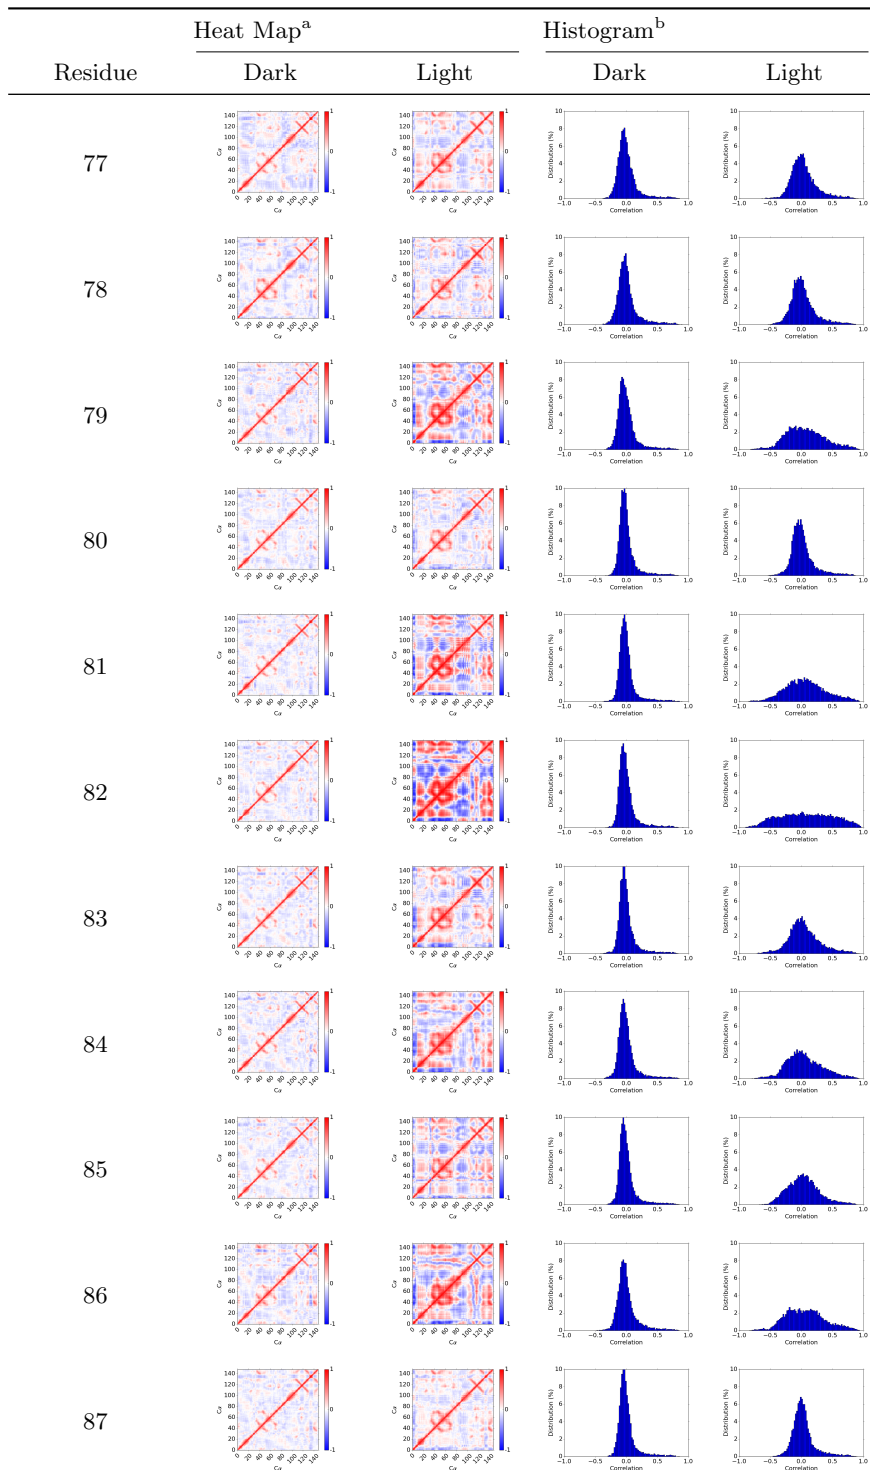

<sup>a</sup> In these heat maps, red means positive correlation, blue means negative correlation, white means no correlation.

<sup>b</sup> In the histogram plots, normalized distribution is plotted using 0.2 as bin width.

Table S4: Heat maps, histograms of  $C\alpha$  cross-correlation matrices for all residues in VVD from RRS for both Dark and Light states. Each residue number represents a simulation in which that particular residue is subjected to rigid body constraints.

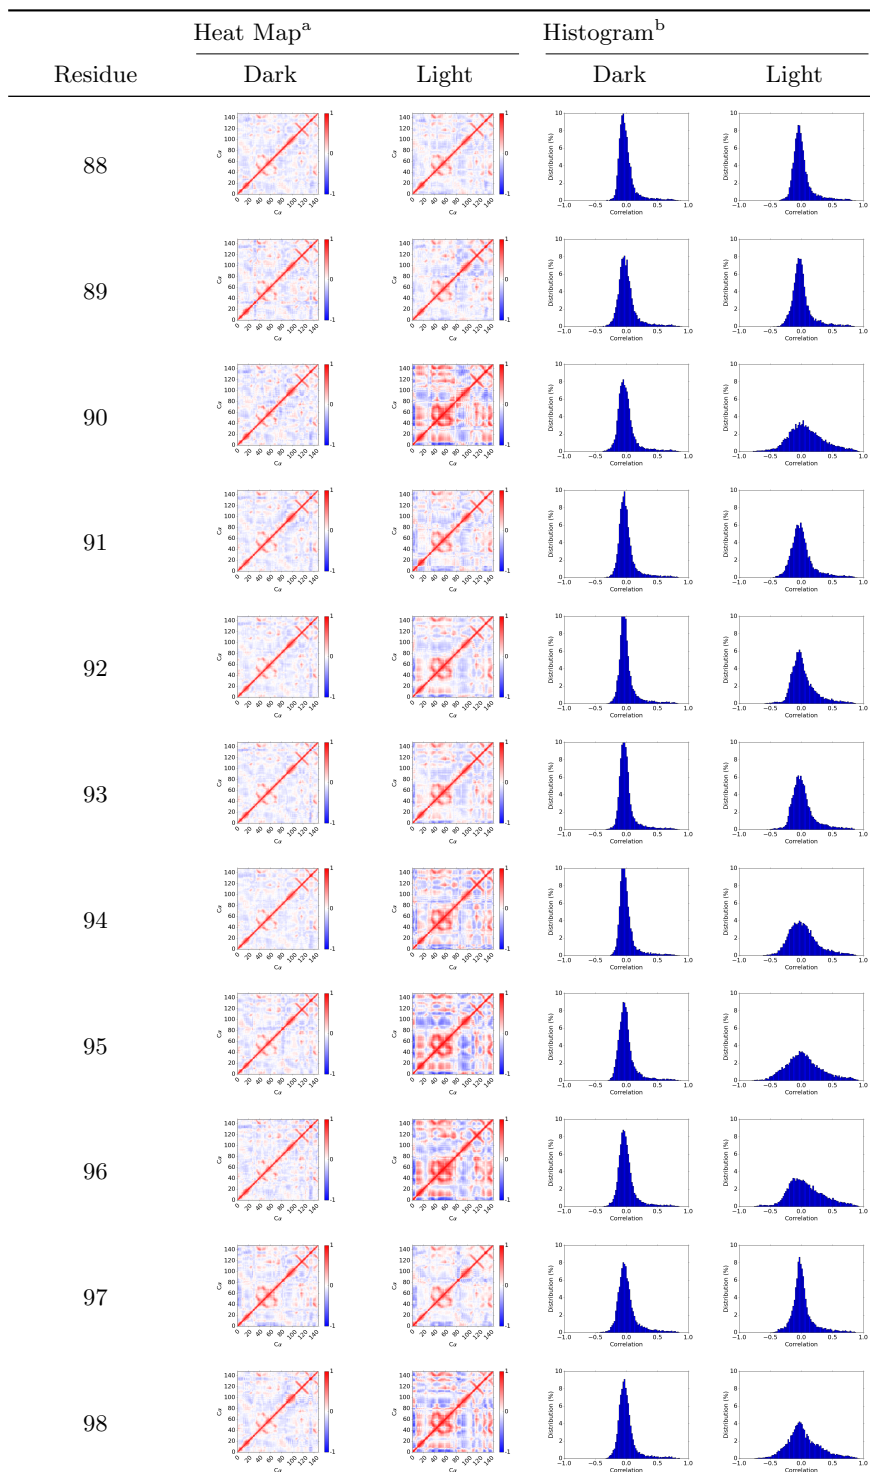

<sup>a</sup> In these heat maps, red means positive correlation, blue means negative correlation, white means no correlation.

<sup>b</sup> In the histogram plots, normalized distribution is plotted using 0.2 as bin width.

Table S4: Heat maps, histograms of  $C_{\alpha}$  cross-correlation matrices for all residues in VVD from RRS for both Dark and Light states. Each residue number represents a simulation in which that particular residue is subjected to rigid body constraints.

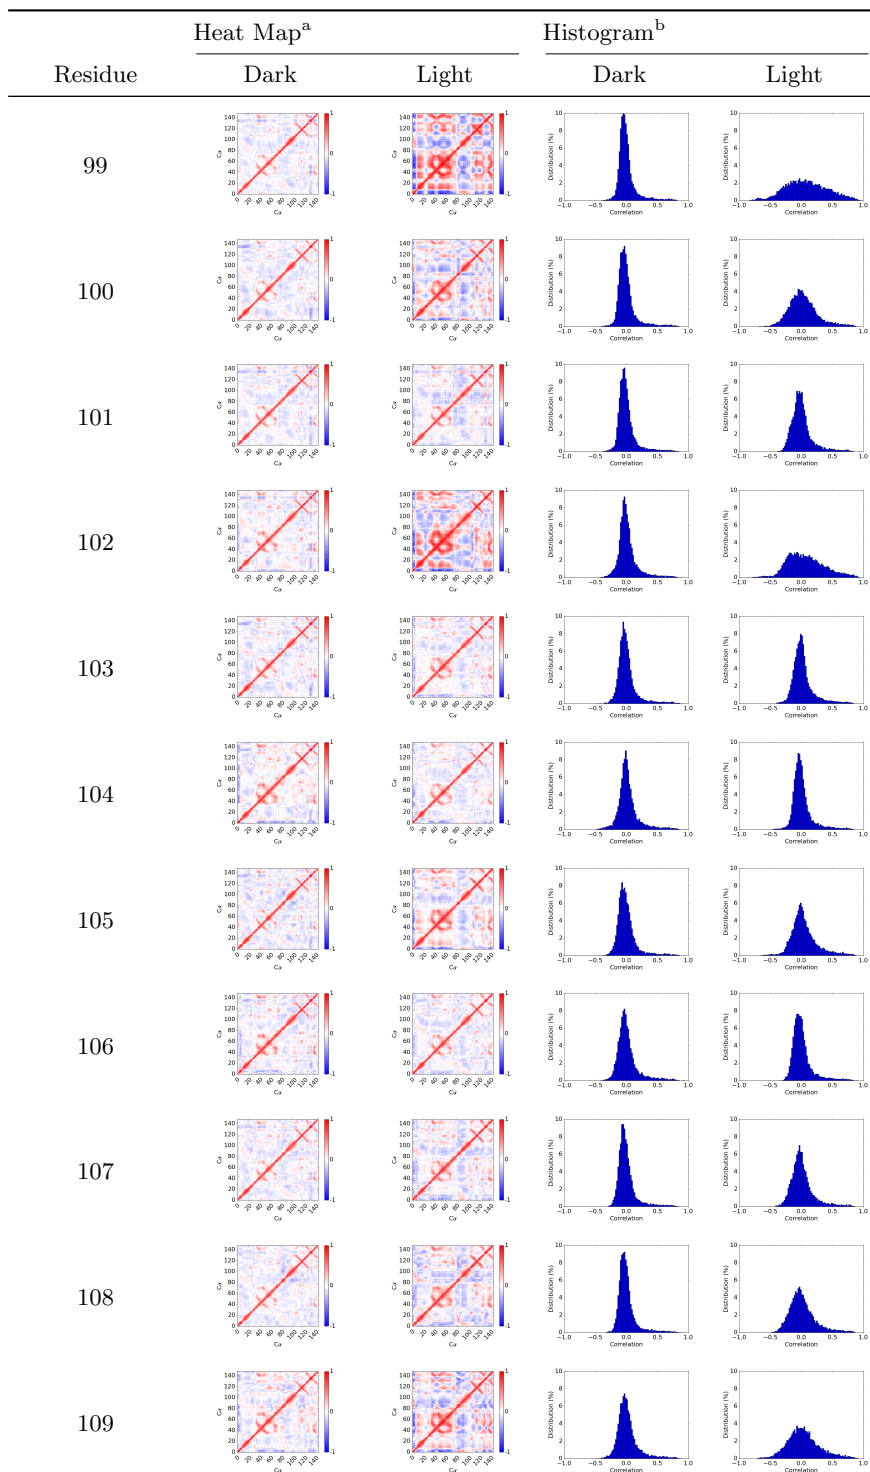

<sup>a</sup> In these heat maps, red means positive correlation, blue means negative correlation, white means no correlation.

<sup>b</sup> In the histogram plots, normalized distribution is plotted using 0.2 as bin width.

Table S4: Heat maps, histograms of  $C_{\alpha}$  cross-correlation matrices for all residues in VVD from RRS for both Dark and Light states. Each residue number represents a simulation in which that particular residue is subjected to rigid body constraints.

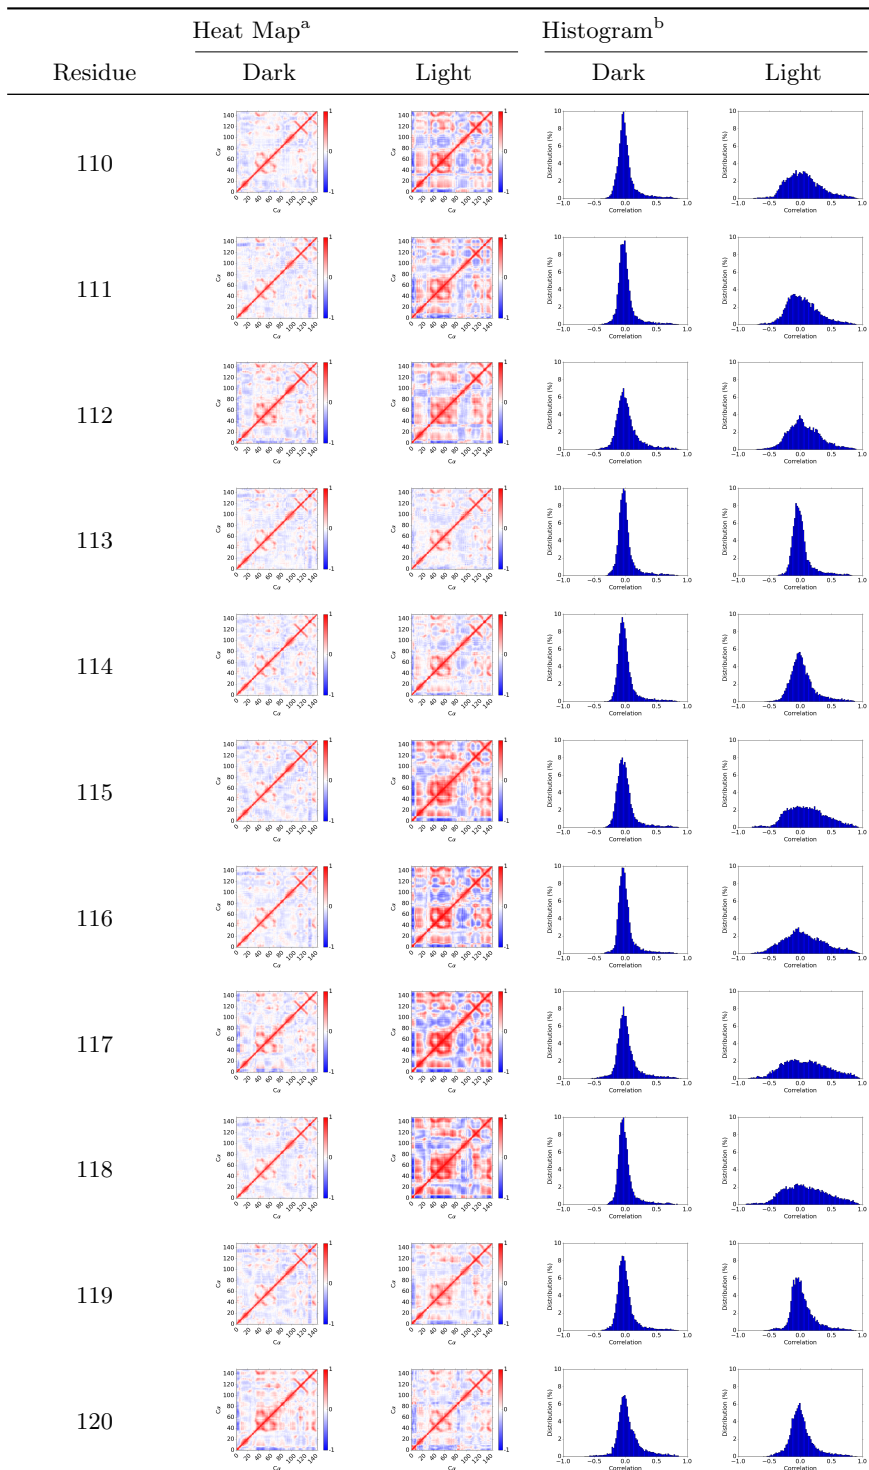

<sup>a</sup> In these heat maps, red means positive correlation, blue means negative correlation, white means no correlation.

<sup>b</sup> In the histogram plots, normalized distribution is plotted using 0.2 as bin width.

Table S4: Heat maps, histograms of  $C_{\alpha}$  cross-correlation matrices for all residues in VVD from RRS for both Dark and Light states. Each residue number represents a simulation in which that particular residue is subjected to rigid body constraints.

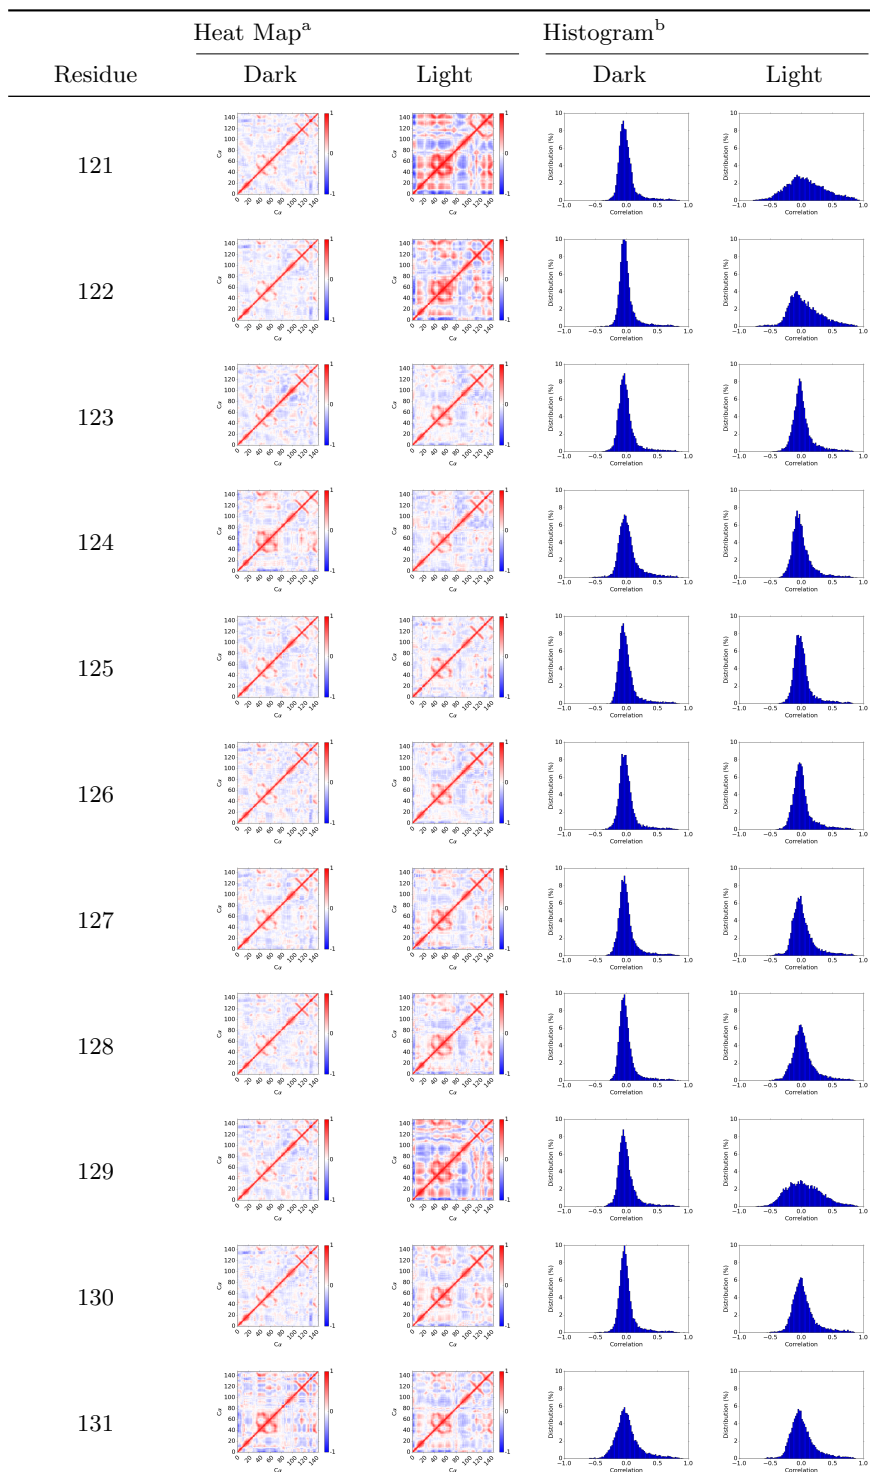

<sup>a</sup> In these heat maps, red means positive correlation, blue means negative correlation, white means no correlation.

<sup>b</sup> In the histogram plots, normalized distribution is plotted using 0.2 as bin width.



Table S4: Heat maps, histograms of  $C_{\alpha}$  cross-correlation matrices for all residues in VVD from RRS for both Dark and Light states. Each residue number represents a simulation in which that particular residue is subjected to rigid body constraints.

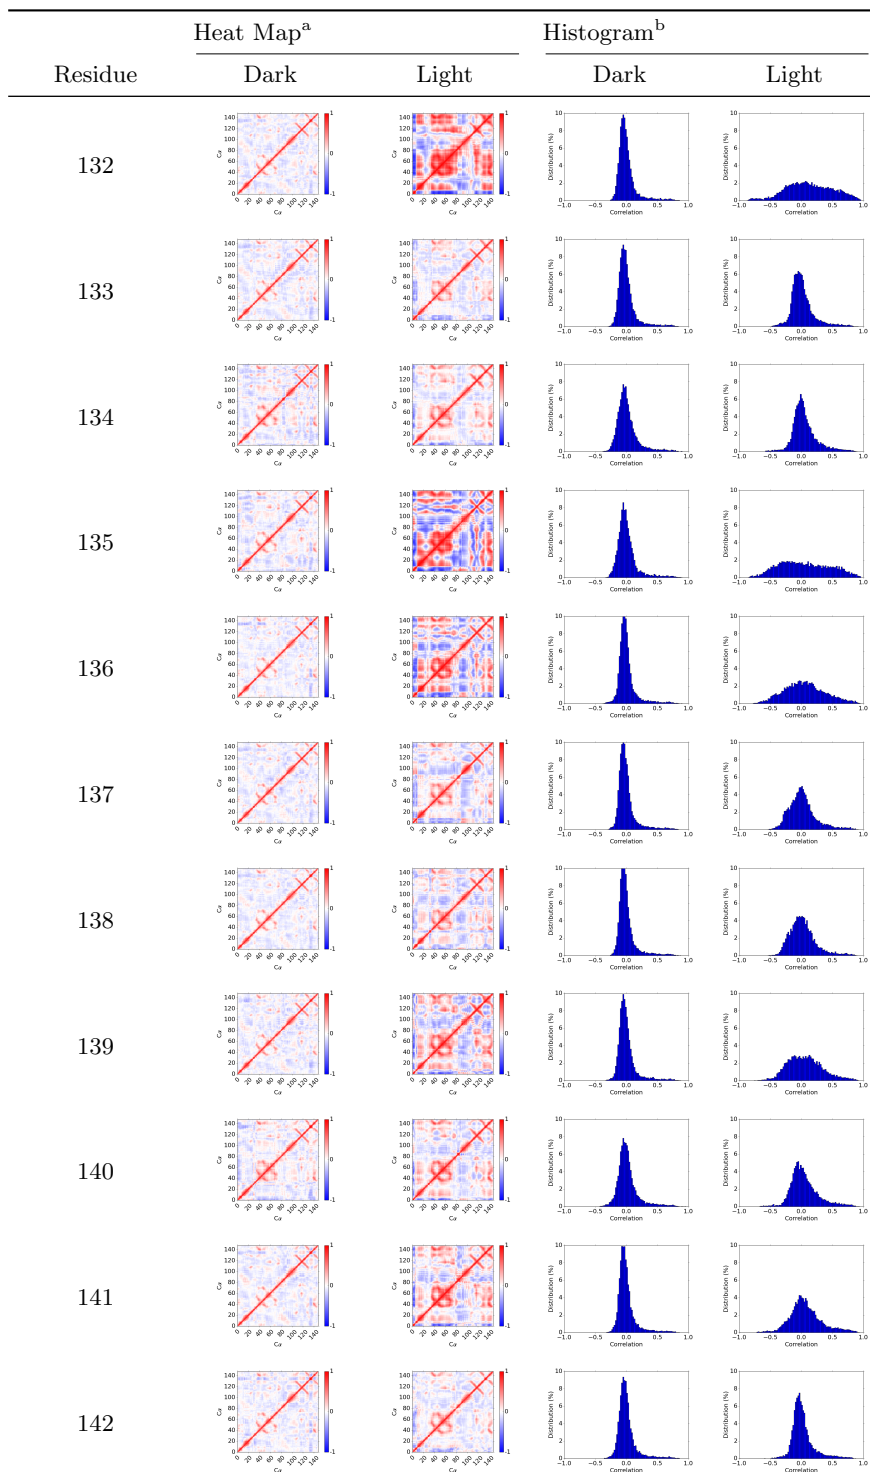

<sup>a</sup> In these heat maps, red means positive correlation, blue means negative correlation, white means no correlation.

<sup>b</sup> In the histogram plots, normalized distribution is plotted using 0.2 as bin width.

Table S4: Heat maps, histograms of  $C_{\alpha}$  cross-correlation matrices for all residues in VVD from RRS for both Dark and Light states. Each residue number represents a simulation in which that particular residue is subjected to rigid body constraints.

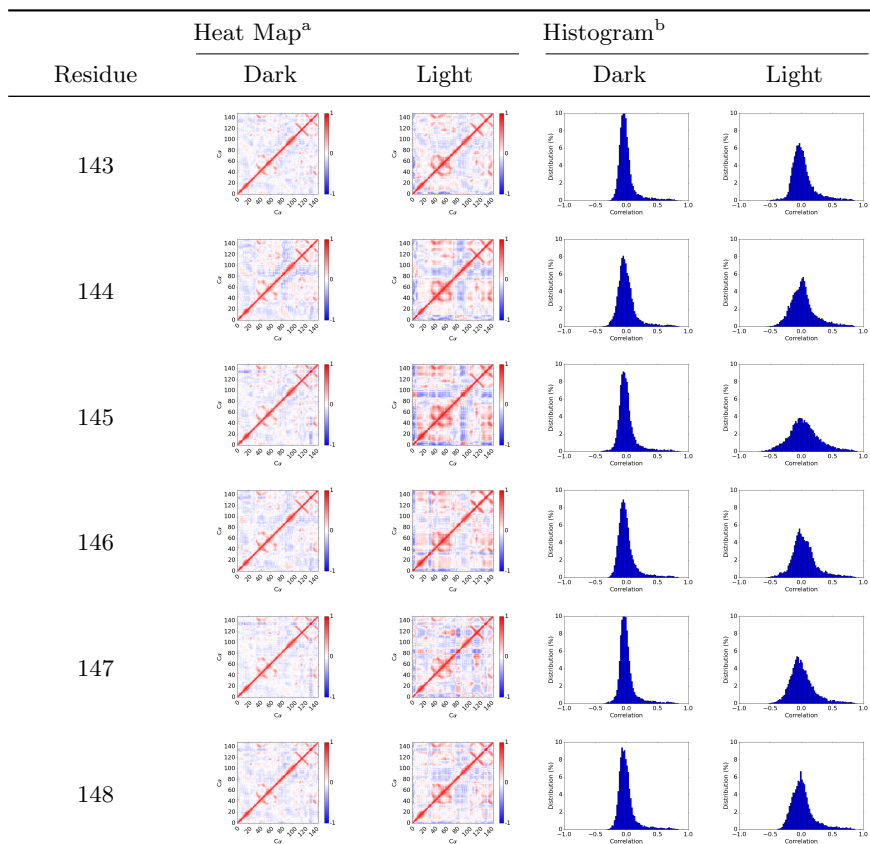

<sup>a</sup> In these heat maps, red means positive correlation, blue means negative correlation, white means no correlation.

<sup>b</sup> In the histogram plots, normalized distribution is plotted using 0.2 as bin width.

Table S5: Relative entropies ( $\Delta S$ ) and differences ( $\Delta\Delta S$ ) of VVD between Dark and Light states. Entropy of VVD from unperturbed Dark state simulation is used as the reference value, and listed as zero. The Residue column represents simulations in which that particular residue is subjected to rigid body constraints. In Delta (Absolute) column, absolute difference between relative entropies of Dark and Light states are listed.

| Residue | Dark<br>$\Delta S$ | Light<br>$\Delta S$ | Delta (Absolute)<br>$\Delta\Delta S$ |
|---------|--------------------|---------------------|--------------------------------------|
| None    | 0.000              | 0.215               | 0.215                                |
| 1       | 0.116              | 0.044               | 0.072                                |
| 2       | 0.109              | 0.009               | 0.100                                |
| 3       | -0.052             | -0.016              | 0.036                                |
| 4       | 0.020              | 0.114               | 0.094                                |
| 5       | 0.054              | 0.140               | 0.086                                |
| 6       | 0.075              | 0.256               | 0.181                                |
| 7       | 0.069              | 0.201               | 0.132                                |
| 8       | 0.066              | -0.016              | 0.082                                |
| 9       | 0.025              | -0.047              | 0.072                                |
| 10      | 0.068              | 0.160               | 0.092                                |
| 11      | 0.008              | 0.115               | 0.107                                |
| 12      | 0.125              | 0.058               | 0.067                                |
| 13      | 0.229              | 0.337               | 0.108                                |
| 14      | 0.071              | 0.023               | 0.048                                |
| 15      | 0.135              | 0.108               | 0.027                                |
| 16      | 0.035              | 0.242               | 0.207                                |
| 17      | -0.011             | 0.162               | 0.173                                |
| 18      | 0.082              | 0.122               | 0.040                                |
| 19      | 0.006              | 0.156               | 0.150                                |
| 20      | 0.161              | 0.175               | 0.014                                |
| 21      | -0.023             | 0.198               | 0.221                                |
| 22      | 0.063              | 0.162               | 0.099                                |
| 23      | 0.092              | 0.083               | 0.009                                |
| 24      | 0.033              | 0.289               | 0.256                                |
| 25      | 0.127              | 0.214               | 0.087                                |
| 26      | 0.151              | -0.019              | 0.170                                |
| 27      | 0.205              | 0.217               | 0.012                                |
| 28      | 0.004              | 0.027               | 0.023                                |
| 29      | 0.163              | 0.192               | 0.029                                |
| 30      | -0.033             | 0.087               | 0.120                                |
| 31      | 0.173              | 0.185               | 0.012                                |
| 32      | 0.084              | 0.105               | 0.021                                |
| 33      | -0.022             | 0.128               | 0.150                                |
| 34      | 0.138              | 0.086               | 0.052                                |
| 35      | 0.045              | 0.187               | 0.142                                |
| 36      | 0.119              | 0.058               | 0.061                                |
| 37      | -0.008             | 0.141               | 0.149                                |
| 38      | 0.068              | 0.125               | 0.057                                |
| 39      | 0.139              | 0.225               | 0.086                                |
| 40      | 0.084              | 0.099               | 0.015                                |
| 41      | 0.072              | 0.310               | 0.238                                |
| 42      | 0.115              | 0.125               | 0.010                                |
| 43      | -0.042             | 0.145               | 0.187                                |
| 44      | 0.064              | 0.083               | 0.019                                |
| 45      | 0.013              | 0.166               | 0.153                                |

Table S5: Relative entropies ( $\Delta S$ ) and differences ( $\Delta\Delta S$ ) of VVD between Dark and Light states. Entropy of VVD from unperturbed Dark state simulation is used as the reference value, and listed as zero. The Residue column represents simulations in which that particular residue is subjected to rigid body constraints. In Delta (Absolute) column, absolute difference between relative entropies of Dark and Light states are listed.

| Residue | Dark<br>$\Delta S$ | Light<br>$\Delta S$ | Delta (Absolute)<br>$\Delta\Delta S$ |
|---------|--------------------|---------------------|--------------------------------------|
| 46      | 0.124              | 0.181               | 0.057                                |
| 47      | 0.084              | 0.062               | 0.022                                |
| 48      | 0.032              | 0.212               | 0.180                                |
| 49      | 0.078              | 0.223               | 0.145                                |
| 50      | 0.133              | 0.156               | 0.023                                |
| 51      | 0.100              | 0.228               | 0.128                                |
| 52      | 0.070              | 0.207               | 0.137                                |
| 53      | 0.045              | 0.205               | 0.160                                |
| 54      | -0.078             | 0.139               | 0.217                                |
| 55      | 0.146              | 0.175               | 0.029                                |
| 56      | 0.044              | 0.157               | 0.113                                |
| 57      | -0.076             | 0.183               | 0.259                                |
| 58      | 0.178              | 0.173               | 0.005                                |
| 59      | 0.017              | 0.098               | 0.081                                |
| 60      | 0.006              | 0.119               | 0.113                                |
| 61      | 0.041              | 0.287               | 0.246                                |
| 62      | 0.021              | 0.200               | 0.179                                |
| 63      | 0.068              | 0.052               | 0.016                                |
| 64      | 0.092              | 0.116               | 0.024                                |
| 65      | 0.138              | 0.224               | 0.086                                |
| 66      | -0.024             | 0.050               | 0.074                                |
| 67      | 0.058              | 0.318               | 0.260                                |
| 68      | 0.024              | 0.242               | 0.218                                |
| 69      | 0.117              | 0.178               | 0.061                                |
| 70      | 0.163              | 0.083               | 0.080                                |
| 71      | 0.109              | 0.062               | 0.047                                |
| 72      | 0.188              | 0.019               | 0.169                                |
| 73      | -0.012             | 0.126               | 0.138                                |
| 74      | -0.006             | 0.045               | 0.051                                |
| 75      | -0.035             | 0.281               | 0.316                                |
| 76      | -0.009             | 0.163               | 0.172                                |
| 77      | 0.052              | 0.115               | 0.063                                |
| 78      | 0.087              | 0.244               | 0.157                                |
| 79      | 0.031              | 0.168               | 0.137                                |
| 80      | 0.019              | 0.150               | 0.131                                |
| 81      | 0.012              | 0.117               | 0.105                                |
| 82      | -0.017             | 0.277               | 0.294                                |
| 83      | -0.101             | 0.075               | 0.176                                |
| 84      | 0.117              | 0.141               | 0.024                                |
| 85      | 0.015              | 0.109               | 0.094                                |
| 86      | -0.001             | 0.246               | 0.247                                |
| 87      | 0.012              | 0.117               | 0.105                                |
| 88      | 0.008              | 0.056               | 0.048                                |
| 89      | 0.130              | 0.049               | 0.081                                |
| 90      | 0.136              | 0.236               | 0.100                                |
| 91      | 0.003              | 0.111               | 0.108                                |

Table S5: Relative entropies ( $\Delta S$ ) and differences ( $\Delta\Delta S$ ) of VVD between Dark and Light states. Entropy of VVD from unperturbed Dark state simulation is used as the reference value, and listed as zero. The Residue column represents simulations in which that particular residue is subjected to rigid body constraints. In Delta (Absolute) column, absolute difference between relative entropies of Dark and Light states are listed.

| Residue | Dark<br>$\Delta S$ | Light<br>$\Delta S$ | Delta (Absolute)<br>$\Delta\Delta S$ |
|---------|--------------------|---------------------|--------------------------------------|
| 92      | 0.026              | 0.136               | 0.110                                |
| 93      | 0.015              | 0.131               | 0.116                                |
| 94      | 0.007              | 0.158               | 0.151                                |
| 95      | 0.109              | 0.142               | 0.033                                |
| 96      | 0.146              | 0.223               | 0.077                                |
| 97      | 0.188              | 0.087               | 0.101                                |
| 98      | 0.029              | 0.260               | 0.231                                |
| 99      | -0.099             | 0.131               | 0.230                                |
| 100     | 0.045              | 0.226               | 0.181                                |
| 101     | -0.064             | -0.048              | 0.016                                |
| 102     | 0.077              | 0.219               | 0.142                                |
| 103     | 0.221              | 0.045               | 0.176                                |
| 104     | 0.108              | 0.087               | 0.021                                |
| 105     | 0.036              | 0.160               | 0.124                                |
| 106     | 0.149              | 0.067               | 0.082                                |
| 107     | 0.163              | 0.146               | 0.017                                |
| 108     | 0.053              | 0.115               | 0.062                                |
| 109     | 0.238              | 0.195               | 0.043                                |
| 110     | 0.142              | 0.190               | 0.048                                |
| 111     | 0.068              | 0.112               | 0.044                                |
| 112     | 0.150              | 0.157               | 0.007                                |
| 113     | 0.066              | 0.089               | 0.023                                |
| 114     | 0.169              | 0.221               | 0.052                                |
| 115     | 0.108              | 0.208               | 0.100                                |
| 116     | 0.039              | 0.296               | 0.257                                |
| 117     | 0.110              | 0.261               | 0.151                                |
| 118     | 0.028              | 0.261               | 0.233                                |
| 119     | 0.034              | 0.030               | 0.004                                |
| 120     | 0.190              | 0.078               | 0.112                                |
| 121     | 0.158              | 0.307               | 0.149                                |
| 122     | -0.002             | 0.079               | 0.081                                |
| 123     | -0.068             | 0.031               | 0.099                                |
| 124     | 0.166              | -0.059              | 0.225                                |
| 125     | 0.047              | 0.196               | 0.149                                |
| 126     | 0.026              | 0.054               | 0.028                                |
| 127     | 0.122              | 0.131               | 0.009                                |
| 128     | 0.102              | 0.127               | 0.025                                |
| 129     | 0.006              | 0.199               | 0.193                                |
| 130     | 0.022              | 0.227               | 0.205                                |
| 131     | 0.207              | 0.164               | 0.043                                |
| 132     | 0.040              | 0.266               | 0.226                                |
| 133     | 0.057              | 0.092               | 0.035                                |
| 134     | 0.172              | 0.132               | 0.040                                |
| 135     | 0.033              | 0.212               | 0.179                                |
| 136     | 0.012              | 0.274               | 0.262                                |
| 137     | -0.005             | 0.126               | 0.131                                |

Table S5: Relative entropies ( $\Delta S$ ) and differences ( $\Delta\Delta S$ ) of VVD between Dark and Light states. Entropy of VVD from unperturbed Dark state simulation is used as the reference value, and listed as zero. The Residue column represents simulations in which that particular residue is subjected to rigid body constraints. In Delta (Absolute) column, absolute difference between relative entropies of Dark and Light states are listed.

| Residue | Dark<br>$\Delta S$ | Light<br>$\Delta S$ | Delta (Absolute)<br>$\Delta\Delta S$ |
|---------|--------------------|---------------------|--------------------------------------|
| 138     | 0.058              | 0.129               | 0.071                                |
| 139     | 0.085              | 0.099               | 0.014                                |
| 140     | 0.136              | 0.135               | 0.001                                |
| 141     | -0.122             | 0.202               | 0.324                                |
| 142     | 0.158              | 0.008               | 0.150                                |
| 143     | -0.077             | 0.058               | 0.135                                |
| 144     | 0.091              | 0.103               | 0.012                                |
| 145     | 0.053              | 0.195               | 0.142                                |
| 146     | 0.000              | 0.081               | 0.081                                |
| 147     | 0.061              | 0.129               | 0.068                                |
| 148     | -0.012             | 0.035               | 0.047                                |

Table S6: Relative entropies ( $\Delta S$ ) and differences ( $\Delta\Delta S$ ) of VVD between Dark and Light states sorted with ascending order. Each column from Table S5 is sorted separately, therefore with separate residue list.

| #  | Rigid Dark |            | Rigid Light |            | Delta Entropy(Absolute) |                  |
|----|------------|------------|-------------|------------|-------------------------|------------------|
|    | Residue    | $\Delta S$ | Residue     | $\Delta S$ | Residue                 | $\Delta\Delta S$ |
| 1  | 141        | -0.122     | 124         | -0.059     | 140                     | 0.001            |
| 2  | 83         | -0.101     | 101         | -0.048     | 119                     | 0.004            |
| 3  | 99         | -0.099     | 9           | -0.047     | 58                      | 0.005            |
| 4  | 54         | -0.078     | 26          | -0.019     | 112                     | 0.007            |
| 5  | 143        | -0.077     | 3           | -0.016     | 127                     | 0.009            |
| 6  | 57         | -0.076     | 8           | -0.016     | 23                      | 0.009            |
| 7  | 123        | -0.068     | 142         | 0.008      | 42                      | 0.010            |
| 8  | 101        | -0.064     | 2           | 0.009      | 144                     | 0.012            |
| 9  | 3          | -0.052     | 72          | 0.019      | 31                      | 0.012            |
| 10 | 43         | -0.042     | 14          | 0.023      | 27                      | 0.012            |
| 11 | 75         | -0.035     | 28          | 0.027      | 20                      | 0.014            |
| 12 | 30         | -0.033     | 119         | 0.030      | 139                     | 0.014            |
| 13 | 66         | -0.024     | 123         | 0.031      | 40                      | 0.015            |
| 14 | 21         | -0.023     | 148         | 0.035      | 63                      | 0.016            |
| 15 | 33         | -0.022     | 1           | 0.044      | 101                     | 0.016            |
| 16 | 82         | -0.017     | 103         | 0.045      | 107                     | 0.017            |
| 17 | 73         | -0.012     | 74          | 0.045      | 44                      | 0.019            |
| 18 | 148        | -0.012     | 89          | 0.049      | 104                     | 0.021            |
| 19 | 17         | -0.011     | 66          | 0.050      | 32                      | 0.021            |
| 20 | 76         | -0.009     | 63          | 0.052      | 47                      | 0.022            |
| 21 | 37         | -0.008     | 126         | 0.054      | 50                      | 0.023            |
| 22 | 74         | -0.006     | 88          | 0.056      | 28                      | 0.023            |
| 23 | 137        | -0.005     | 12          | 0.058      | 113                     | 0.023            |
| 24 | 122        | -0.002     | 36          | 0.058      | 64                      | 0.024            |
| 25 | 86         | -0.001     | 143         | 0.058      | 84                      | 0.024            |
| 26 | 0          | 0.000      | 47          | 0.062      | 128                     | 0.025            |
| 27 | 146        | 0.000      | 71          | 0.062      | 15                      | 0.027            |
| 28 | 91         | 0.003      | 106         | 0.067      | 126                     | 0.028            |
| 29 | 28         | 0.004      | 83          | 0.075      | 55                      | 0.029            |
| 30 | 60         | 0.006      | 120         | 0.078      | 29                      | 0.029            |
| 31 | 19         | 0.006      | 122         | 0.079      | 95                      | 0.033            |
| 32 | 129        | 0.006      | 146         | 0.081      | 133                     | 0.035            |
| 33 | 94         | 0.007      | 23          | 0.083      | 3                       | 0.036            |
| 34 | 88         | 0.008      | 70          | 0.083      | 134                     | 0.040            |
| 35 | 11         | 0.008      | 44          | 0.083      | 18                      | 0.040            |
| 36 | 87         | 0.012      | 34          | 0.086      | 131                     | 0.043            |
| 37 | 136        | 0.012      | 30          | 0.087      | 109                     | 0.043            |
| 38 | 81         | 0.012      | 104         | 0.087      | 111                     | 0.044            |
| 39 | 45         | 0.013      | 97          | 0.087      | 71                      | 0.047            |
| 40 | 93         | 0.015      | 113         | 0.089      | 148                     | 0.047            |
| 41 | 85         | 0.015      | 133         | 0.092      | 88                      | 0.048            |
| 42 | 59         | 0.017      | 59          | 0.098      | 14                      | 0.048            |
| 43 | 80         | 0.019      | 139         | 0.099      | 110                     | 0.048            |
| 44 | 4          | 0.020      | 40          | 0.099      | 74                      | 0.051            |
| 45 | 62         | 0.021      | 144         | 0.103      | 114                     | 0.052            |
| 46 | 130        | 0.022      | 32          | 0.105      | 34                      | 0.052            |
| 47 | 68         | 0.024      | 15          | 0.108      | 46                      | 0.057            |
| 48 | 9          | 0.025      | 85          | 0.109      | 38                      | 0.057            |

Table S6: Relative entropies ( $\Delta S$ ) and differences ( $\Delta\Delta S$ ) of VVD between Dark and Light states sorted with ascending order. Each column from Table S5 is sorted separately, therefore with separate residue list.

| #  | Rigid Dark |            | Rigid Light |            | Delta Entropy(Absolute) |                  |
|----|------------|------------|-------------|------------|-------------------------|------------------|
|    | Residue    | $\Delta S$ | Residue     | $\Delta S$ | Residue                 | $\Delta\Delta S$ |
| 49 | 126        | 0.026      | 91          | 0.111      | 69                      | 0.061            |
| 50 | 92         | 0.026      | 111         | 0.112      | 36                      | 0.061            |
| 51 | 118        | 0.028      | 4           | 0.114      | 108                     | 0.062            |
| 52 | 98         | 0.029      | 11          | 0.115      | 77                      | 0.063            |
| 53 | 79         | 0.031      | 77          | 0.115      | 12                      | 0.067            |
| 54 | 48         | 0.032      | 108         | 0.115      | 147                     | 0.068            |
| 55 | 24         | 0.033      | 64          | 0.116      | 138                     | 0.071            |
| 56 | 135        | 0.033      | 81          | 0.117      | 1                       | 0.072            |
| 57 | 119        | 0.034      | 87          | 0.117      | 9                       | 0.072            |
| 58 | 16         | 0.035      | 60          | 0.119      | 66                      | 0.074            |
| 59 | 105        | 0.036      | 18          | 0.122      | 96                      | 0.077            |
| 60 | 116        | 0.039      | 42          | 0.125      | 70                      | 0.080            |
| 61 | 132        | 0.040      | 38          | 0.125      | 59                      | 0.081            |
| 62 | 61         | 0.041      | 73          | 0.126      | 122                     | 0.081            |
| 63 | 56         | 0.044      | 137         | 0.126      | 89                      | 0.081            |
| 64 | 35         | 0.045      | 128         | 0.127      | 146                     | 0.081            |
| 65 | 53         | 0.045      | 33          | 0.128      | 106                     | 0.082            |
| 66 | 100        | 0.045      | 138         | 0.129      | 8                       | 0.082            |
| 67 | 125        | 0.047      | 147         | 0.129      | 5                       | 0.086            |
| 68 | 77         | 0.052      | 99          | 0.131      | 39                      | 0.086            |
| 69 | 108        | 0.053      | 127         | 0.131      | 65                      | 0.086            |
| 70 | 145        | 0.053      | 93          | 0.131      | 25                      | 0.087            |
| 71 | 5          | 0.054      | 134         | 0.132      | 10                      | 0.092            |
| 72 | 133        | 0.057      | 140         | 0.135      | 4                       | 0.094            |
| 73 | 67         | 0.058      | 92          | 0.136      | 85                      | 0.094            |
| 74 | 138        | 0.058      | 54          | 0.139      | 123                     | 0.099            |
| 75 | 147        | 0.061      | 5           | 0.140      | 22                      | 0.099            |
| 76 | 22         | 0.063      | 84          | 0.141      | 2                       | 0.100            |
| 77 | 44         | 0.064      | 37          | 0.141      | 90                      | 0.100            |
| 78 | 113        | 0.066      | 95          | 0.142      | 115                     | 0.100            |
| 79 | 8          | 0.066      | 43          | 0.145      | 97                      | 0.101            |
| 80 | 111        | 0.068      | 107         | 0.146      | 81                      | 0.105            |
| 81 | 38         | 0.068      | 80          | 0.150      | 87                      | 0.105            |
| 82 | 10         | 0.068      | 19          | 0.156      | 11                      | 0.107            |
| 83 | 63         | 0.068      | 50          | 0.156      | 91                      | 0.108            |
| 84 | 7          | 0.069      | 56          | 0.157      | 13                      | 0.108            |
| 85 | 52         | 0.070      | 112         | 0.157      | 92                      | 0.110            |
| 86 | 14         | 0.071      | 94          | 0.158      | 120                     | 0.112            |
| 87 | 41         | 0.072      | 105         | 0.160      | 60                      | 0.113            |
| 88 | 6          | 0.075      | 10          | 0.160      | 56                      | 0.113            |
| 89 | 102        | 0.077      | 17          | 0.162      | 93                      | 0.116            |
| 90 | 49         | 0.078      | 22          | 0.162      | 30                      | 0.120            |
| 91 | 18         | 0.082      | 76          | 0.163      | 105                     | 0.124            |
| 92 | 32         | 0.084      | 131         | 0.164      | 51                      | 0.128            |
| 93 | 40         | 0.084      | 45          | 0.166      | 80                      | 0.131            |
| 94 | 47         | 0.084      | 79          | 0.168      | 137                     | 0.131            |
| 95 | 139        | 0.085      | 58          | 0.173      | 7                       | 0.132            |
| 96 | 78         | 0.087      | 20          | 0.175      | 143                     | 0.135            |



Table S6: Relative entropies ( $\Delta S$ ) and differences ( $\Delta\Delta S$ ) of VVD between Dark and Light states sorted with ascending order. Each column from Table S5 is sorted separately, therefore with separate residue list.

| #   | Rigid Dark |            | Rigid Light |            | Delta Entropy(Absolute) |                  |
|-----|------------|------------|-------------|------------|-------------------------|------------------|
|     | Residue    | $\Delta S$ | Residue     | $\Delta S$ | Residue                 | $\Delta\Delta S$ |
| 97  | 144        | 0.091      | 55          | 0.175      | 52                      | 0.137            |
| 98  | 64         | 0.092      | 69          | 0.178      | 79                      | 0.137            |
| 99  | 23         | 0.092      | 46          | 0.181      | 73                      | 0.138            |
| 100 | 51         | 0.100      | 57          | 0.183      | 102                     | 0.142            |
| 101 | 128        | 0.102      | 31          | 0.185      | 35                      | 0.142            |
| 102 | 115        | 0.108      | 35          | 0.187      | 145                     | 0.142            |
| 103 | 104        | 0.108      | 110         | 0.190      | 49                      | 0.145            |
| 104 | 71         | 0.109      | 29          | 0.192      | 121                     | 0.149            |
| 105 | 2          | 0.109      | 145         | 0.195      | 37                      | 0.149            |
| 106 | 95         | 0.109      | 109         | 0.195      | 125                     | 0.149            |
| 107 | 117        | 0.110      | 125         | 0.196      | 19                      | 0.150            |
| 108 | 42         | 0.115      | 21          | 0.198      | 142                     | 0.150            |
| 109 | 1          | 0.116      | 129         | 0.199      | 33                      | 0.150            |
| 110 | 69         | 0.117      | 62          | 0.200      | 94                      | 0.151            |
| 111 | 84         | 0.117      | 7           | 0.201      | 117                     | 0.151            |
| 112 | 36         | 0.119      | 141         | 0.202      | 45                      | 0.153            |
| 113 | 127        | 0.122      | 53          | 0.205      | 78                      | 0.157            |
| 114 | 46         | 0.124      | 52          | 0.207      | 53                      | 0.160            |
| 115 | 12         | 0.125      | 115         | 0.208      | 72                      | 0.169            |
| 116 | 25         | 0.127      | 48          | 0.212      | 26                      | 0.170            |
| 117 | 89         | 0.130      | 135         | 0.212      | 76                      | 0.172            |
| 118 | 50         | 0.133      | 25          | 0.214      | 17                      | 0.173            |
| 119 | 15         | 0.135      | 0           | 0.215      | 83                      | 0.176            |
| 120 | 140        | 0.136      | 27          | 0.217      | 103                     | 0.176            |
| 121 | 90         | 0.136      | 102         | 0.219      | 62                      | 0.179            |
| 122 | 34         | 0.138      | 114         | 0.221      | 135                     | 0.179            |
| 123 | 65         | 0.138      | 96          | 0.223      | 48                      | 0.180            |
| 124 | 39         | 0.139      | 49          | 0.223      | 100                     | 0.181            |
| 125 | 110        | 0.142      | 65          | 0.224      | 6                       | 0.181            |
| 126 | 96         | 0.146      | 39          | 0.225      | 43                      | 0.187            |
| 127 | 55         | 0.146      | 100         | 0.226      | 129                     | 0.193            |
| 128 | 106        | 0.149      | 130         | 0.227      | 130                     | 0.205            |
| 129 | 112        | 0.150      | 51          | 0.228      | 16                      | 0.207            |
| 130 | 26         | 0.151      | 90          | 0.236      | 0                       | 0.215            |
| 131 | 142        | 0.158      | 16          | 0.242      | 54                      | 0.217            |
| 132 | 121        | 0.158      | 68          | 0.242      | 68                      | 0.218            |
| 133 | 20         | 0.161      | 78          | 0.244      | 21                      | 0.221            |
| 134 | 107        | 0.163      | 86          | 0.246      | 124                     | 0.225            |
| 135 | 70         | 0.163      | 6           | 0.256      | 132                     | 0.226            |
| 136 | 29         | 0.163      | 98          | 0.260      | 99                      | 0.230            |
| 137 | 124        | 0.166      | 117         | 0.261      | 98                      | 0.231            |
| 138 | 114        | 0.169      | 118         | 0.261      | 118                     | 0.233            |
| 139 | 134        | 0.172      | 132         | 0.266      | 41                      | 0.238            |
| 140 | 31         | 0.173      | 136         | 0.274      | 61                      | 0.246            |
| 141 | 58         | 0.178      | 82          | 0.277      | 86                      | 0.247            |
| 142 | 72         | 0.188      | 75          | 0.281      | 24                      | 0.256            |
| 143 | 97         | 0.188      | 61          | 0.287      | 116                     | 0.257            |
| 144 | 120        | 0.190      | 24          | 0.289      | 57                      | 0.259            |

Table S6: Relative entropies ( $\Delta S$ ) and differences ( $\Delta\Delta S$ ) of VVD between Dark and Light states sorted with ascending order. Each column from Table S5 is sorted separately, therefore with separate residue list.

| #   | Rigid Dark |            | Rigid Light |            | Delta Entropy(Absolute) |                  |
|-----|------------|------------|-------------|------------|-------------------------|------------------|
|     | Residue    | $\Delta S$ | Residue     | $\Delta S$ | Residue                 | $\Delta\Delta S$ |
| 145 | 27         | 0.205      | 116         | 0.296      | 67                      | 0.260            |
| 146 | 131        | 0.207      | 121         | 0.307      | 136                     | 0.262            |
| 147 | 103        | 0.221      | 41          | 0.310      | 82                      | 0.294            |
| 148 | 13         | 0.229      | 67          | 0.318      | 75                      | 0.316            |
| 149 | 109        | 0.238      | 13          | 0.337      | 141                     | 0.324            |

Table S7: Projections of all simulations onto the PC1 mode generated from principal component analysis (PCA) of the unperturbed Light state simulation with optimized Dark state structure as reference. )

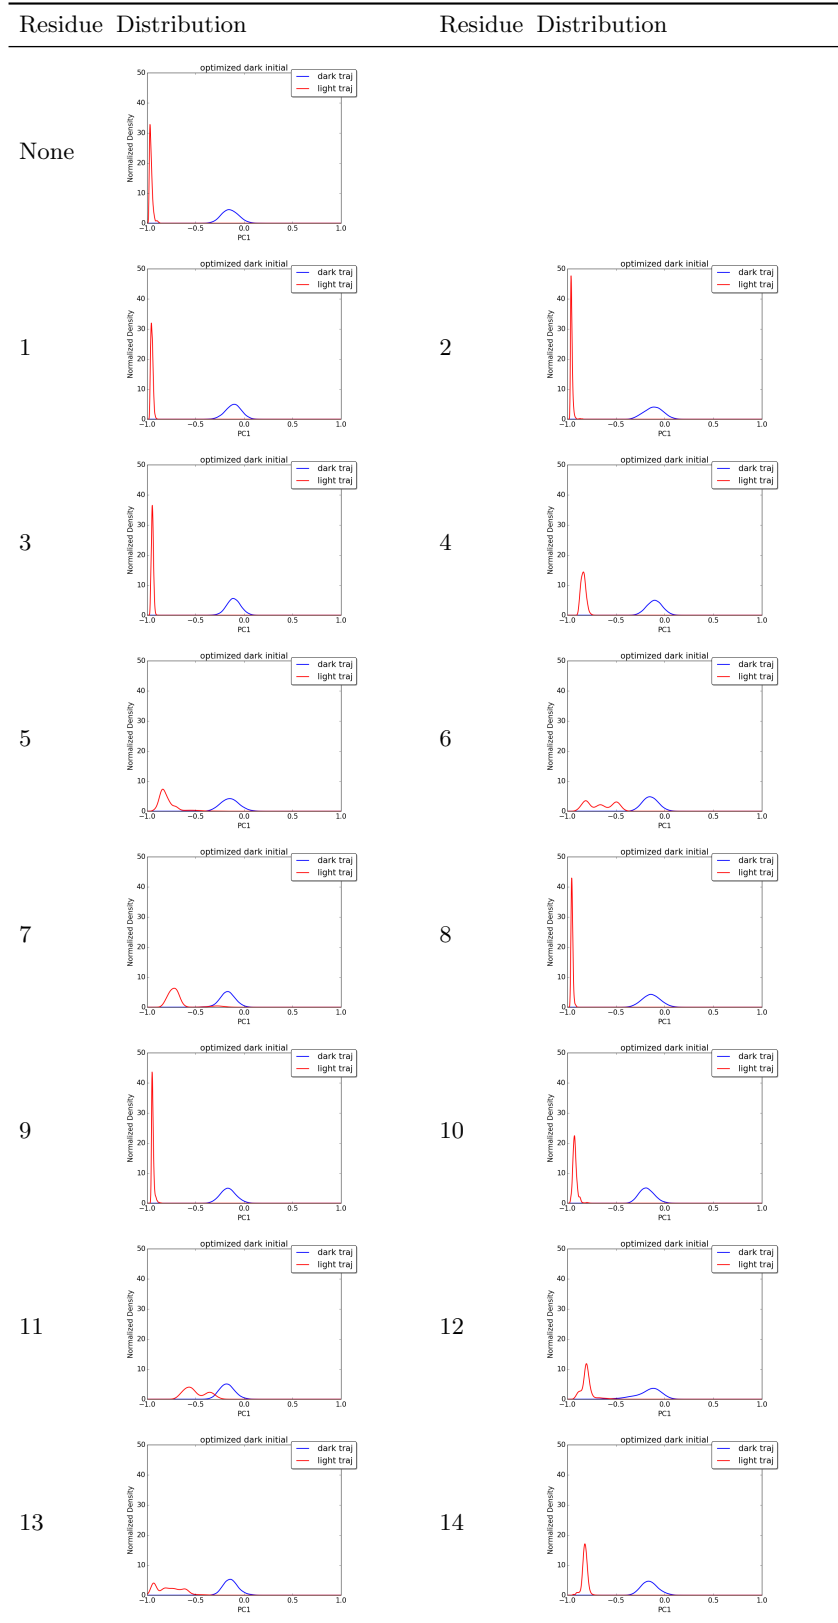

Table S7: Projections of all simulations onto the PC1 mode generated from principal component analysis (PCA) of the unperturbed Light state simulation with optimized Dark state structure as reference.

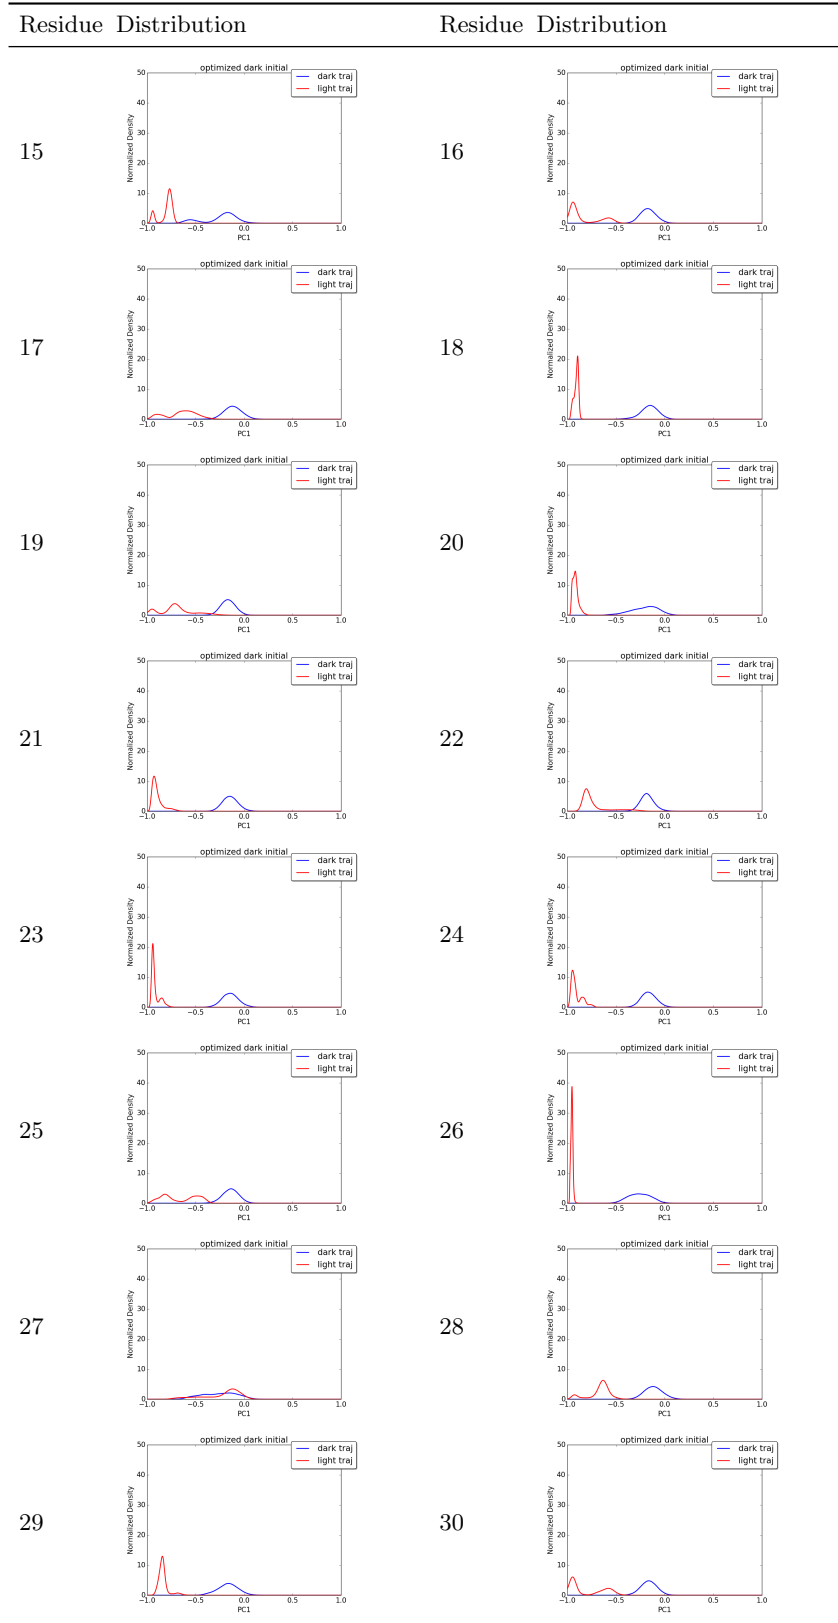

Table S7: Projections of all simulations onto the PC1 mode generated from principal component analysis (PCA) of the unperturbed Light state simulation with optimized Dark state structure as reference.

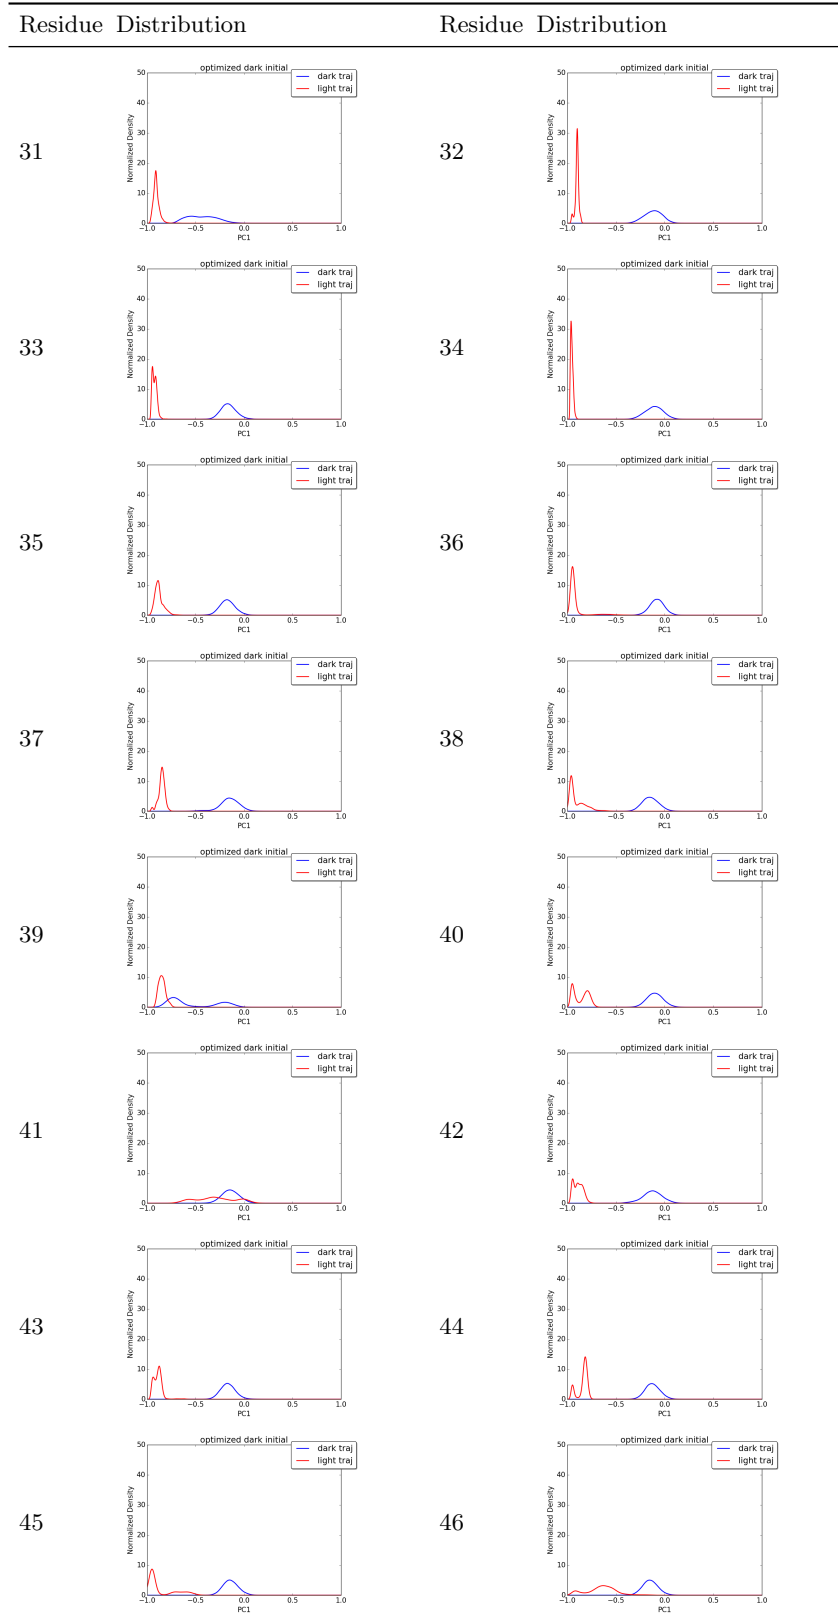

Table S7: Projections of all simulations onto the PC1 mode generated from principal component analysis (PCA) of the unperturbed Light state simulation with optimized Dark state structure as reference.

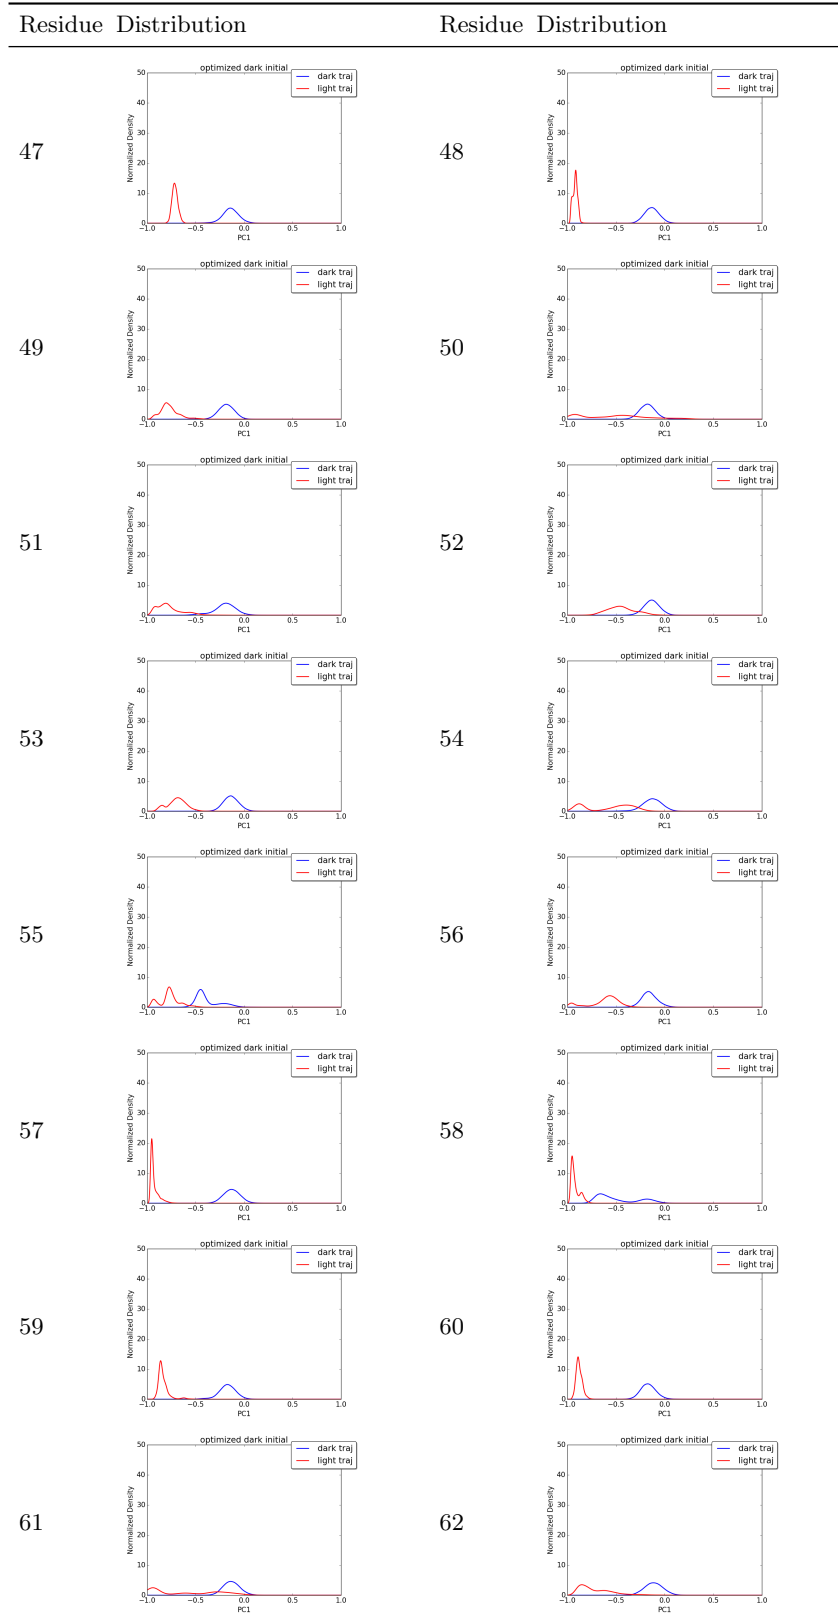

Table S7: Projections of all simulations onto the PC1 mode generated from principal component analysis (PCA) of the unperturbed Light state simulation with optimized Dark state structure as reference.

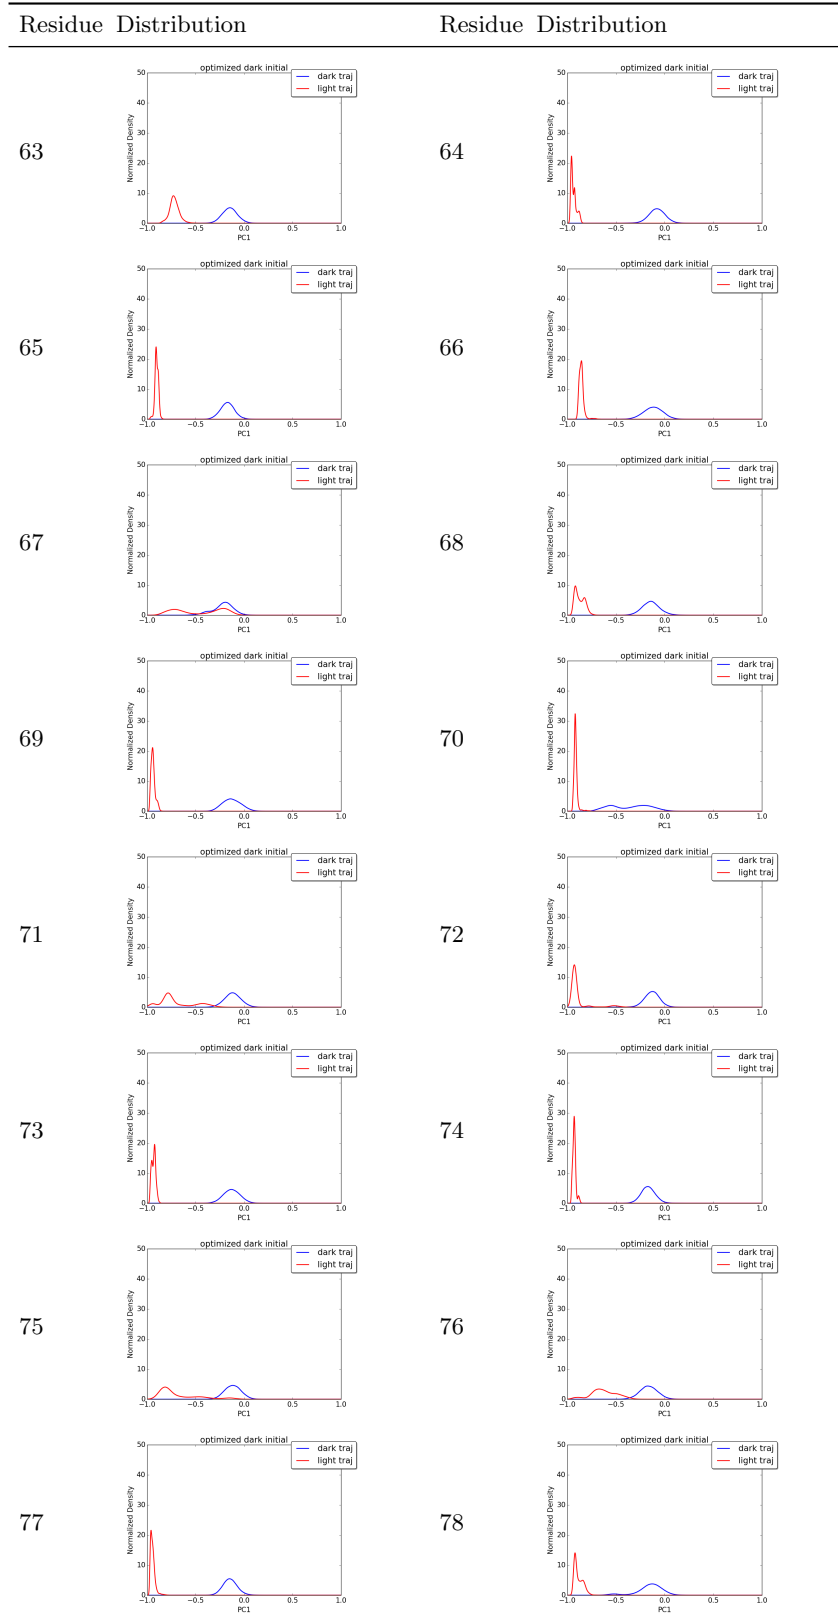

Table S7: Projections of all simulations onto the PC1 mode generated from principal component analysis (PCA) of the unperturbed Light state simulation with optimized Dark state structure as reference.

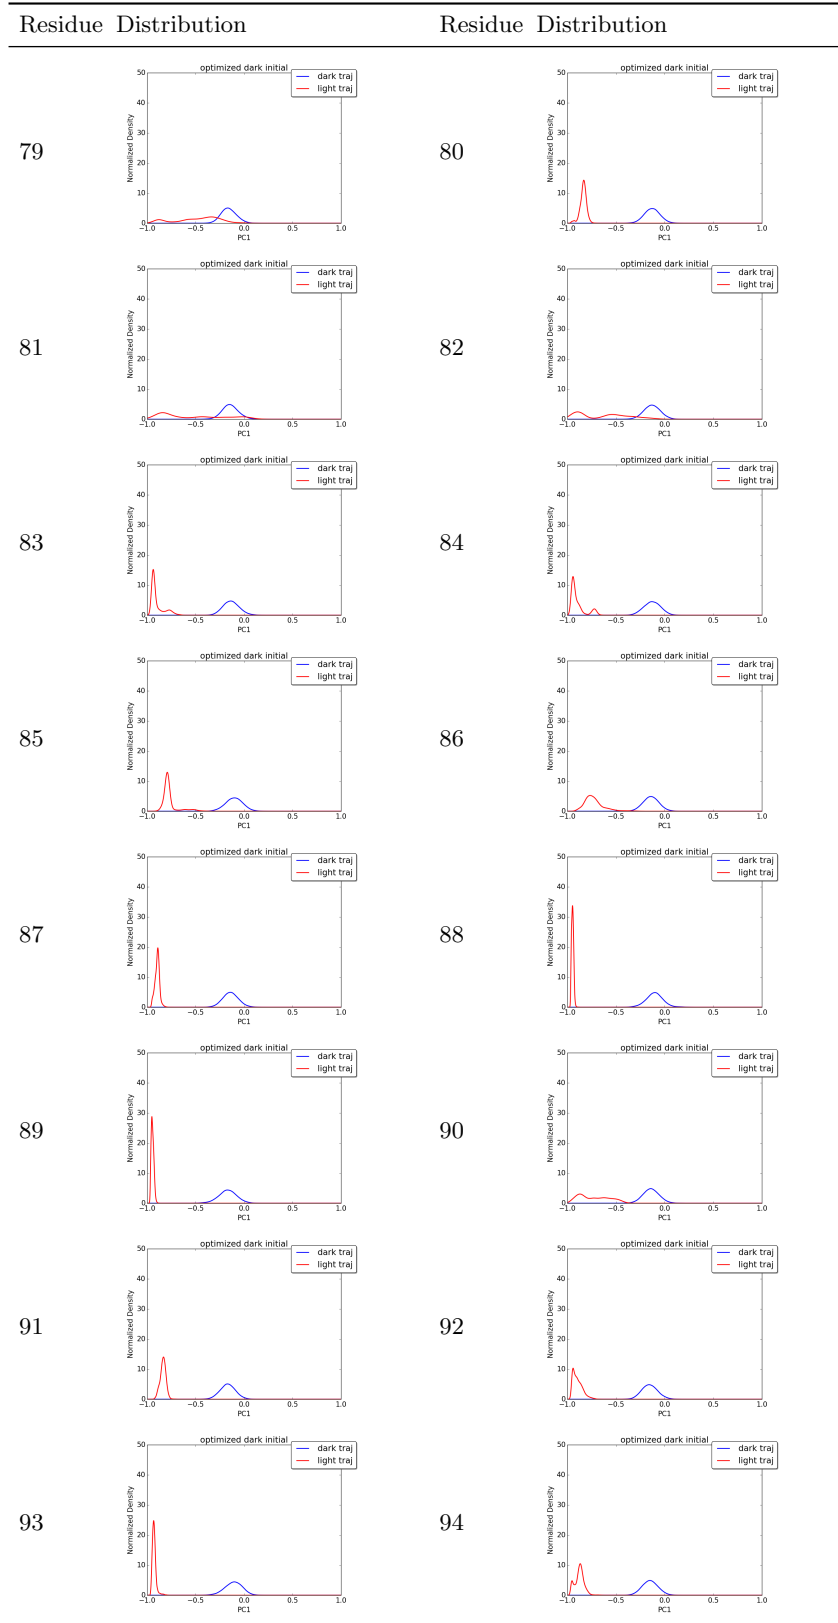



Table S7: Projections of all simulations onto the PC1 mode generated from principal component analysis (PCA) of the unperturbed Light state simulation with optimized Dark state structure as reference.

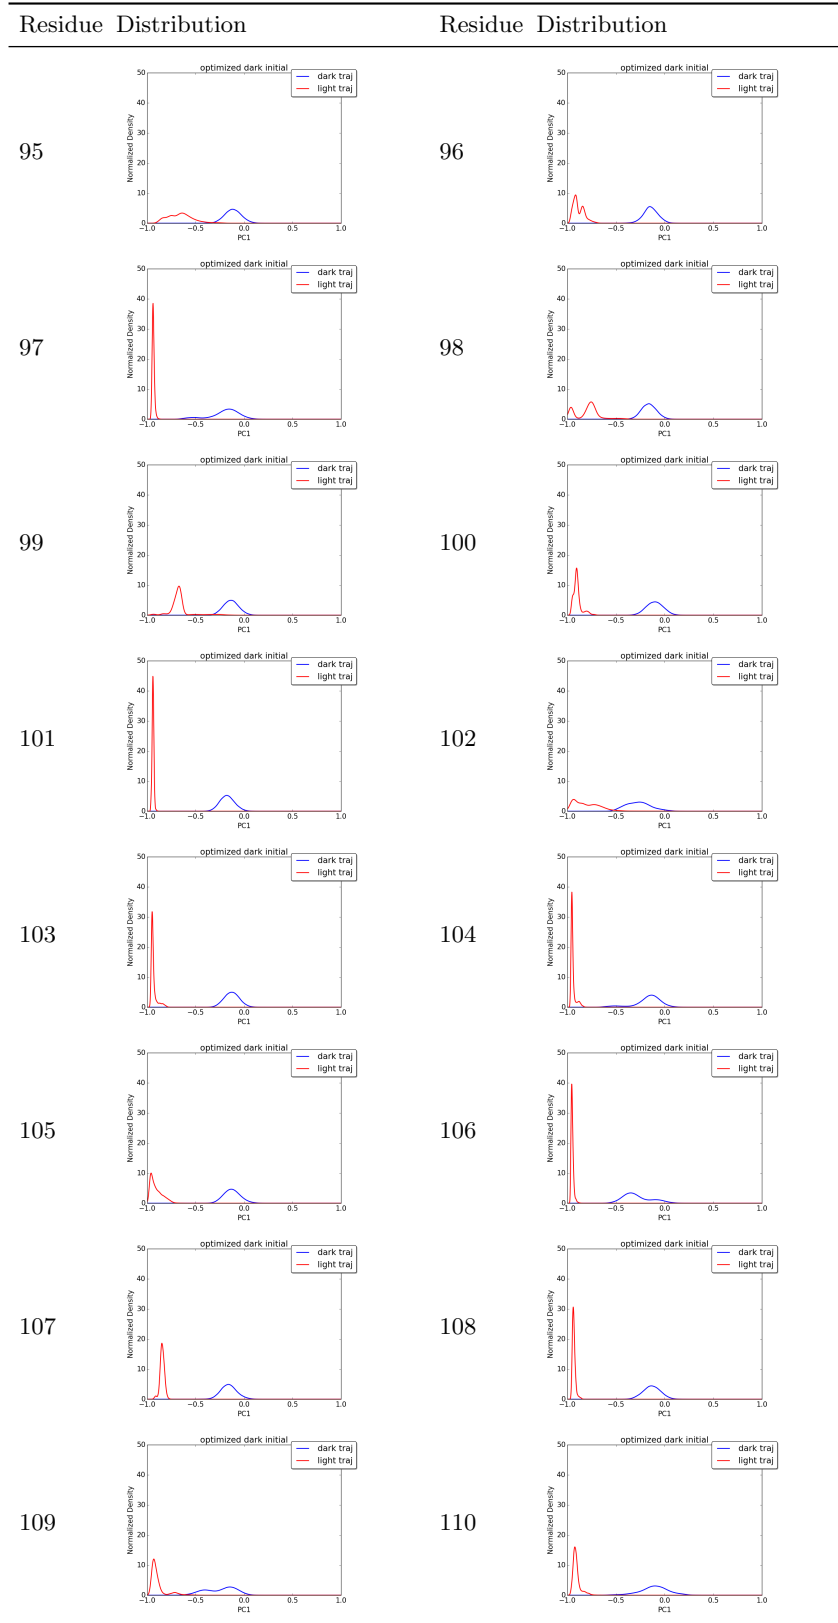

Table S7: Projections of all simulations onto the PC1 mode generated from principal component analysis (PCA) of the unperturbed Light state simulation with optimized Dark state structure as reference.

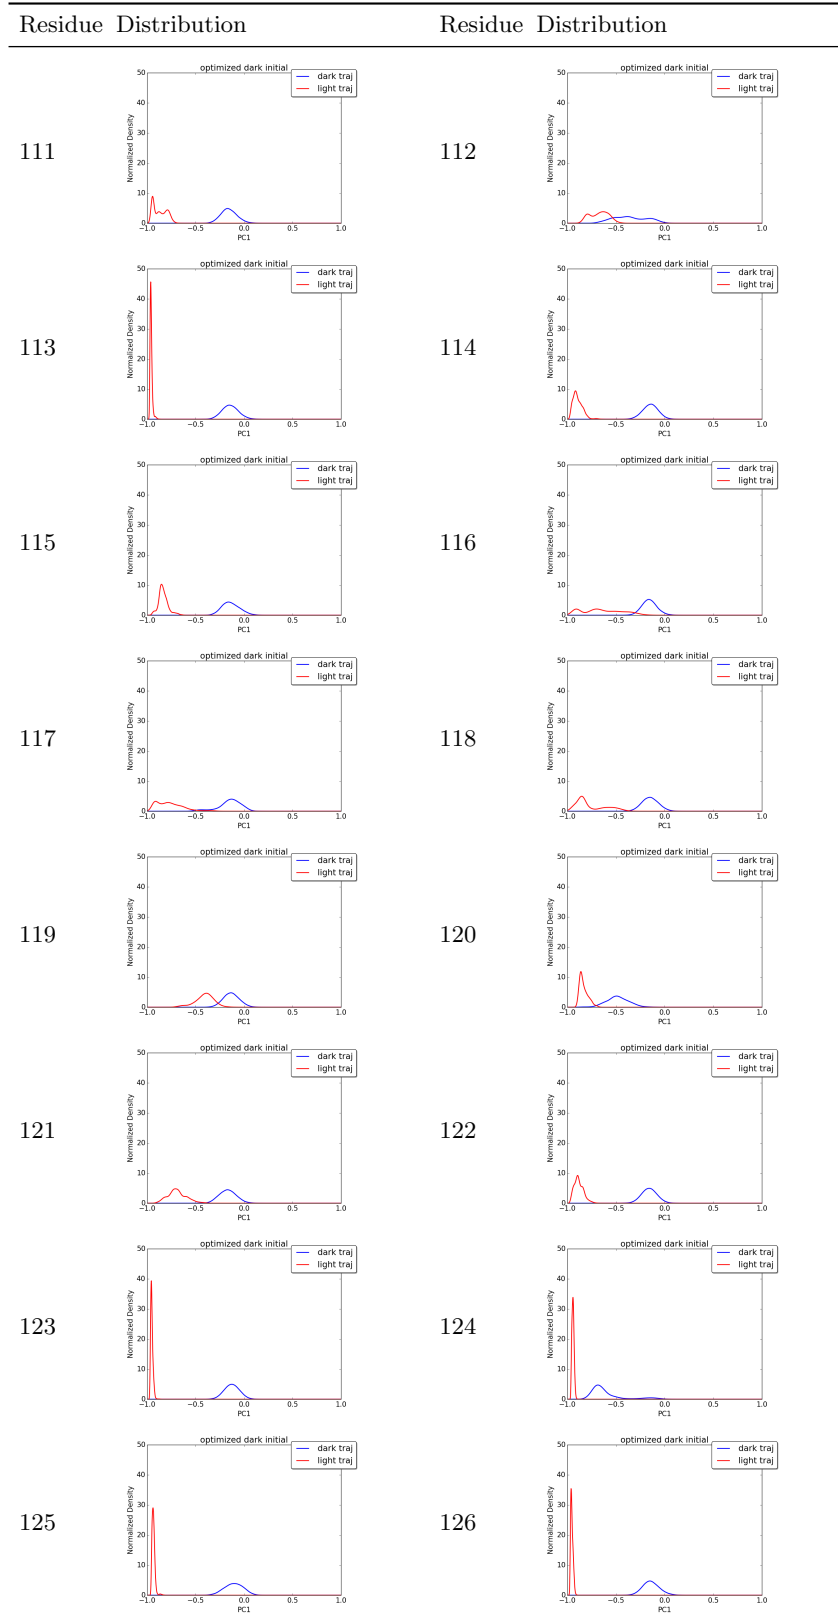

Table S7: Projections of all simulations onto the PC1 mode generated from principal component analysis (PCA) of the unperturbed Light state simulation with optimized Dark state structure as reference.

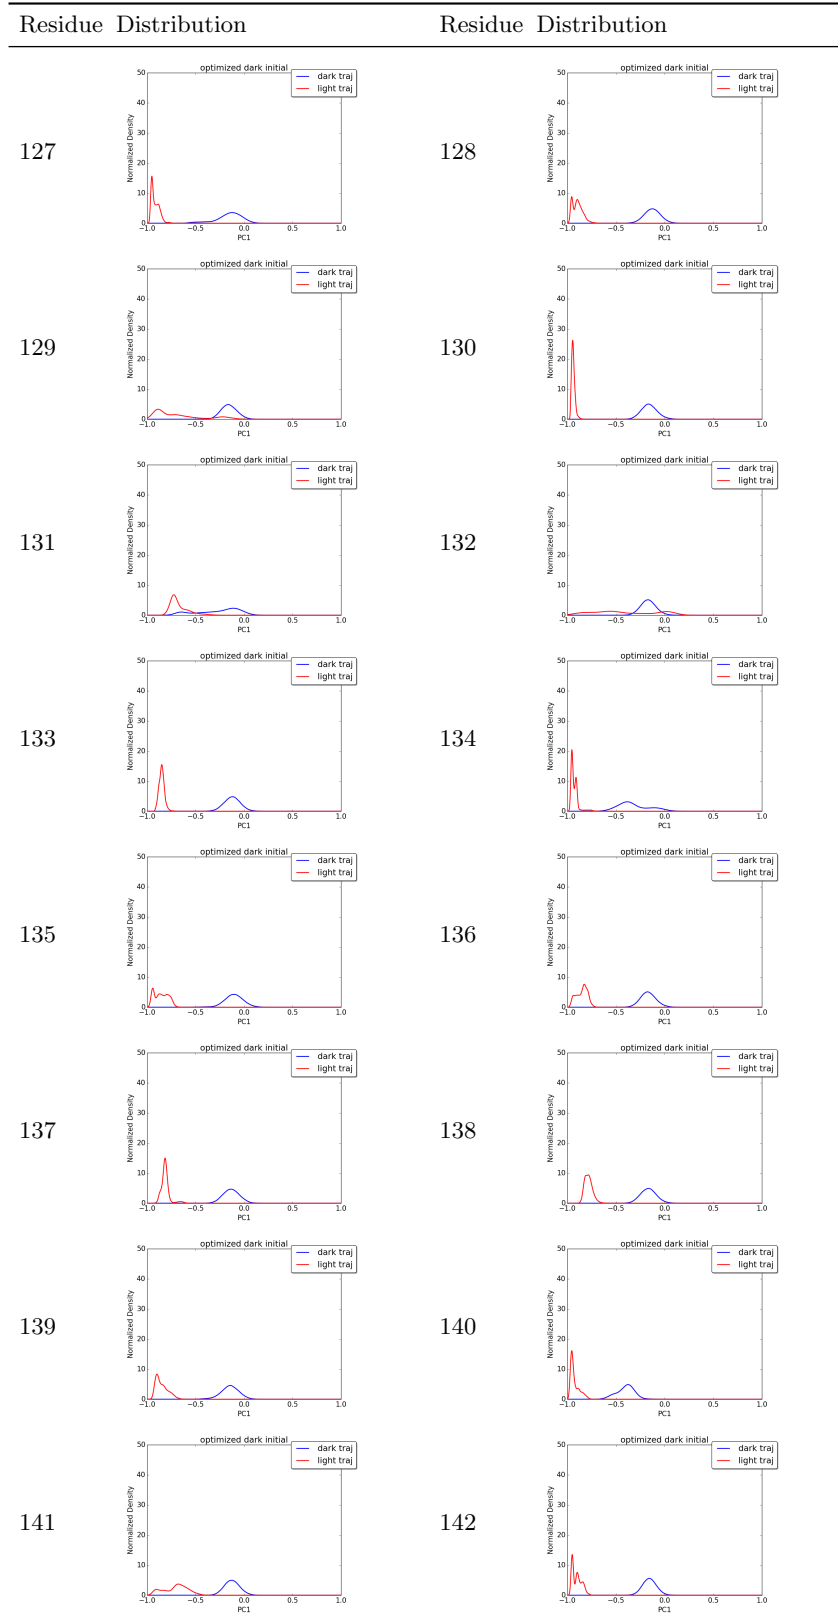

Table S7: Projections of all simulations onto the PC1 mode generated from principal component analysis (PCA) of the unperturbed Light state simulation with optimized Dark state structure as reference.

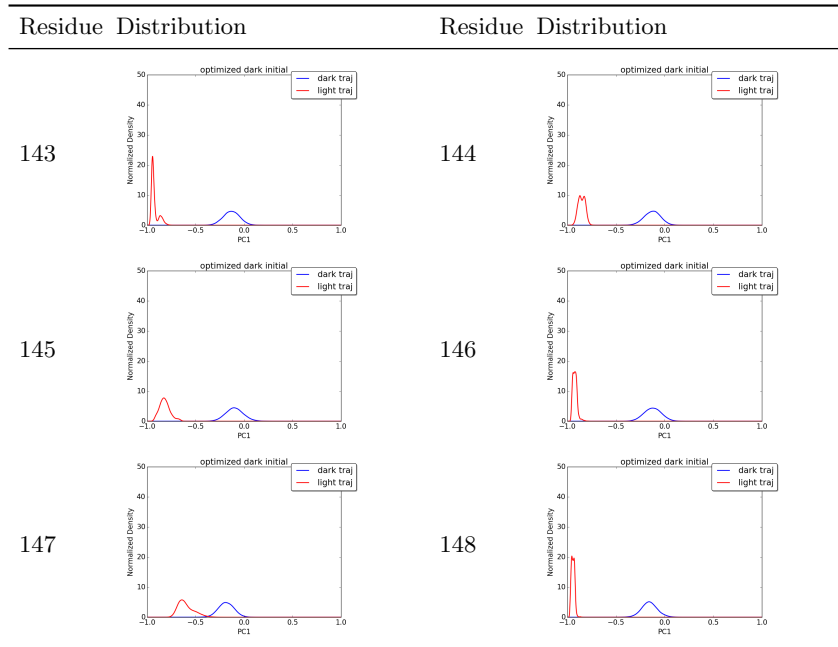

Supplement: srep46626-s1.pdf [file srep46626-s1.pdf]
